# Supplementary material for: Surfactant-controlled switchable oxygenation of sulfides to sulfoxides or sulfones under visible-light irradiation
Source: Royal Society of Chemistry journal article supplement (doi:10.1039/d4nj01784f), 2024-01-01
Supplement: d4nj01784f1.pdf [file d4nj01784f1.pdf]

**Supporting Information**

**Surfactant-controlled Switchable Oxygenation of  
Sulfides to Sulfoxides or Sulfones under Visible-light  
Irradiation**

Rongnan Yi, Yan Wu \*, Junhao Chen, Ting Wu, Jin-Yang Chen\*

Key Laboratory of Food & Environment & Drug Monitoring and Testing of  
Universities in Hunan Province, Hunan Police Academy, Changsha 410138,  
China

E-mail: chenjinyang@hnu.edu.cn; wyan2018@163.com

**Table of Content**

|                                                                                            |            |
|--------------------------------------------------------------------------------------------|------------|
| <b>1. General information.....</b>                                                         | <b>S2</b>  |
| <b>2. Information for the photoreactor.....</b>                                            | <b>S3</b>  |
| <b>3. Experimental Section.....</b>                                                        | <b>S4</b>  |
| <b>4. Characterization data of sulfoxides 2 and sulfones 3.....</b>                        | <b>S8</b>  |
| <b>5. References.....</b>                                                                  | <b>S20</b> |
| <b>6. <sup>1</sup>H and <sup>13</sup>C NMR spectra of sulfoxides 2 and sulfones 3.....</b> | <b>S21</b> |

## 1. General Information

Unless otherwise noted, materials were obtained from commercial suppliers and used without further purification. Thin layer chromatography (TLC) employed glass 0.25 mm silica gel plates. Flash chromatography columns were packed with 200-300 mesh silica gel.  $^1\text{H}$  NMR spectra were recorded at 500 MHz,  $^{13}\text{C}$  NMR spectra were recorded at 126 MHz by using a Bruker Avance 500 spectrometer. Chemical shifts were calibrated using residual undeuterated solvent as an internal reference ( $^1\text{H}$  NMR:  $\text{CDCl}_3$  7.26 ppm,  $^{13}\text{C}$  NMR:  $\text{CDCl}_3$  77.0 ppm), the chemical shifts ( $\delta$ ) were expressed in ppm, and J values were given in Hz. HRMS were performed on a spectrometer operating on ESI-TOF.

## 2. Information for the photoreactor

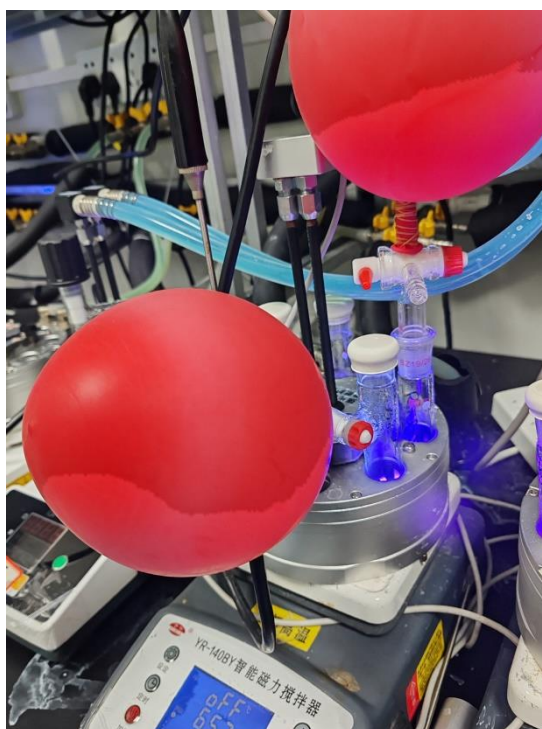

# LED Test Report

**Product Mark**

Model: ZA494000-415nm (415.7)

Temperature: 25°C

Tester: admin

Manufacture: Beijing rogerstech Ltd

Humidity: 65%

Test Date: 2023-10-26,11:30:08

**Parameter**

| Name                      | Value         | Name                    | Value         | Name             | Value | Name | Value |
|---------------------------|---------------|-------------------------|---------------|------------------|-------|------|-------|
| ESuv(mW/cm <sup>2</sup> ) | 0.0001        | SDCM                    | 100.00        | Peak Signal      | 53636 |      |       |
| Euvv(mW/cm <sup>2</sup> ) | 0.0000        | Ra                      | -82.8         | Dark Signal      | 3124  |      |       |
| Euvb(mW/cm <sup>2</sup> ) | 0.0000        | Ee(mW/cm <sup>2</sup> ) | 144.57433     | Compensate level | 2904  |      |       |
| Euva(mW/cm <sup>2</sup> ) | 1.7754        | S/P                     | 51.306        |                  |       |      |       |
| Euv(mW/cm <sup>2</sup> )  | 1.78          | Dominant(nm)            | 426.10        |                  |       |      |       |
| Eb(mW/cm <sup>2</sup> )   | 134.03        | Purity(%)               | 99.9          |                  |       |      |       |
| Eg(mW/cm <sup>2</sup> )   | 0.00          | HalfWidth(nm)           | 13.5          |                  |       |      |       |
| Er(mW/cm <sup>2</sup> )   | 0.00          | Peak(nm)                | 415.7         |                  |       |      |       |
| Eir(mW/cm <sup>2</sup> )  | 9.30          | Center(nm)              | 416.1         |                  |       |      |       |
| E(lx)                     | 4025.03       | Centroid(nm)            | 444.2         |                  |       |      |       |
| Candle E(fc)              | 373.93        | Color Ratio(RGB)        | 0.0,0.0,100.0 |                  |       |      |       |
| CCT(K)                    | 100000        | CIE1931 X               | 161929.688    |                  |       |      |       |
| Duv                       | -0.12865      | CIE1931 Y               | 5893.156      |                  |       |      |       |
| CIE x,y                   | 0.1701,0.0062 | CIE1931 Z               | 784093.125    |                  |       |      |       |
| CIE u,v                   | 0.2489,0.0136 | TLCI-2012               | 0             |                  |       |      |       |
| CIE u',v'                 | 0.2489,0.0204 | Integral Time(ms)       | 0.1           |                  |       |      |       |

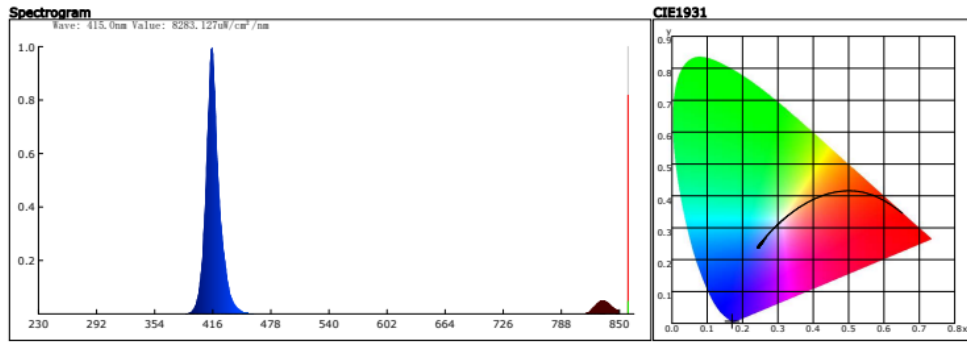

Figure S1. The visible-light irradiation instrument and the spectrum of our lamp

### 3. Experimental Section

#### 3.1 General experimental procedures for sulfoxides 2

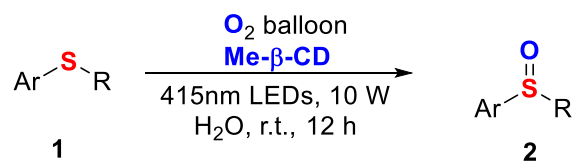

In a 10 mL Schlenk with a stirring bar, sulfides **1** (0.2 mmol, 0.2 mmol/mL) and Me- $\beta$ -CD (0.1 g/mL) were dissolved in H<sub>2</sub>O (1 mL). The mixture was stirred at 25 °C with 10 W LED (415 nm) irradiation for 12 h. After the reaction was completed, the reaction mixture was diluted and extracted by ethyl acetate (10 mL x 3). The combined organic layer was dried over Na<sub>2</sub>SO<sub>4</sub> AND evaporated under vacuum. The residue was purified by silica gel chromatography (petroleum ether/ethyl acetate) to afford the desired sulfoxides **2**.

#### 3.2 General experimental procedures for sulfones 3

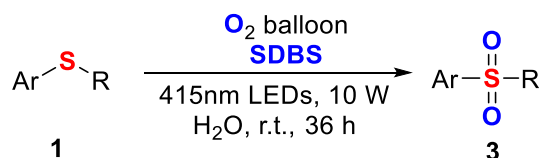

In a 10 mL Schlenk with a stirring bar, sulfides **1** (0.2 mmol, 0.2 mmol/mL) and SDBS (0.1 g/mL) were dissolved in H<sub>2</sub>O (1 mL). The mixture was stirred at 25 °C with 10 W LED (415 nm) irradiation for 36 h. After the reaction was completed, the reaction mixture was diluted and extracted by ethyl acetate (10 mL x 3). The combined organic layer was dried over Na<sub>2</sub>SO<sub>4</sub> AND evaporated under vacuum. The residue was purified by silica gel chromatography (petroleum ether/ethyl acetate) to afford the desired sulfones **3**.

#### 3.3 Control Experiments.

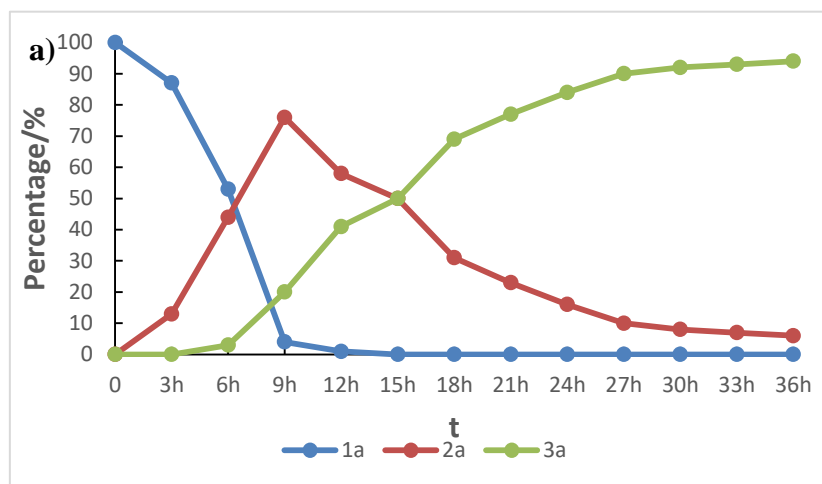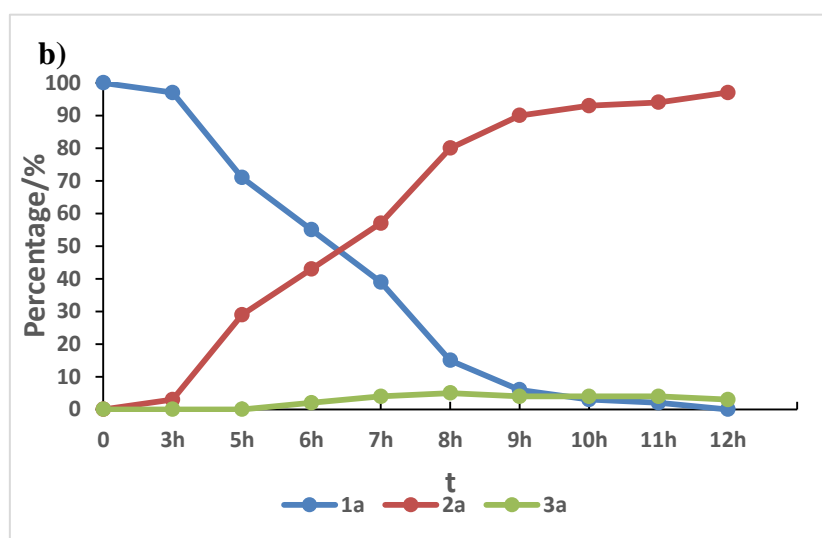

**Figure S2.** Time course for the conversion of methylphenyl sulfide **1a**.

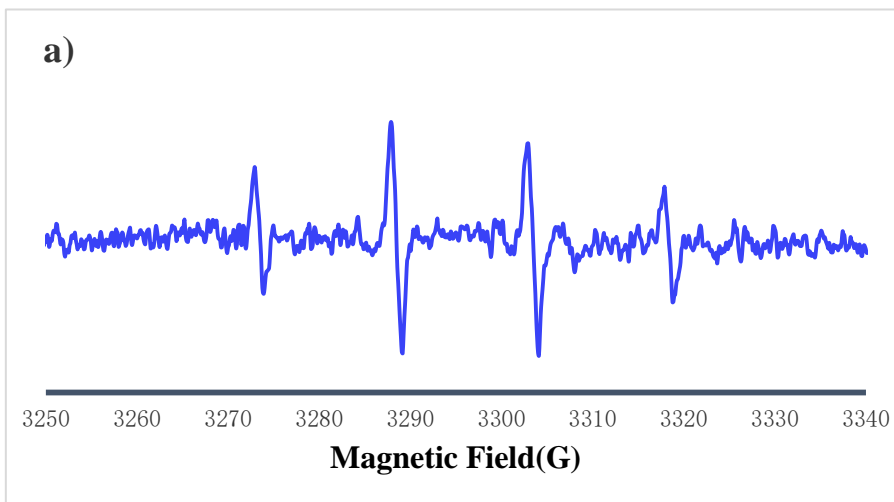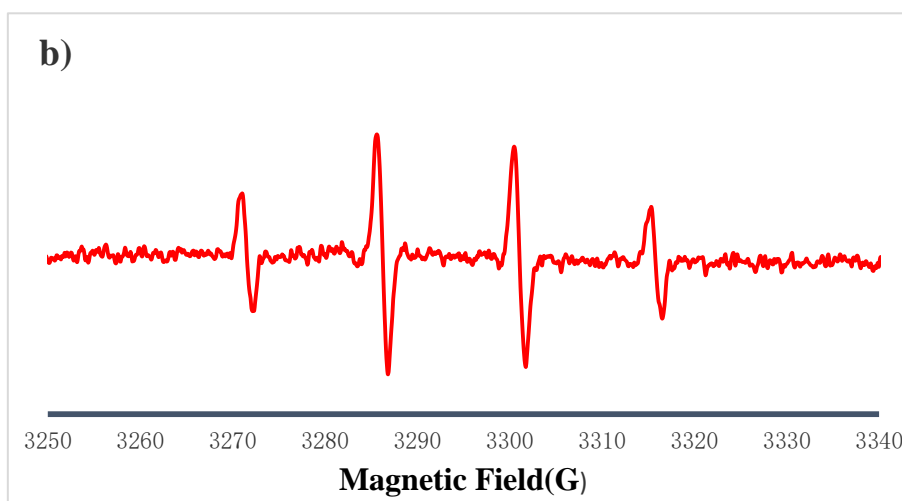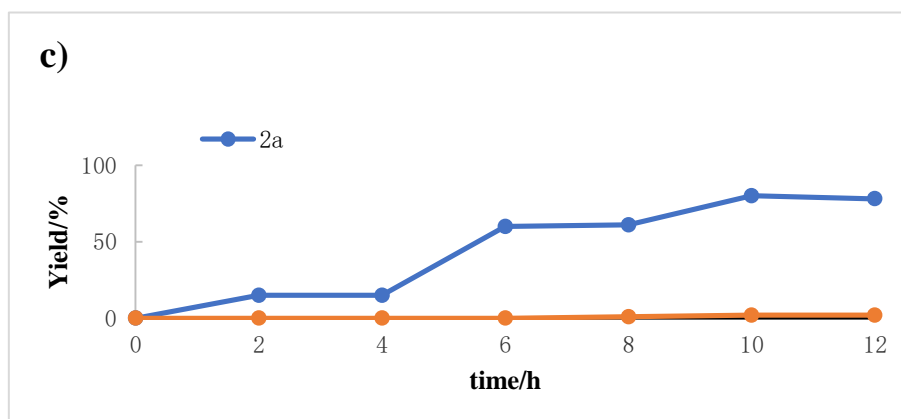

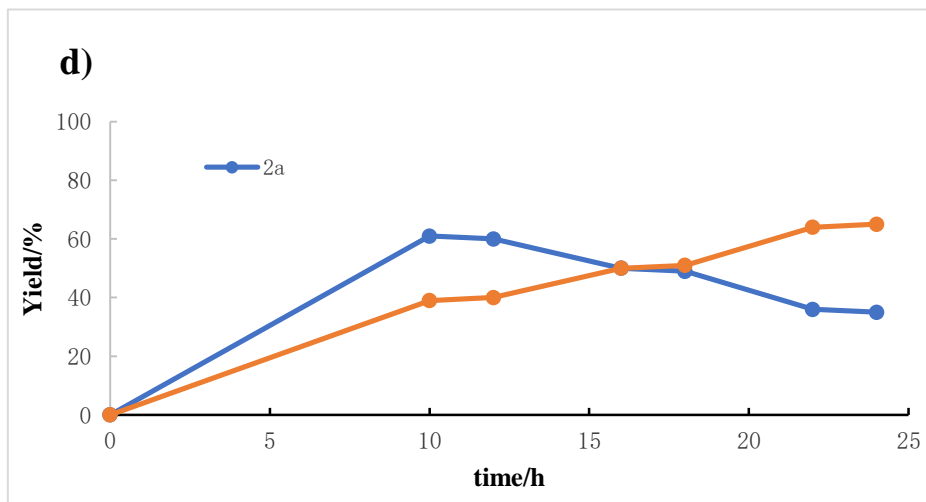

**Figure S3.** a) EPR Experiment for sulfoxides **2a**; b) EPR Experiment for sulfones **3a**; c) On-off Experiment for sulfoxides **2a**; d) On-off Experiment for sulfones **3a**.

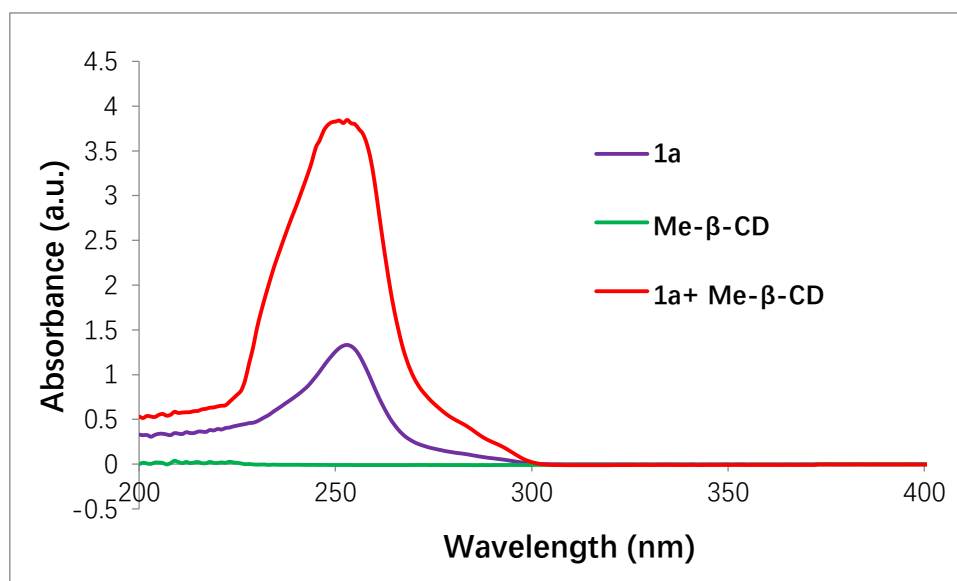

**Figure S4.** The UV-vis absorption spectra of **1a**, Me-β-CD or the mixture of **1a** and Me-β-CD in ethanol (0.01 M).

#### 4. Characterization data of sulfoxides **2** and sulfones **3**

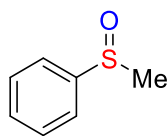

(*methylsulfinyl*)benzene (**2a**)<sup>[1]</sup>: <sup>1</sup>H NMR (500 MHz, Chloroform-*d*) δ 7.62 (d, *J* = 7.6 Hz, 2H), 7.53-7.45 (m, 3H), 2.69 (s, 3H); <sup>13</sup>C NMR (126 MHz, Chloroform-*d*) δ 145.69, 131.04, 129.36, 123.49, 43.95.

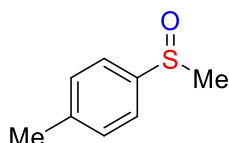

1-*methyl-4-(methylsulfinyl)benzene* (**2b**)<sup>[1]</sup>: <sup>1</sup>H NMR (500 MHz, Chloroform-*d*) δ 7.54 (d, *J* = 7.8 Hz, 2H), 7.33 (d, *J* = 7.8 Hz, 2H), 2.71 (s, 3H), 2.42 (s, 3H); <sup>13</sup>C NMR (126 MHz, Chloroform-*d*) δ 142.53, 141.56, 130.07, 123.58, 44.08, 21.43.

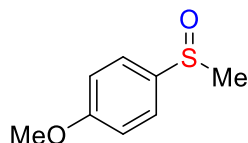

1-*methoxy-4-(methylsulfinyl)benzene* (**2c**)<sup>[1]</sup>: <sup>1</sup>H NMR (500 MHz, Chloroform-*d*) δ 7.60 (d, *J* = 8.6 Hz, 2H), 7.04 (d, *J* = 8.6 Hz, 2H), 3.86 (s, 3H), 2.70 (s, 3H); <sup>13</sup>C NMR (126 MHz, Chloroform-*d*) δ 161.99, 136.63, 125.48, 114.87, 55.56, 44.04.

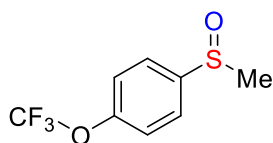

1-*(methylsulfinyl)-4-(trifluoromethoxy)benzene* (**2d**)<sup>[2]</sup>: <sup>1</sup>H NMR (500 MHz, Chloroform-*d*) δ 7.69 (d, *J* = 8.4 Hz, 2H), 7.38 (d, *J* = 8.3 Hz, 2H), 2.73 (s, 3H); <sup>13</sup>C NMR (126 MHz, Chloroform-*d*) δ 151.10 (d, *J* = 1.83 Hz), 144.15, 125.43, 121.77, 120.32 (q, *J* = 257.5 Hz), 44.07.

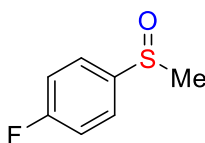



*1-fluoro-4-(methylsulfinyl)benzene (2e)*<sup>[11]</sup>: <sup>1</sup>H NMR (500 MHz, Chloroform-*d*) δ 7.66 (dd, *J* = 8.5, 5.1 Hz, 2H), 7.24 (dd, *J* = 15.0, 6.6 Hz, 2H), 2.72 (s, 3H); <sup>13</sup>C NMR (126 MHz, Chloroform-*d*) δ 164.47 (d, *J* = 250 Hz), 141.46, 125.99 (d, *J* = 8.75 Hz), 116.86 (d, *J* = 21.25 Hz), 44.39.

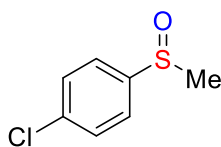

*1-chloro-4-(methylsulfinyl)benzene (2f)*<sup>[11]</sup>: <sup>1</sup>H NMR (500 MHz, Chloroform-*d*) δ 7.39 (d, *J* = 8.1 Hz, 2H), 7.31 (d, *J* = 8.2 Hz, 2H), 2.52 (s, 3H); <sup>13</sup>C NMR (126 MHz, Chloroform-*d*) δ 144.28, 137.28, 129.69, 124.99, 44.12.

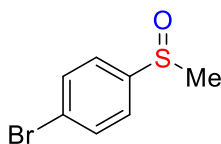

*1-bromo-4-(methylsulfinyl)benzene (2g)*<sup>[11]</sup>: <sup>1</sup>H NMR (500 MHz, Chloroform-*d*) δ 7.46 (d, *J* = 8.5 Hz, 2H), 7.31 (d, *J* = 8.5 Hz, 2H), 2.51 (s, 3H); <sup>13</sup>C NMR (126 MHz, Chloroform-*d*) δ 144.87, 132.61, 125.49, 125.16, 44.02.

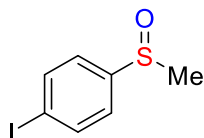

*1-iodo-4-(methylsulfinyl)benzene (2h)*<sup>[31]</sup>: <sup>1</sup>H NMR (500 MHz, Chloroform-*d*) δ 7.88 (d, *J* = 7.2 Hz, 2H), 7.38 (d, *J* = 7.0 Hz, 2H), 2.72 (s, 3H); <sup>13</sup>C NMR (126 MHz, Chloroform-*d*) δ 145.71, 138.49, 125.16, 97.40, 43.99.

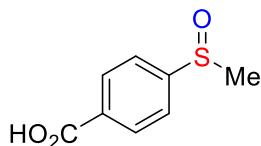

*4-(methylsulfinyl)benzoic acid (2i)*<sup>[41]</sup>: <sup>1</sup>H NMR (500 MHz, Chloroform-*d*) δ 8.00 (d, *J* = 8.6 Hz, 2H), 7.28 (d, *J* = 8.9 Hz, 2H), 2.53 (s, 3H), 1.25 (s, 1H); <sup>13</sup>C NMR (126 MHz, Chloroform-*d*) δ 171.41, 146.89, 130.61, 125.34, 125.01, 14.89.

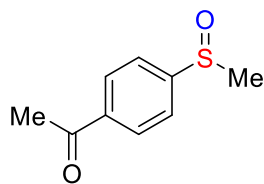

*1-(4-(methylsulfinyl)phenyl)ethan-1-one (2j)*<sup>[1]</sup>: <sup>1</sup>H NMR (500 MHz, Chloroform-*d*) δ 8.11 (d, *J* = 8.2 Hz, 2H), 7.75 (d, *J* = 8.3 Hz, 2H), 2.76 (s, 3H), 2.66 (s, 3H); <sup>13</sup>C NMR (126 MHz, Chloroform-*d*) δ 197.08, 150.92, 139.09, 129.18, 123.77, 43.84, 26.83.

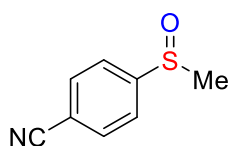

*4-(methylsulfinyl)benzonitrile (2k)*<sup>[1]</sup>: <sup>1</sup>H NMR (500 MHz, Chloroform-*d*) δ 7.83 (d, *J* = 8.1 Hz, 2H), 7.76 (d, *J* = 8.1 Hz, 2H), 2.76 (s, 3H); <sup>13</sup>C NMR (126 MHz, Chloroform-*d*) δ 151.53, 133.14, 124.44, 117.83, 114.96, 43.92.

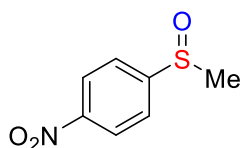

*1-(methylsulfinyl)-4-nitrobenzene (2l)*<sup>[1]</sup>: <sup>1</sup>H NMR (500 MHz, Chloroform-*d*) δ 8.40 (d, *J* = 8.8 Hz, 2H), 7.84 (d, *J* = 8.4 Hz, 2H), 2.79 (s, 3H); <sup>13</sup>C NMR (126 MHz, Chloroform-*d*) δ 153.25, 149.52, 124.68, 124.53, 43.91.

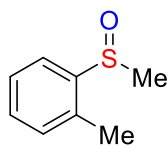

*1-methyl-2-(methylsulfinyl)benzene (2m)*<sup>[5]</sup>: <sup>1</sup>H NMR (500 MHz, Chloroform-*d*) δ 7.95 (d, *J* = 7.7 Hz, 1H), 7.45 (t, *J* = 7.8 Hz, 1H), 7.39 (t, *J* = 7.4 Hz, 1H), 7.21 (d, *J* = 7.5 Hz, 1H), 2.69 (s, 3H), 2.38 (s, 3H); <sup>13</sup>C NMR (126 MHz, Chloroform-*d*) δ 143.97, 133.95, 130.77, 130.66, 127.46, 123.00, 42.08, 18.07.

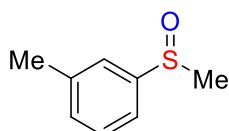

*1-methyl-3-(methylsulfinyl)benzene (2n)* <sup>[5]</sup>: <sup>1</sup>H NMR (500 MHz, Chloroform-*d*) δ 7.47 (s, 1H), 7.41 -7.37 (m, 2H), 7.29 (dt, *J* = 3.6, 2.2 Hz, 1H), 2.70 (s, 3H), 2.42 (s, 3H); <sup>13</sup>C NMR (126 MHz, Chloroform-*d*) δ 145.60, 139.72, 131.95, 129.25, 123.85, 120.69, 44.03, 21.53.

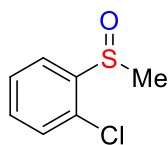

*1-chloro-2-(methylsulfinyl)benzene (2o)* <sup>[4]</sup>: <sup>1</sup>H NMR (500 MHz, Chloroform-*d*) δ 7.93 (d, *J* = 7.8 Hz, 1H), 7.52 (t, *J* = 7.3 Hz, 1H), 7.43 (t, *J* = 7.6 Hz, 1H), 7.38 (d, *J* = 6.8 Hz, 1H), 2.80 (s, 3H); <sup>13</sup>C NMR (126 MHz, Chloroform-*d*) δ 143.61, 131.99, 129.78, 128.17, 125.32, 125.05, 41.66.

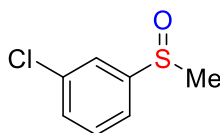

*1-chloro-3-(methylsulfinyl)benzene (2p)* <sup>[11]</sup>: <sup>1</sup>H NMR (500 MHz, Chloroform-*d*) δ 7.63 (s, 1H), 7.51 -7.41 (m, 3H), 2.71 (s, 3H); <sup>13</sup>C NMR (126 MHz, Chloroform-*d*) δ 147.87, 135.71, 131.19, 130.60, 123.63, 121.62, 44.03.

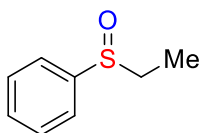

*(ethylsulfinyl)benzene (2q)* <sup>[11]</sup>: <sup>1</sup>H NMR (500 MHz, Chloroform-*d*) δ 7.59 (d, *J* = 7.3 Hz, 2H), 7.52-7.46 (m, 3H), 2.92-2.85 (m, 1H), 2.79-2.71 (m, 1H), 1.18 (t, *J* = 7.4 Hz, 3H); <sup>13</sup>C NMR (126 MHz, Chloroform-*d*) δ 143.38, 131.02, 129.23, 124.27, 50.38, 6.05.

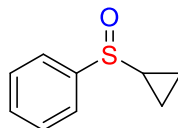

*(cyclopropylsulfinyl)benzene (2r)* <sup>[11]</sup>: <sup>1</sup>H NMR (500 MHz, Chloroform-*d*) δ 7.66 (dd, *J* = 7.6, 2.0 Hz, 2H), 7.56-7.47 (m, 3H), 2.29-2.24 (m, 1H), 1.27-1.22 (m, 1H), 1.07-1.00 (m, 1H), 1.00-0.90 (m, 2H); <sup>13</sup>C NMR (126 MHz, Chloroform-*d*) δ 144.99, 131.07, 129.30, 124.15, 33.96, 3.55, 2.98.

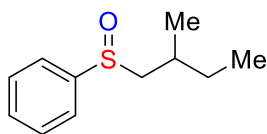

*((2-methylbutyl)sulfinyl)benzene (2s)*<sup>[11]</sup>: <sup>1</sup>H NMR (500 MHz, Chloroform-*d*) δ 7.63 (d, *J* = 5.6 Hz, 2H), 7.54-7.45 (m, 3H), 2.88 (dd, *J* = 13.0, 4.0 Hz, 0.5H), 2.78 (dd, *J* = 13.1, 5.9 Hz, 0.5H), 2.60 (dd, *J* = 13.1, 7.9 Hz, 0.5H), 2.44-2.37 (m, 1H), 2.08-1.93 (m, 1H), 1.68 (dt, *J* = 13.3, 6.3 Hz, 1H), 1.43 (dq, *J* = 14.1, 7.0 Hz, 0.5H), 1.38-1.27 (m, 1H), 1.15 (d, *J* = 6.6 Hz, 1.5H), 1.04 (d, *J* = 6.8 Hz, 1.5H), 0.90 (q, *J* = 7.4 Hz, 3H); <sup>13</sup>C NMR (126 MHz, Chloroform-*d*) δ 144.94, 144.86, 131.08, 130.98, 129.37, 124.10, 123.97, 66.23, 65.97, 30.38, 30.22, 29.76, 28.59, 19.51, 18.70, 11.14, 10.91.

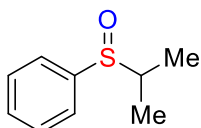

*(isopropylsulfinyl)benzene (2t)*<sup>[61]</sup>: <sup>1</sup>H NMR (500 MHz, Chloroform-*d*) δ 7.58 (dd, *J* = 7.6, 2.1 Hz, 2H), 7.54-7.45 (m, 3H), 2.82 (hept, *J* = 6.9 Hz, 1H), 1.22 (d, *J* = 6.9 Hz, 3H), 1.13 (d, *J* = 6.8 Hz, 3H); <sup>13</sup>C NMR (126 MHz, Chloroform-*d*) δ 141.76, 130.97, 128.88, 125.01, 54.55, 15.87, 13.94.

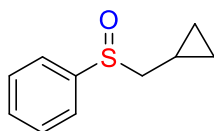

*((cyclopropylmethyl)sulfinyl)benzene (2u)*<sup>[71]</sup>: <sup>1</sup>H NMR (500 MHz, Chloroform-*d*) δ 7.66 (d, *J* = 5.7 Hz, 2H), 7.54-7.50 (m, 3H), 2.86 (dd, *J* = 13.2, 7.0 Hz, 1H), 2.68 (t, *J* = 10.5 Hz, 1H), 1.01-0.96 (m, 1H), 0.63 (d, *J* = 8.3 Hz, 2H), 0.27 (dd, *J* = 9.9, 4.9 Hz, 2H); <sup>13</sup>C NMR (126 MHz, Chloroform-*d*) δ 144.00, 131.13, 129.22, 124.32, 63.38, 5.27, 4.94, 4.80.

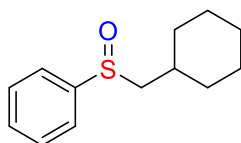

*((cyclohexylmethyl)sulfinyl)benzene (2v)*<sup>[81]</sup>: <sup>1</sup>H NMR (500 MHz, Chloroform-*d*) δ 7.65-7.60 (m, 2H), 7.54-7.45 (m, 3H), 2.79 (dd, *J* = 13.0, 4.7 Hz, 1H), 2.48 (dd, *J* = 13.1, 9.3 Hz, 1H), 2.10 (dt, *J* = 13.0, 3.1 Hz, 1H), 1.99-1.90 (m, 1H), 1.77-1.65 (m, 4H), 1.36-1.25 (m, 2H), 1.21-1.15 (m, 1H), 1.12-1.04 (m, 2H); <sup>13</sup>C NMR (126 MHz, Chloroform-*d*) δ 144.72, 130.88, 129.23, 123.85, 66.26, 33.40, 33.00, 32.22, 26.00, 25.91, 25.60.

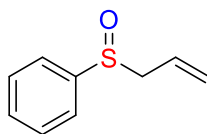

(allylsulfinyl)benzene (**2w**)<sup>[9]</sup>: <sup>1</sup>H NMR (500 MHz, Chloroform-*d*) δ 7.43-7.37 (m, 2H), 7.34-7.28 (m, 3H), 5.48-5.40 (m, 1H), 5.13 (d, *J* = 10.1 Hz, 1H), 4.99 (dd, *J* = 17.0, 1.4 Hz, 1H), 3.40-3.28 (m, 2H); <sup>13</sup>C NMR (126 MHz, Chloroform-*d*) δ 143.00, 131.26, 129.19, 125.36, 124.49, 124.07, 60.98.

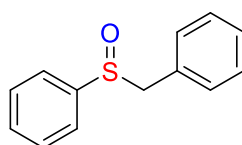

(benzylsulfinyl)benzene (**2x**)<sup>[9]</sup>: <sup>1</sup>H NMR (500 MHz, DMSO-*d*<sub>6</sub>) δ 7.56-7.48 (m, 5H), 7.31-7.23 (m, 3H), 7.11-7.05 (m, 2H), 4.25 (d, *J* = 12.8 Hz, 1H), 4.06 (d, *J* = 12.8 Hz, 1H); <sup>13</sup>C NMR (126 MHz, DMSO-*d*<sub>6</sub>) δ 143.38, 130.89, 130.41, 130.40, 128.92, 128.12, 127.84, 124.31, 61.59.

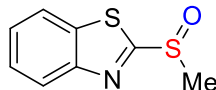

2-(methylsulfinyl)benzo[*d*]thiazole (**2y**)<sup>[10]</sup>: <sup>1</sup>H NMR (500 MHz, Chloroform-*d*) δ 8.07 (d, *J* = 8.2 Hz, 1H), 8.02 (d, *J* = 8.1 Hz, 1H), 7.58 (t, *J* = 7.7 Hz, 1H), 7.50 (t, *J* = 7.7 Hz, 1H), 3.09 (s, 3H); <sup>13</sup>C NMR (126 MHz, Chloroform-*d*) δ 178.44, 153.81, 136.04, 127.03, 126.31, 124.02, 122.37, 43.21.

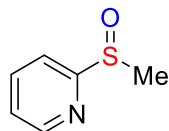

2-(methylsulfinyl)pyridine (**2z**)<sup>[11]</sup>: <sup>1</sup>H NMR (500 MHz, Chloroform-*d*) δ 8.59 (d, *J* = 4.0 Hz, 1H), 8.00 (d, *J* = 8.1 Hz, 1H), 7.94-7.91 (m, 1H), 7.40-7.33 (m, 1H), 2.82 (s, 3H); <sup>13</sup>C NMR (126 MHz, Chloroform-*d*) δ 165.86, 149.56, 138.16, 124.64, 119.26, 41.28.

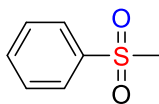

(methylsulfonyl)benzene (**3a**)<sup>[1]</sup>: <sup>1</sup>H NMR (500 MHz, Chloroform-*d*) δ 7.94 (d, *J* = 6.9 Hz, 2H), 7.66 (t, *J* = 7.4 Hz, 1H), 7.57 (t, *J* = 7.7 Hz, 2H), 3.05 (s, 3H); <sup>13</sup>C NMR (126 MHz, Chloroform-*d*) δ 140.70, 133.83, 129.49, 127.46, 44.61.

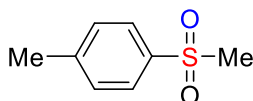

1-methyl-4-(methylsulfonyl)benzene (**3b**)<sup>[1]</sup>: <sup>1</sup>H NMR (500 MHz, Chloroform-*d*) δ 7.82 (d, *J* = 8.0 Hz, 2H), 7.36 (d, *J* = 8.0 Hz, 2H), 3.03 (s, 3H), 2.44 (s, 3H); <sup>13</sup>C NMR (126 MHz, Chloroform-*d*) δ 144.79, 137.84, 130.07, 127.49, 44.73, 21.73.

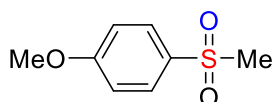

1-methoxy-4-(methylsulfonyl)benzene (**3c**)<sup>[1]</sup>: <sup>1</sup>H NMR (500 MHz, Chloroform-*d*) δ 7.64 (d, *J* = 8.6 Hz, 2H), 6.80 (d, *J* = 8.6 Hz, 2H), 3.66 (d, *J* = 1.2 Hz, 3H), 2.80 (d, *J* = 1.2 Hz, 3H); <sup>13</sup>C NMR (126 MHz, Chloroform-*d*) δ 163.79, 132.37, 129.62, 114.60, 55.80, 44.93.

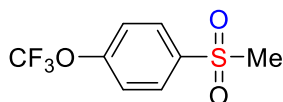

1-(methylsulfonyl)-4-(trifluoromethoxy)benzene (**3d**)<sup>[2]</sup>: <sup>1</sup>H NMR (500 MHz, Chloroform-*d*) δ 8.01 (d, *J* = 8.8 Hz, 2H), 7.40 (d, *J* = 8.4 Hz, 2H), 3.07 (s, 3H); <sup>13</sup>C NMR (126 MHz, Chloroform-*d*) δ 153.01 (d, *J* = 2.5 Hz), 138.82, 129.76, 121.20, 120.20 (q, *J* = 257.5 Hz), 44.56.

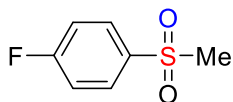

1-fluoro-4-(methylsulfonyl)benzene (**3e**)<sup>[1]</sup>: <sup>1</sup>H NMR (500 MHz, Chloroform-*d*) δ 7.96 (dd, *J* = 8.5, 5.1 Hz, 2H), 7.25 (t, *J* = 8.5 Hz, 2H), 3.05 (s, 3H); <sup>13</sup>C NMR (126 MHz, Chloroform-*d*) δ 165.80 (d, *J* = 256.4 Hz), 136.68 (d, *J* = 3.2 Hz), 130.30 (d, *J* = 9.6 Hz), 116.69 (d, *J* = 22.6 Hz), 44.67.

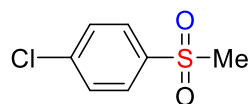

*1-chloro-4-(methylsulfonyl)benzene (3f)*<sup>[1]</sup>: <sup>1</sup>H NMR (500 MHz, Chloroform-*d*) δ 7.88 (d, *J* = 8.5 Hz, 2H), 7.54 (d, *J* = 8.5 Hz, 2H), 3.05 (s, 3H); <sup>13</sup>C NMR (126 MHz, Chloroform-*d*) δ 140.55, 139.09, 129.81, 129.02, 44.63.

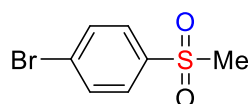

*1-bromo-4-(methylsulfonyl)benzene (3g)*<sup>[1]</sup>: <sup>1</sup>H NMR (500 MHz, Chloroform-*d*) δ 8.36 (d, *J* = 8.4 Hz, 2H), 8.10 (d, *J* = 8.4 Hz, 2H), 3.06 (s, 3H); <sup>13</sup>C NMR (126 MHz, Chloroform-*d*) δ 150.98, 146.05, 129.10, 124.77, 44.41.

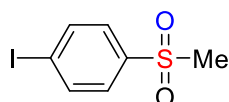

*1-iodo-4-(methylsulfonyl)benzene (3h)*<sup>[3]</sup>: <sup>1</sup>H NMR (500 MHz, Chloroform-*d*) δ 7.93 (d, *J* = 7.3 Hz, 2H), 7.65 (d, *J* = 8.6 Hz, 2H), 3.04 (s, 3H); <sup>13</sup>C NMR (126 MHz, Chloroform-*d*) δ 140.25, 138.77, 128.87, 101.70, 44.57.

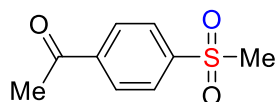

*1-(4-(methylsulfonyl)phenyl)ethan-1-one (3j)*<sup>[1]</sup>: <sup>1</sup>H NMR (500 MHz, Chloroform-*d*) δ 8.12 (d, *J* = 8.1 Hz, 2H), 8.04 (d, *J* = 8.3 Hz, 2H), 3.08 (s, 3H), 2.66 (s, 3H); <sup>13</sup>C NMR (126 MHz, Chloroform-*d*) δ 196.79, 144.31, 141.04, 129.27, 127.94, 44.44, 27.06.

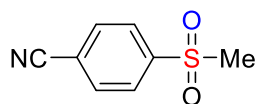

*4-(methylsulfonyl)benzonitrile (3k)*<sup>[1]</sup>: <sup>1</sup>H NMR (500 MHz, Chloroform-*d*) δ 8.08 (d, *J* = 7.9 Hz, 2H), 7.89 (d, *J* = 7.9 Hz, 2H), 3.09 (s, 3H); <sup>13</sup>C NMR (126 MHz, Chloroform-*d*) δ 144.56, 133.33, 128.32, 117.71, 117.17, 44.34.

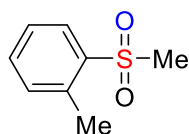

*1-methyl-2-(methylsulfonyl)benzene (3m)* <sup>[5]</sup>: <sup>1</sup>H NMR (500 MHz, Chloroform-*d*) δ 8.25 (d, *J* = 7.9 Hz, 1H), 7.73 (t, *J* = 7.5 Hz, 1H), 7.59 (t, *J* = 7.6 Hz, 1H), 7.55 (d, *J* = 7.6 Hz, 1H), 3.29 (s, 3H), 2.93 (s, 3H); <sup>13</sup>C NMR (126 MHz, Chloroform-*d*) δ 138.83, 137.67, 133.81, 132.84, 129.37, 126.86, 43.79, 20.39.

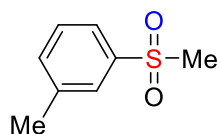

*1-methyl-3-(methylsulfonyl)benzene (3n)* <sup>[5]</sup>: <sup>1</sup>H NMR (500 MHz, Chloroform-*d*) δ 7.93-7.86 (m, 2H), 7.64-7.57 (m, 2H), 3.20 (s, 3H), 2.59 (d, *J* = 3.4 Hz, 3H); <sup>13</sup>C NMR (126 MHz, Chloroform-*d*) δ 140.37, 139.64, 134.47, 129.24, 127.57, 124.35, 44.42, 21.28.

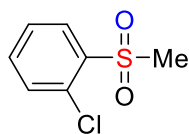

*1-chloro-2-(methylsulfonyl)benzene (3o)* <sup>[4]</sup>: <sup>1</sup>H NMR (500 MHz, Chloroform-*d*) δ 8.34 (d, *J* = 7.9 Hz, 1H), 7.82-7.73 (m, 2H), 7.69-7.66 (m, 1H), 3.47 (s, 3H); <sup>13</sup>C NMR (126 MHz, Chloroform-*d*) δ 137.98, 134.90, 132.55, 131.96, 130.83, 127.60, 42.79.

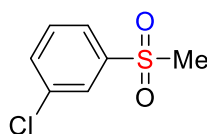

*1-chloro-3-(methylsulfonyl)benzene (3p)* <sup>[1]</sup>: <sup>1</sup>H NMR (500 MHz, Chloroform-*d*) δ 7.84 (s, 1H), 7.74 (d, *J* = 7.8 Hz, 1H), 7.53 (d, *J* = 8.1 Hz, 1H), 7.43 (t, *J* = 7.9 Hz, 1H), 2.98 (s, 3H); <sup>13</sup>C NMR (126 MHz, Chloroform-*d*) δ 142.22, 135.68, 133.97, 130.80, 127.65, 125.57, 44.50.

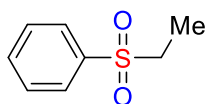



(ethylsulfonyl)benzene (**3q**)<sup>[1]</sup>: <sup>1</sup>H NMR (500 MHz, Chloroform-*d*) δ 7.89 (d, *J* = 7.8 Hz, 2H), 7.64 (t, *J* = 7.4 Hz, 1H), 7.56 (t, *J* = 7.6 Hz, 2H), 3.10 (q, *J* = 7.4 Hz, 2H), 1.25 (t, *J* = 7.5 Hz, 3H); <sup>13</sup>C NMR (126 MHz, Chloroform-*d*) δ 138.49, 133.70, 129.27, 128.18, 50.58, 7.43.

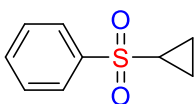

(cyclopropylsulfonyl)benzene (**3r**)<sup>[1]</sup>: <sup>1</sup>H NMR (500 MHz, Chloroform-*d*) δ 8.10 (d, *J* = 7.7 Hz, 2H), 7.84 (t, *J* = 7.4 Hz, 1H), 7.75 (t, *J* = 7.6 Hz, 2H), 2.66 (tt, *J* = 8.5, 4.9 Hz, 1H), 1.58-1.51 (m, 2H), 1.26-1.19 (m, 2H); <sup>13</sup>C NMR (126 MHz, Chloroform-*d*) δ 140.81, 133.48, 129.34, 127.66, 33.02, 6.08.

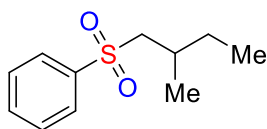

((2-methylbutyl)sulfonyl)benzene (**3s**)<sup>[1]</sup>: <sup>1</sup>H NMR (500 MHz, Chloroform-*d*) δ 7.90 (d, *J* = 7.7 Hz, 2H), 7.67-7.60 (m, 1H), 7.55 (t, *J* = 7.2 Hz, 2H), 3.07 (dd, *J* = 14.1, 4.7 Hz, 1H), 2.91 (dd, *J* = 14.2, 7.8, 1H), 2.07-1.96 (m, 1H), 1.51-1.39 (m, 1H), 1.28 (dp, *J* = 14.7, 7.5 Hz, 1H), 1.04 (dd, *J* = 6.7, 1.6 Hz, 3H), 0.82 (td, *J* = 7.3, 1.5 Hz, 3H); <sup>13</sup>C NMR (126 MHz, Chloroform-*d*) δ 140.21, 133.53, 129.27, 127.83, 62.26, 30.03, 29.40, 19.38, 10.71.

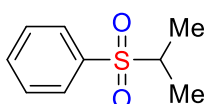

(isopropylsulfonyl)benzene (**3t**)<sup>[6]</sup>: <sup>1</sup>H NMR (500 MHz, Chloroform-*d*) δ 7.83 (d, *J* = 7.8 Hz, 2H), 7.64-7.59 (m, 1H), 7.52 (t, *J* = 7.6 Hz, 2H), 3.16 (p, *J* = 6.8 Hz, 1H), 1.24 (dd, *J* = 7.0, 1.6 Hz, 6H); <sup>13</sup>C NMR (126 MHz, Chloroform-*d*) δ 136.85, 133.59, 129.02, 128.89, 55.42, 15.58.

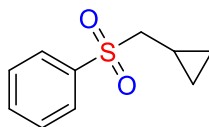

((cyclopropylmethyl)sulfonyl)benzene (**3u**)<sup>[7]</sup>: <sup>1</sup>H NMR (500 MHz, Chloroform-*d*) δ 7.92-7.83 (m, 2H), 7.60 (dd, *J* = 8.4, 6.5 Hz, 1H), 7.51 (t, *J* = 7.7 Hz, 2H), 2.97 (d, *J* = 7.3 Hz, 2H), 0.93-0.89 (m,

1H), 0.56-0.42 (m, 2H), 0.11-0.02 (m, 2H); <sup>13</sup>C NMR (126 MHz, Chloroform-*d*) δ 139.22, 133.65, 129.12, 128.33, 61.25, 4.80, 4.32.

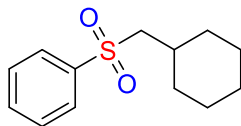

((cyclohexylmethyl)sulfonyl)benzene (**3v**)<sup>[11]</sup>: <sup>1</sup>H NMR (500 MHz, Chloroform-*d*) δ 7.91 (d, *J* = 7.8 Hz, 2H), 7.64 (t, *J* = 7.4 Hz, 1H), 7.56 (t, *J* = 7.6 Hz, 2H), 2.98 (d, *J* = 6.2 Hz, 2H), 2.02-1.95 (m, 1H), 1.86 (dd, *J* = 13.3, 3.8 Hz, 2H), 1.70-1.60 (m, 3H), 1.31-1.21 (m, 2H), 1.18-1.11 (m, 1H), 1.10-1.01 (m, 2H); <sup>13</sup>C NMR (126 MHz, Chloroform-*d*) δ 140.51, 133.63, 129.39, 127.89, 63.05, 33.28, 32.93, 25.90, 25.85.

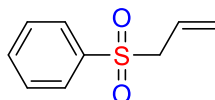

(allylsulfonyl)benzene (**3w**)<sup>[9]</sup>: <sup>1</sup>H NMR (500 MHz, Chloroform-*d*) δ 7.91-7.82 (m, 2H), 7.64 (t, *J* = 7.4 Hz, 1H), 7.55 (t, *J* = 7.8 Hz, 2H), 5.85-5.72 (m, 1H), 5.32 (d, *J* = 10.1 Hz, 1H), 5.14 (d, *J* = 17.1 Hz, 1H), 3.80 (d, *J* = 7.4 Hz, 2H); <sup>13</sup>C NMR (126 MHz, Chloroform-*d*) δ 138.35, 133.89, 129.17, 128.59, 124.87, 124.72, 60.97.

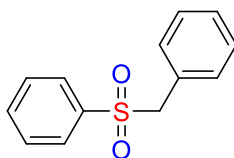

(benzylsulfonyl)benzene (**3x**)<sup>[9]</sup>: <sup>1</sup>H NMR (500 MHz, Chloroform-*d*) δ 7.63 (dd, *J* = 16.4, 7.7 Hz, 3H), 7.47 (t, *J* = 7.6 Hz, 2H), 7.33 (t, *J* = 7.4 Hz, 1H), 7.28 (d, *J* = 6.5 Hz, 2H), 7.09 (d, *J* = 7.5 Hz, 2H), 4.33 (s, 2H); <sup>13</sup>C NMR (126 MHz, Chloroform-*d*) δ 137.94, 133.85, 130.95, 129.01, 128.91, 128.78, 128.72, 128.22, 63.02.

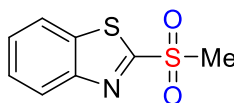

2-(methylsulfonyl)benzo[d]thiazole (**3y**)<sup>[12]</sup>: <sup>1</sup>H NMR (500 MHz, Chloroform-*d*) δ 8.22 (d, *J* = 8.2 Hz, 1H), 8.06-8.00 (m, 1H), 7.68-7.58 (m, 2H), 3.42 (s, 3H); <sup>13</sup>C NMR (126 MHz, Chloroform-*d*) δ 166.36, 152.44, 136.60, 128.12, 127.73, 125.41, 122.40, 42.44.

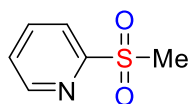

2-(methylsulfonyl)pyridine (**3z**)<sup>[13]</sup>: <sup>1</sup>H NMR (500 MHz, Chloroform-*d*) δ 8.72 (d, *J* = 3.1 Hz, 1H), 8.08 (d, *J* = 7.7 Hz, 1H), 7.97 (t, *J* = 7.8 Hz, 1H), 7.59-7.53 (m, 1H), 3.22 (s, 3H); <sup>13</sup>C NMR (126 MHz, Chloroform-*d*) δ 158.13, 150.18, 138.40, 127.57, 121.18, 40.12.

## 5. References

- [1] K.-J. Liu, J.-H. Deng, J. Yang, S.-F. Gong, Y.-W. Lin, J.-Y. He, Z. Cao, W.-M. He, *Green Chem.*, **2020**, *22*, 433-438.
- [2] M. Jakubczyk, S. Mkrtchyan, M. Shkooor, S. Lanka, S. Budzak, M. Ilias, M. Skorsepa, V. O. Iaroshenko, *J. Am. Chem. Soc.*, **2022**, *144*, 10438-10445.
- [3] F. Huang, Y. Wang, X. Dong, X. Lang, *Sci. China: Chem.*, **2023**, *66*, 3290-3296.
- [4] Z. Cheng, P. Sun, A. Tang, W. Jin, C. Liu, *Org. Lett.*, **2019**, *21*, 8925-8929
- [5] K.-J. Liu, Z. Wang, L.-H. Lu, J.-Y. Chen, F. Zeng, Y.-W. Lin, Z. Cao, X. Yu, W.-M. He, *Green Chem.*, **2021**, *23*, 496-500.
- [6] J. K. Park, S. Lee, *J. Org. Chem.*, **2021**, *86*, 13790-13799.
- [7] C. Gu, Z. Wang, R. Shi, *Chem. Comm.*, **2023**, *59*, 6889-6892.
- [8] K. E. Cantwell, P. E. Fanwick, M. M. Abu-Omar, *ACS Omega*, **2017**, *2*, 1778-1785.
- [9] S. Mirfakhraei, M. Hekmati, F. H. Eshbalab, H. Veisi, *New J. Chem.*, **2018**, *42*, 1757-1761.
- [10] S.-S. Zhu, L. Zuo, Y. Liu, B. Yu, *Green Chem.*, **2022**, *24*, 8725-8732.
- [11] L. Liu, J. A. Henderson, A. Yamamoto, P. Bremond, Y. Kishi, *Org. Lett.*, **2012**, *14*, 2262-2265.
- [12] J. Xu, L. Liu, Z.-C. Yan, Y. Liu, L. Qin, N. Deng, H.-J. Xu, *Green Chem.*, **2023**, *25*, 2268-2273.
- [13] X. Li, Y. Wang, L. Yang, Z. Zhang, X. Xie, *Tetrahedron*, **2022**, *110*, 132708.

## 6. $^1\text{H}$ and $^{13}\text{C}$ NMR spectra of sulfoxides **2** and sulfones **3**

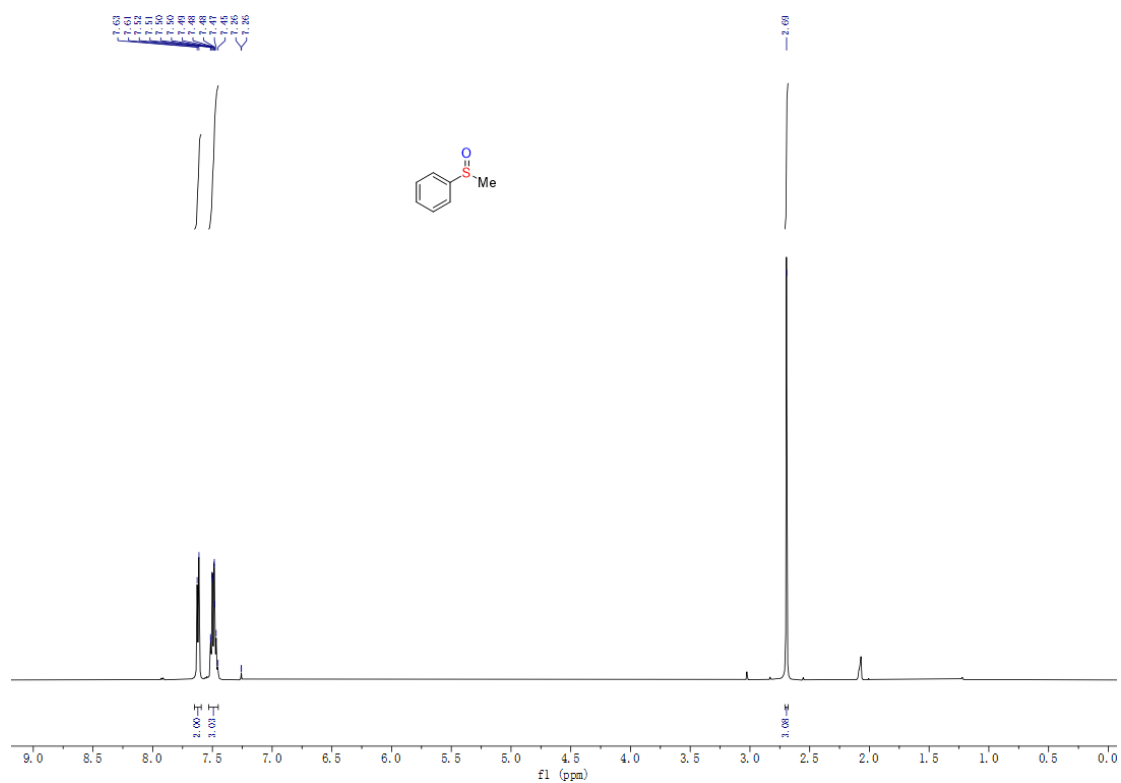

$^1\text{H}$  NMR of compound **2a**

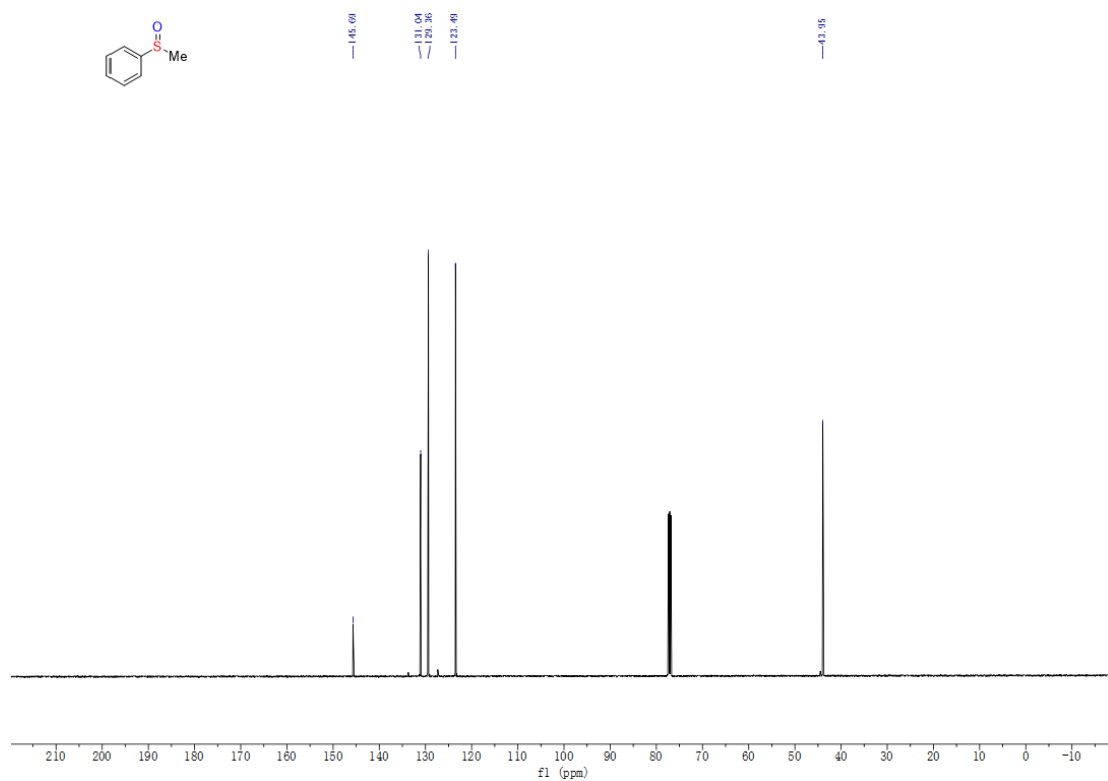

$^{13}\text{C}$  NMR of compound **2a**

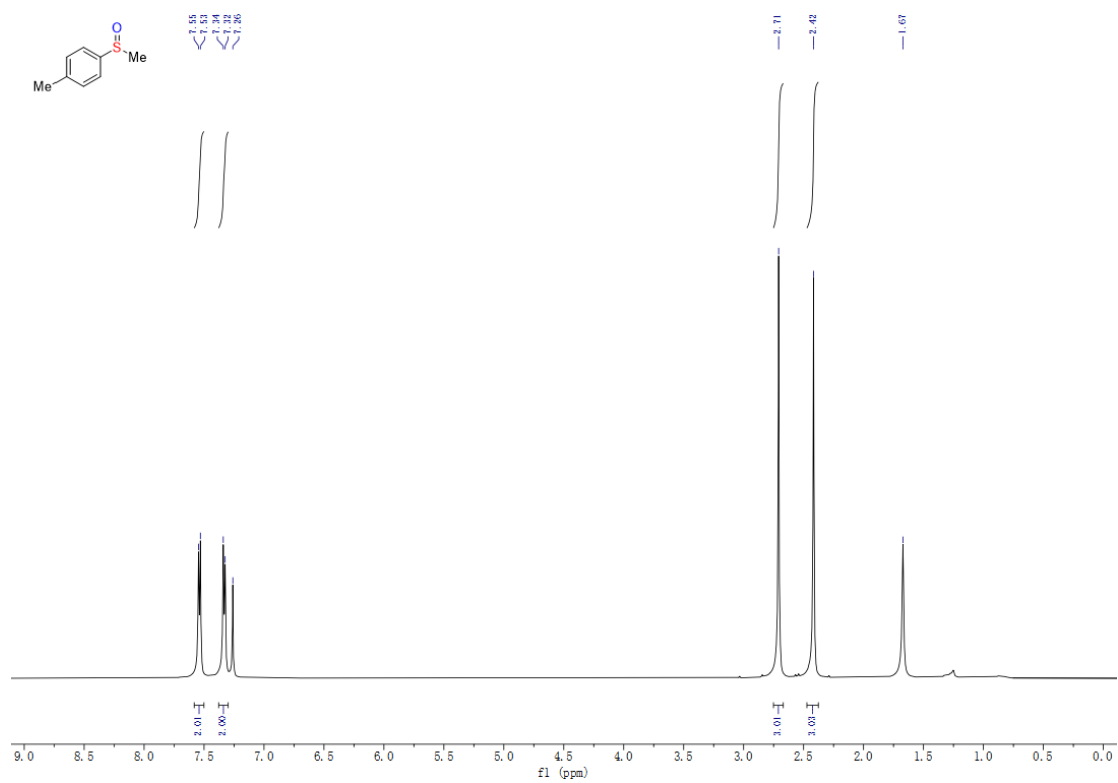

<sup>1</sup>H NMR of compound **2b**

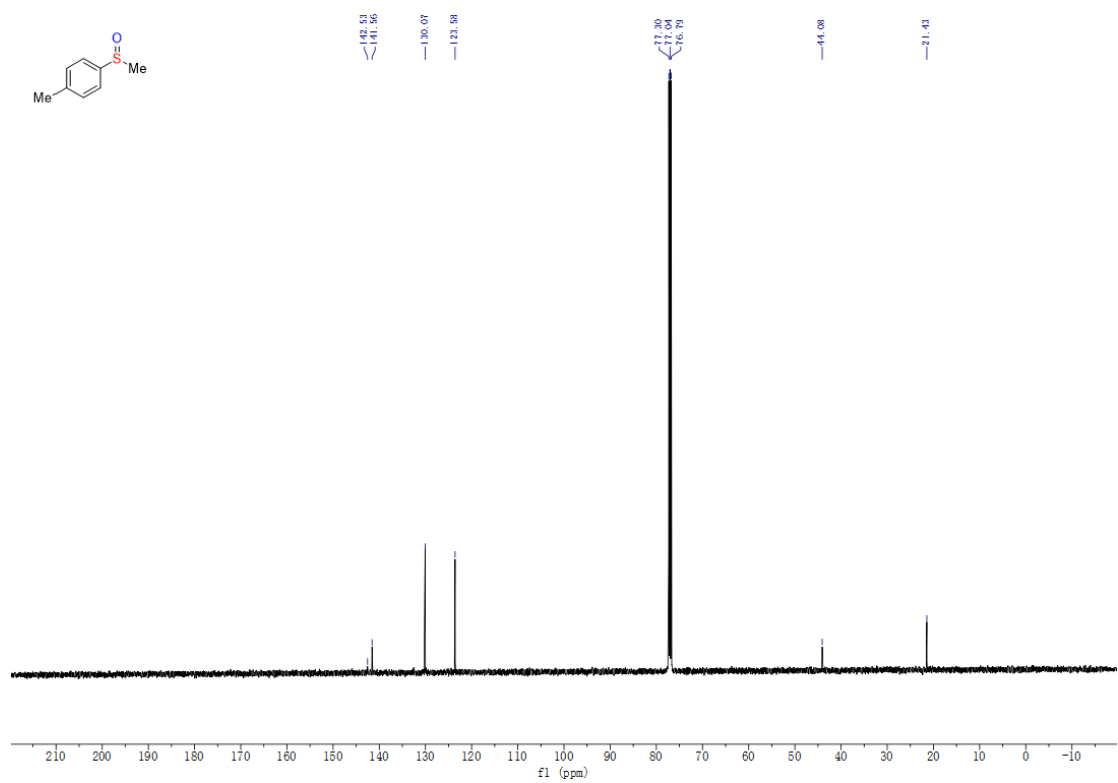

<sup>13</sup>C NMR of compound **2b**

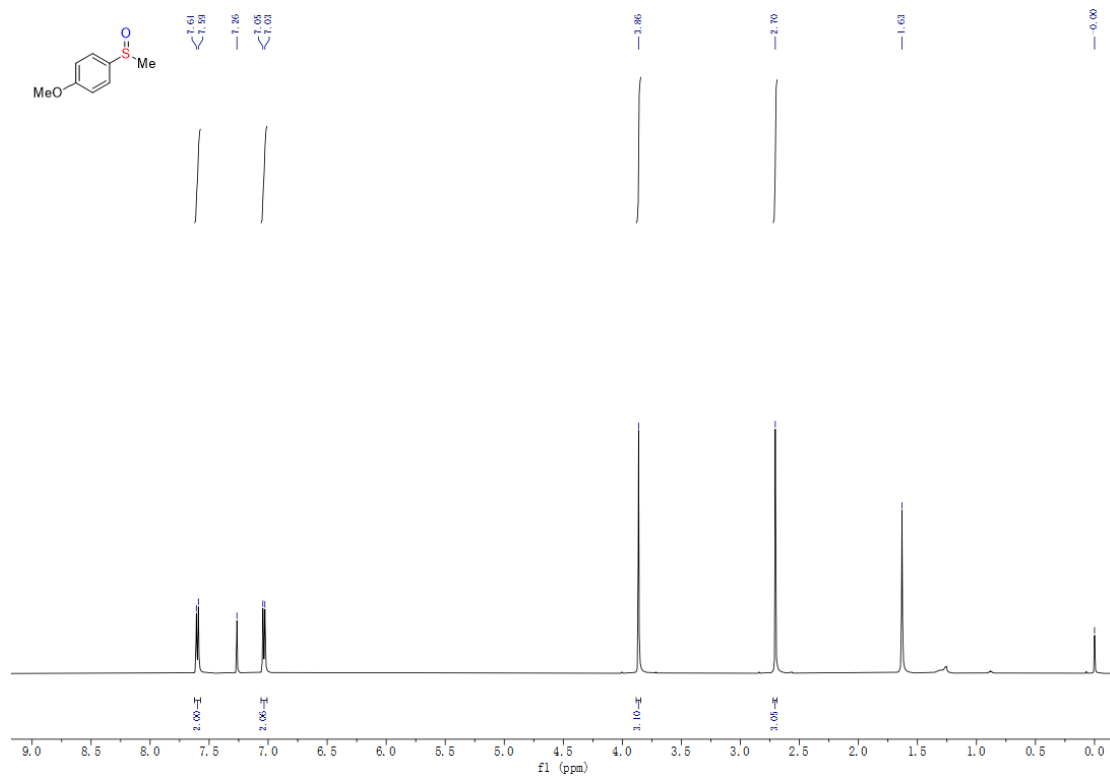

$^1\text{H}$  NMR of compound **2c**

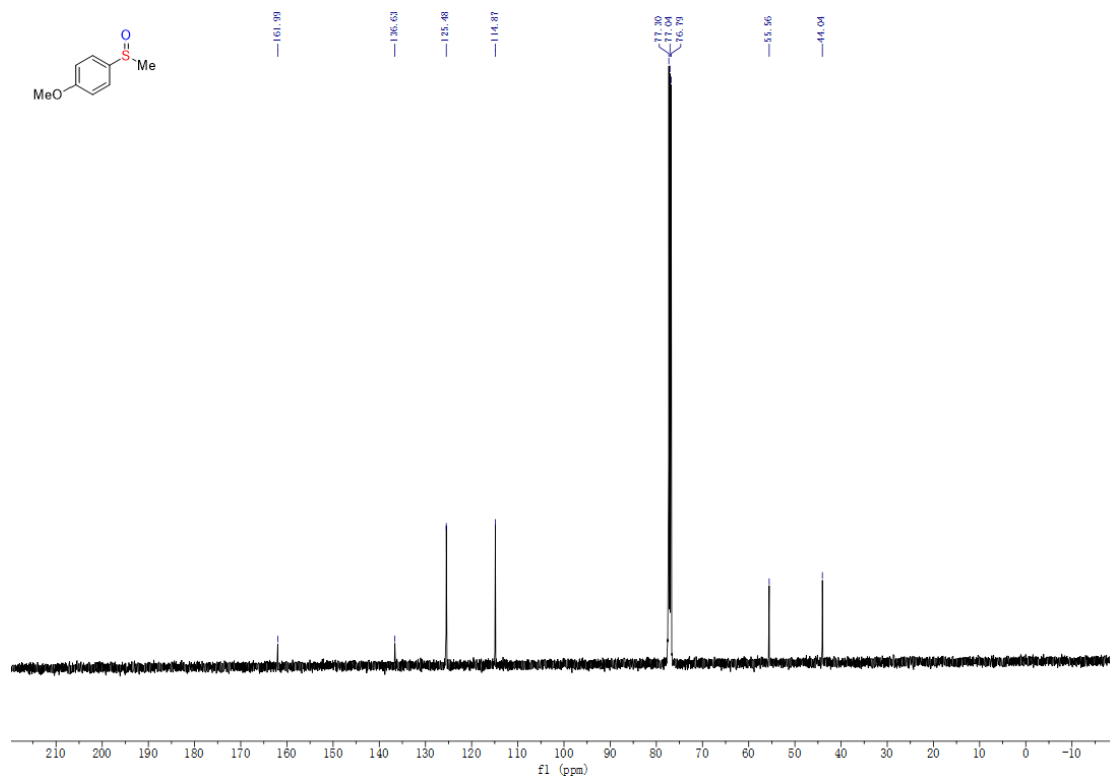

$^{13}\text{C}$  NMR of compound **2c**

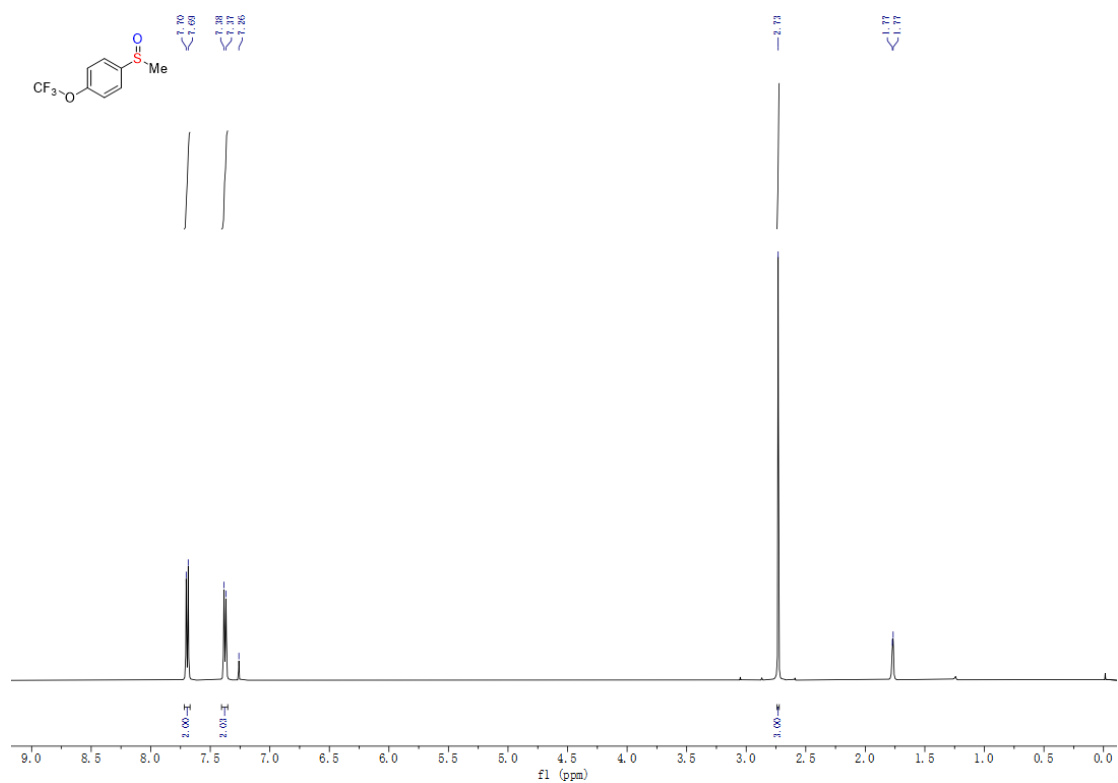

$^1\text{H}$  NMR of compound **2d**

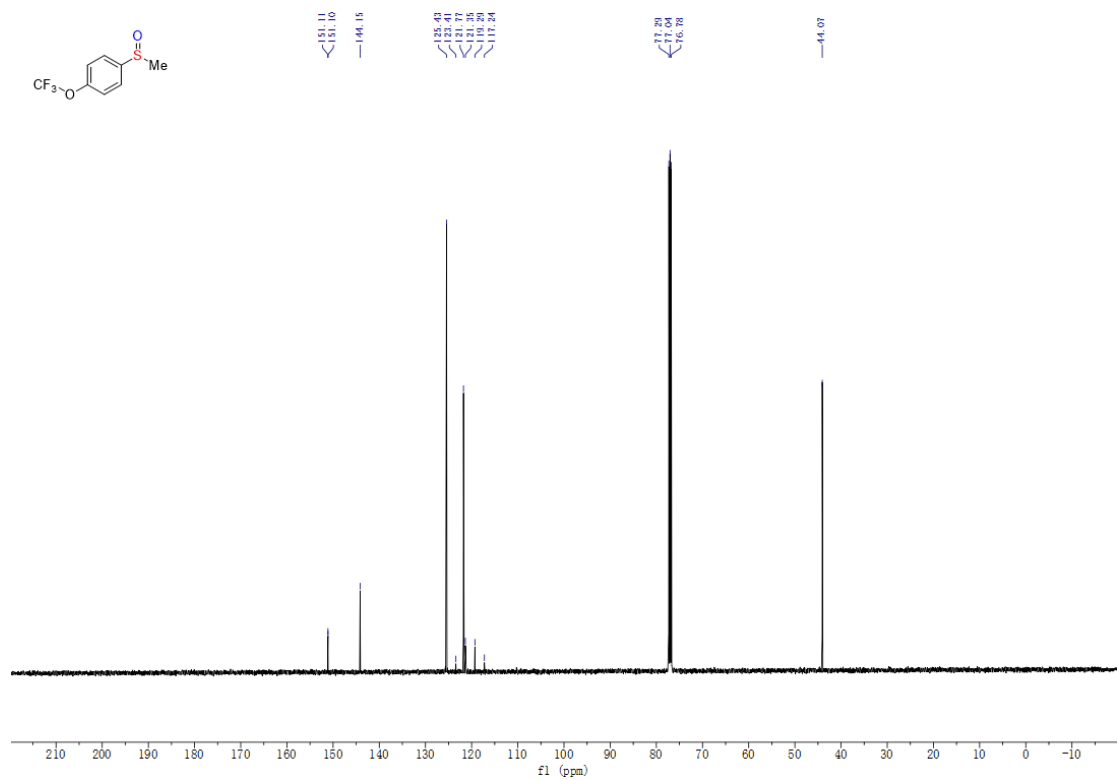

$^{13}\text{C}$  NMR of compound **2d**



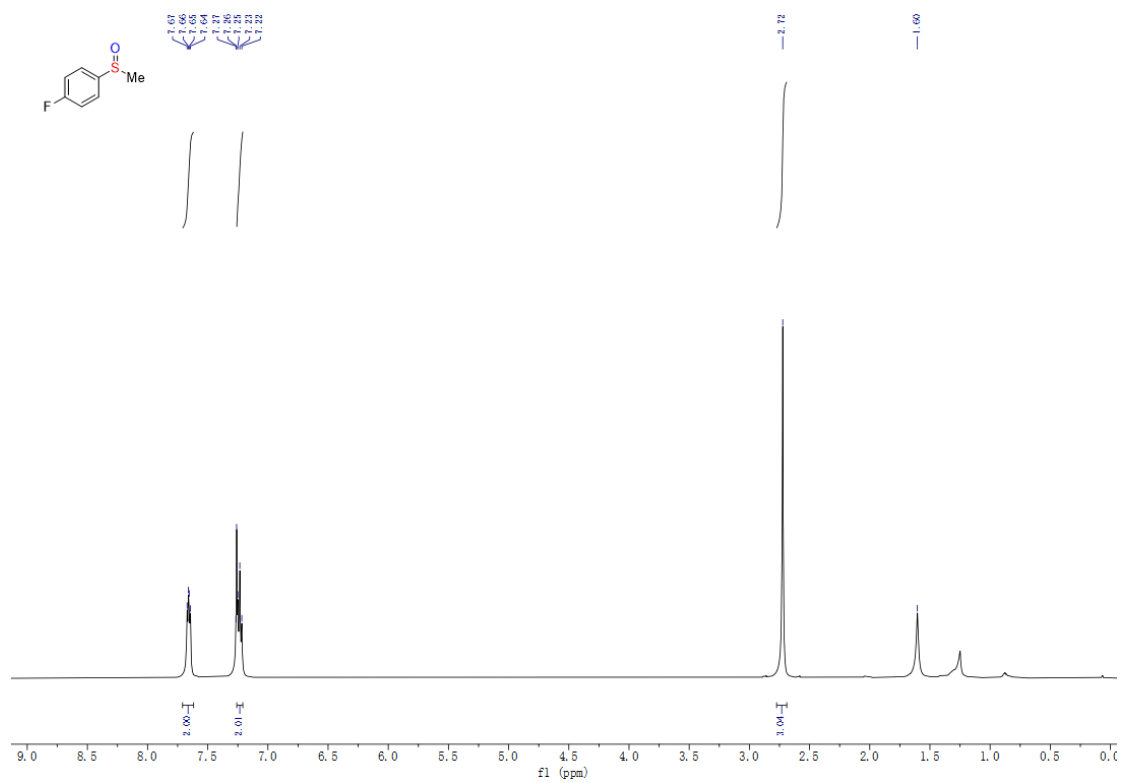

<sup>1</sup>H NMR of compound **2e**

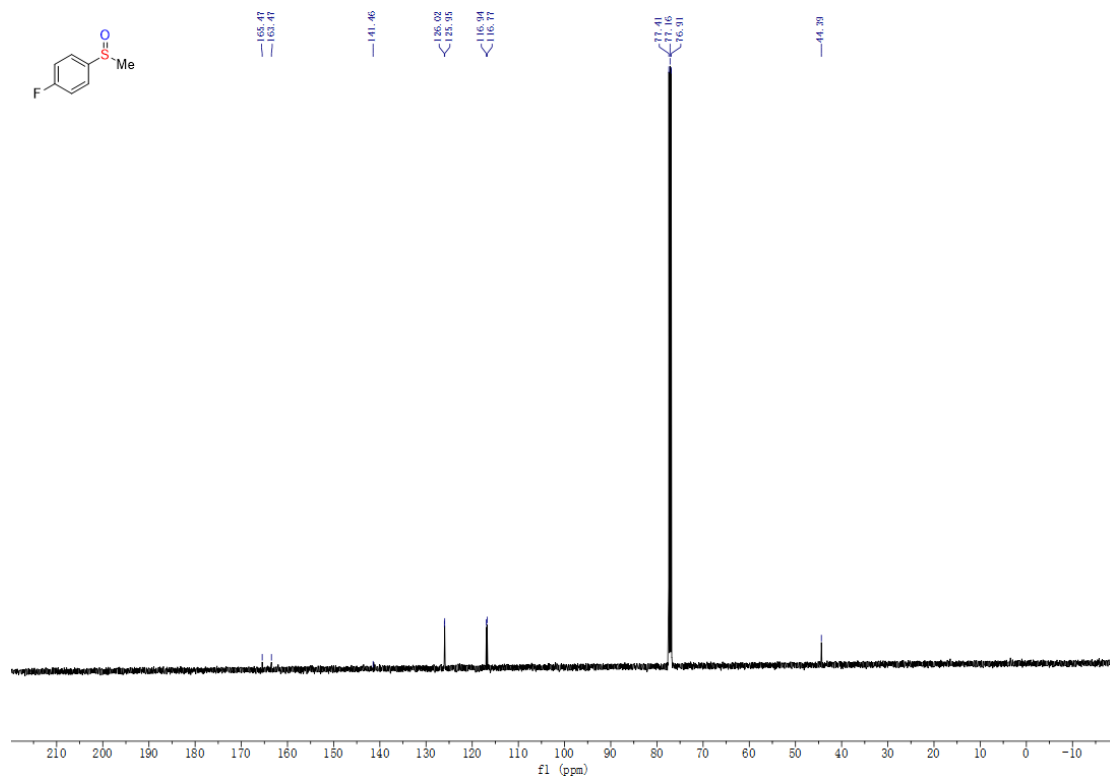

<sup>13</sup>C NMR of compound **2e**

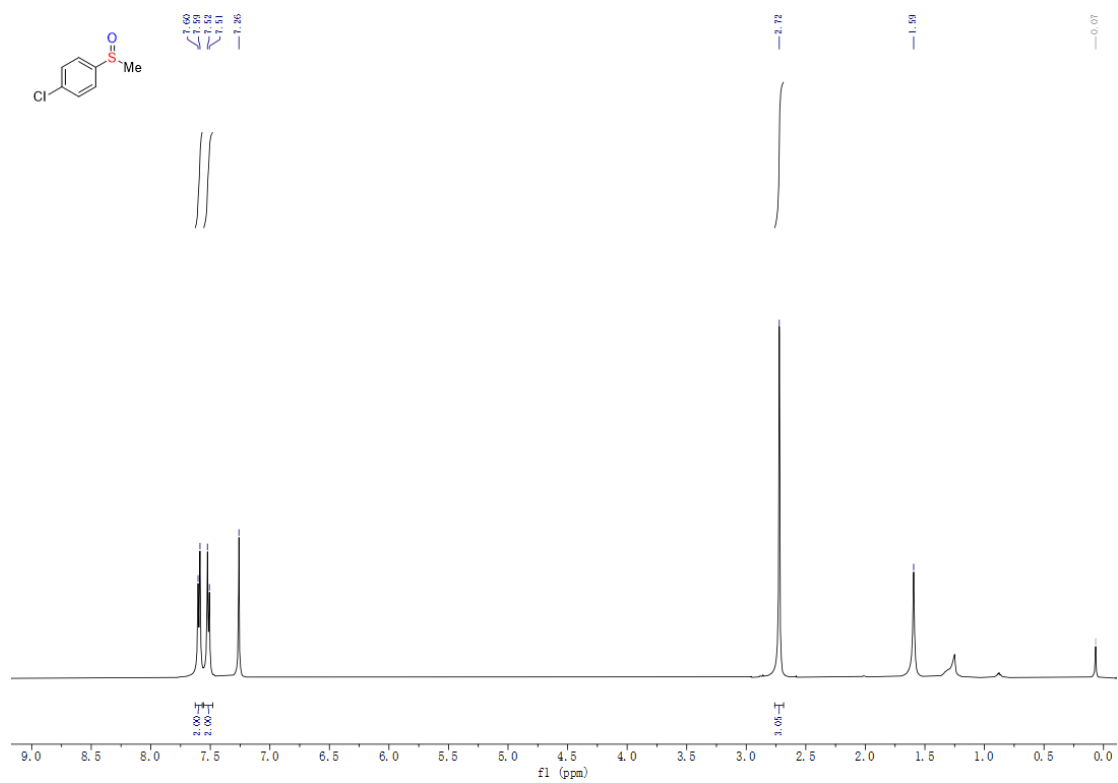

$^1\text{H}$  NMR of compound **2f**

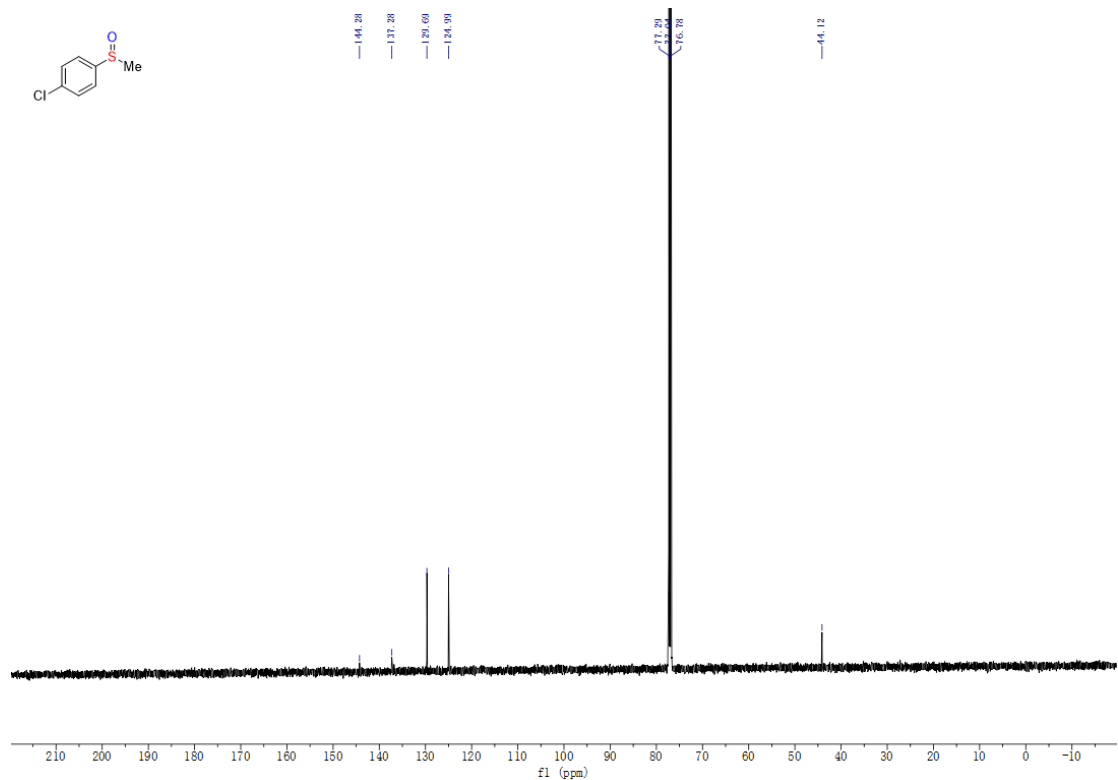

$^{13}\text{C}$  NMR of compound **2f**

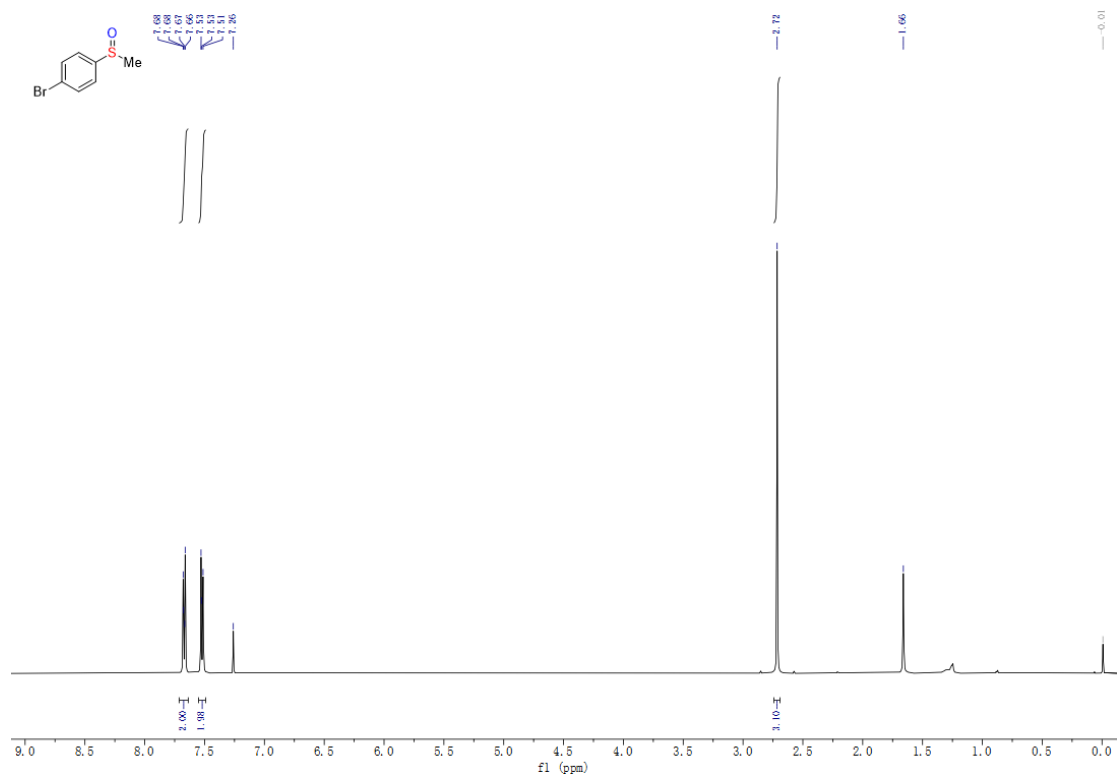

<sup>1</sup>H NMR of compound **2g**

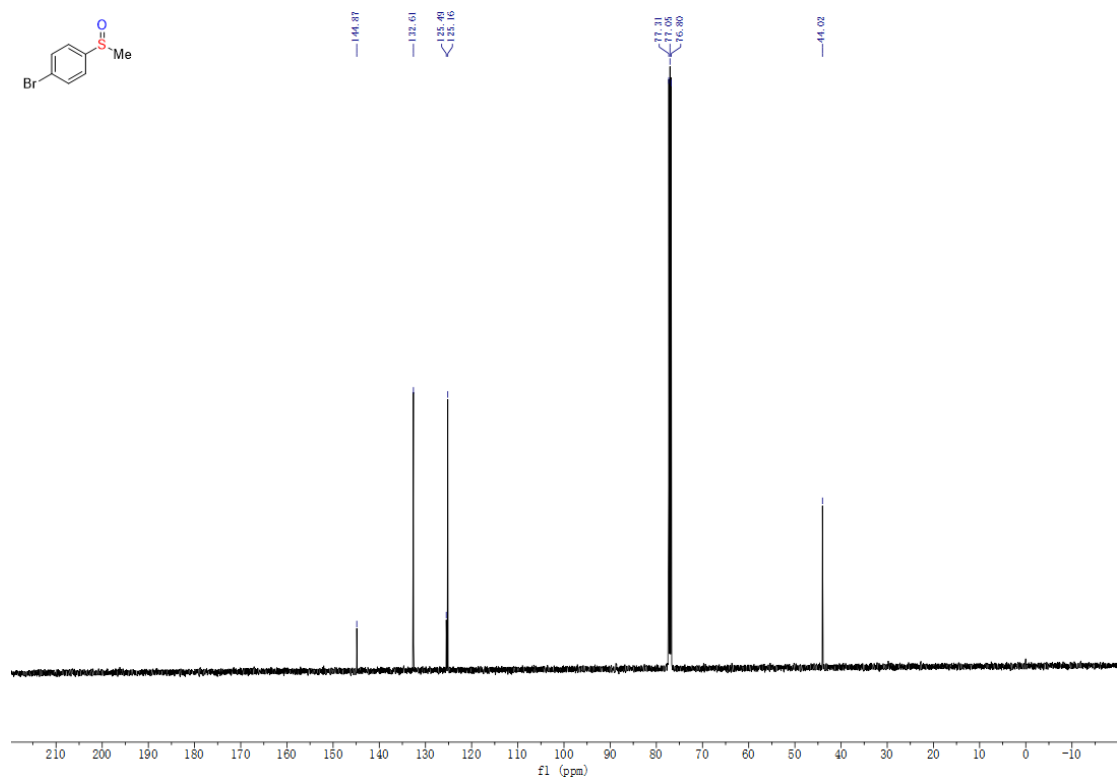

<sup>13</sup>C NMR of compound **2g**

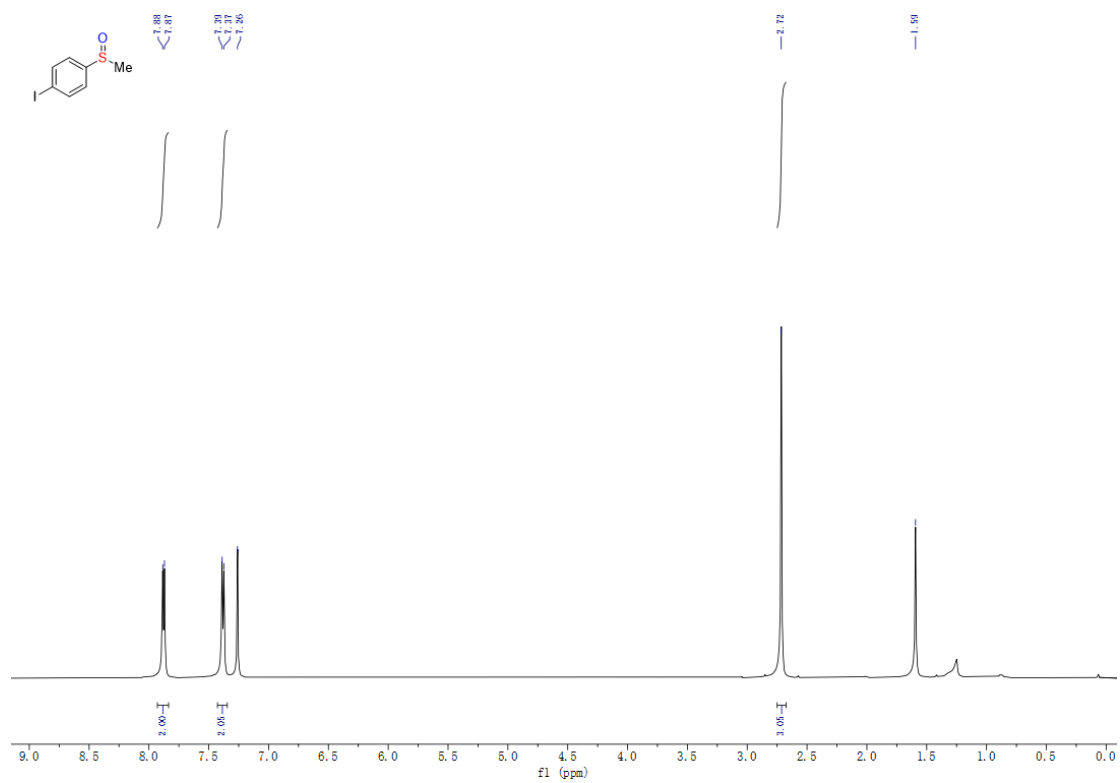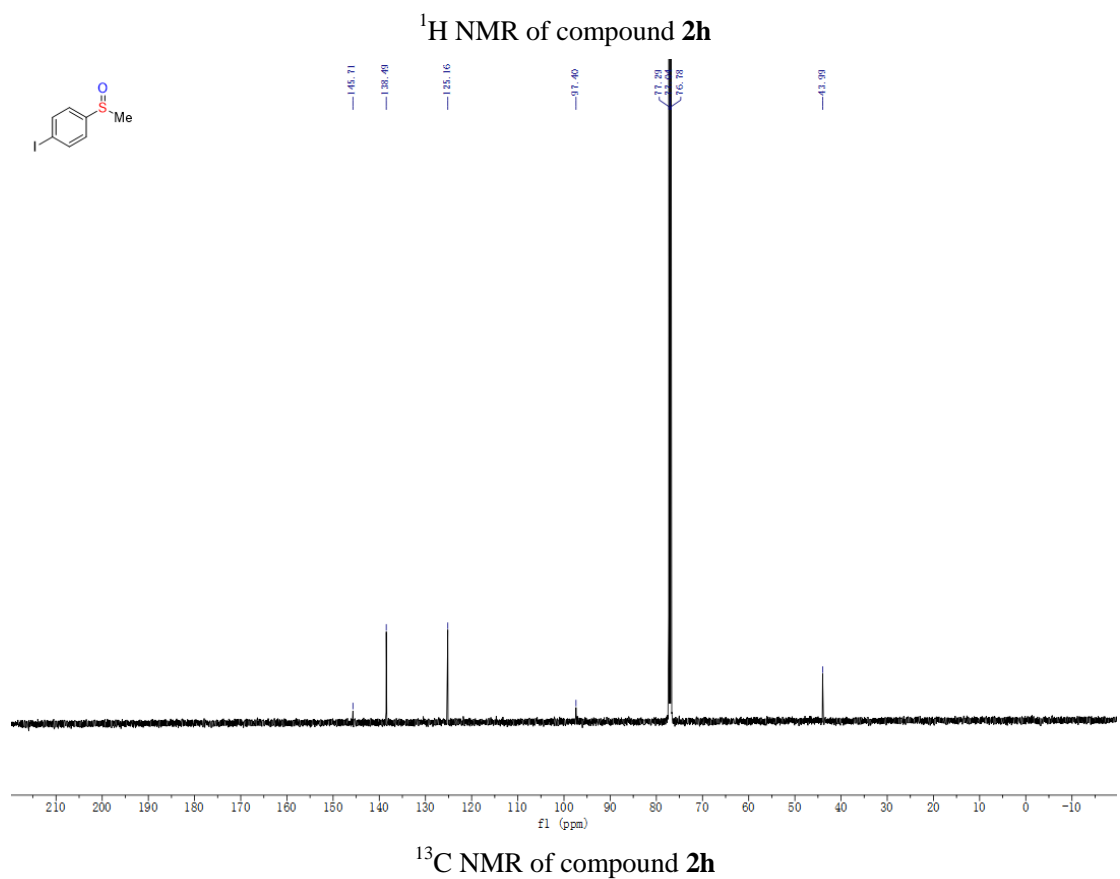

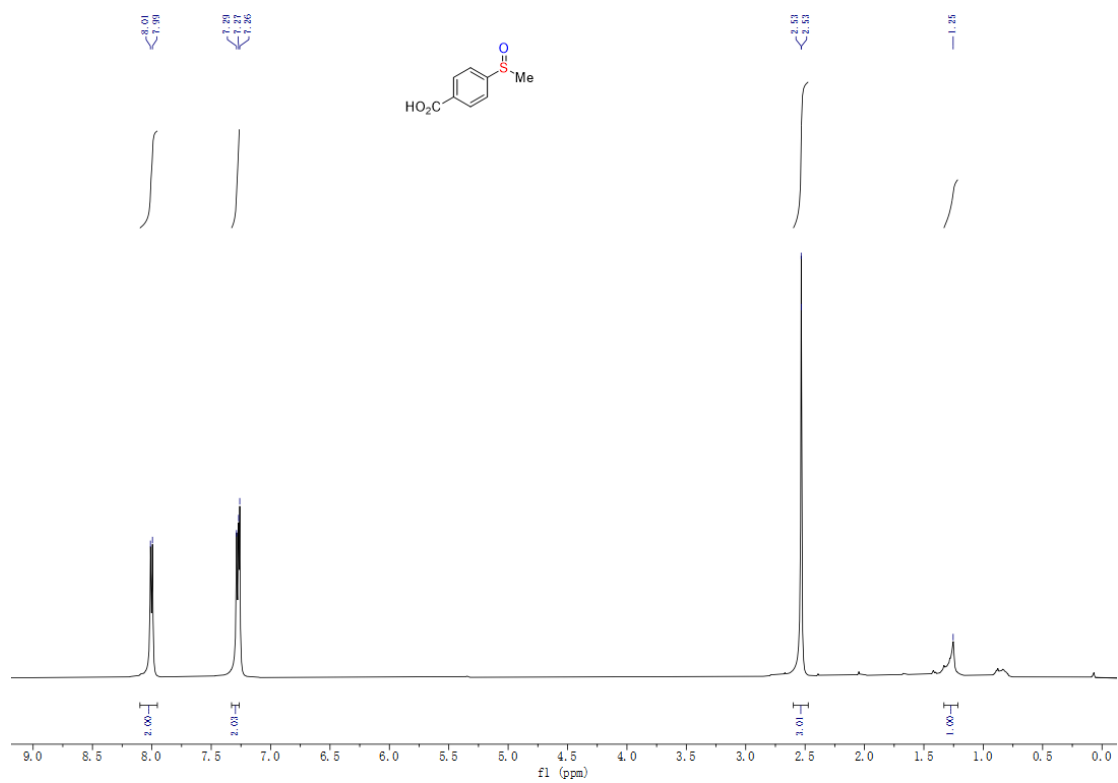

<sup>1</sup>H NMR of compound **2i**

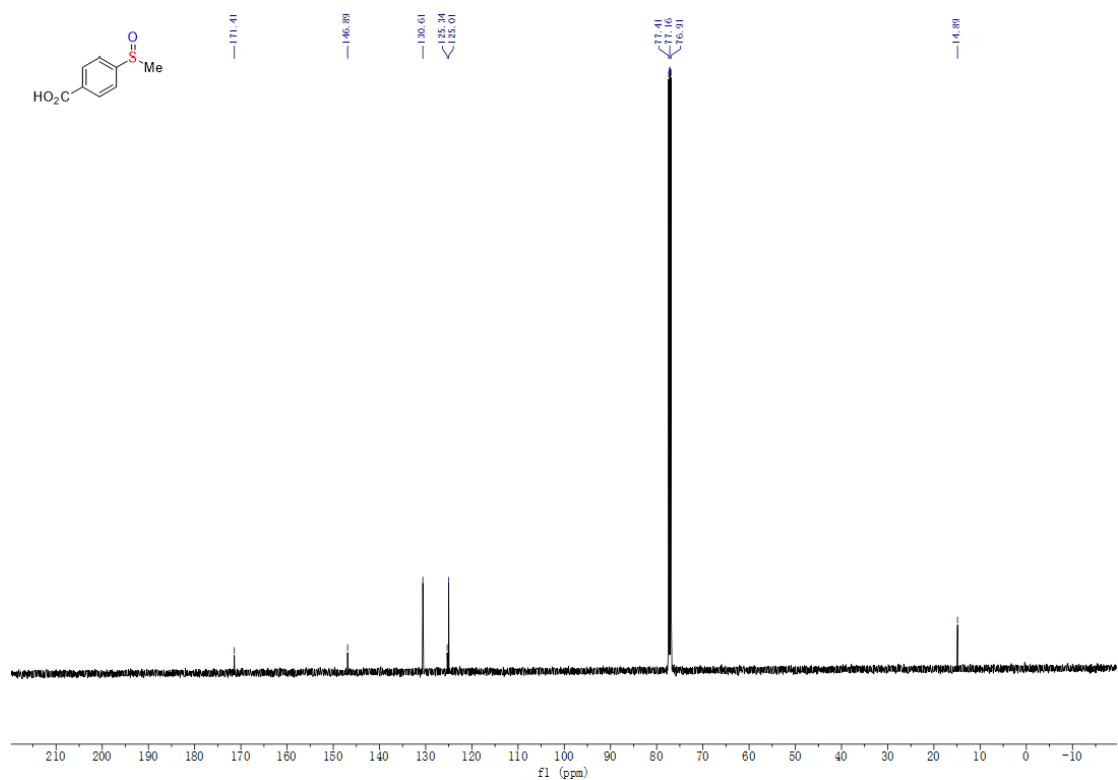

<sup>13</sup>C NMR of compound **2i**

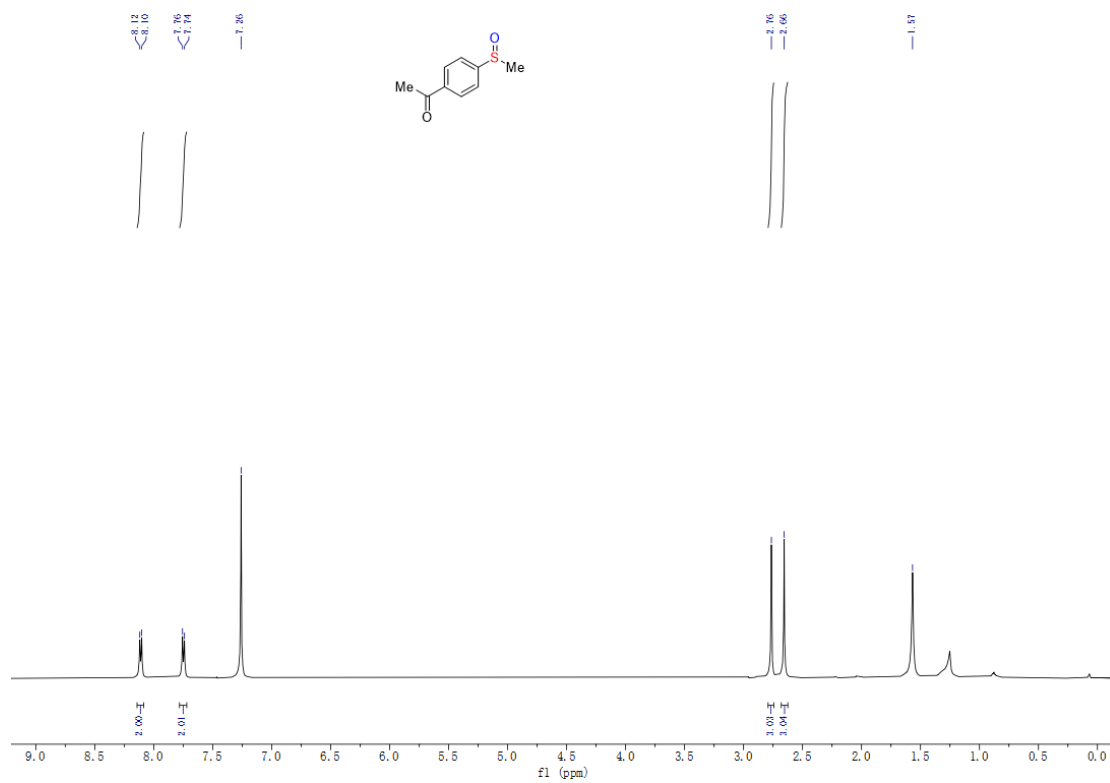

<sup>1</sup>H NMR of compound **2j**

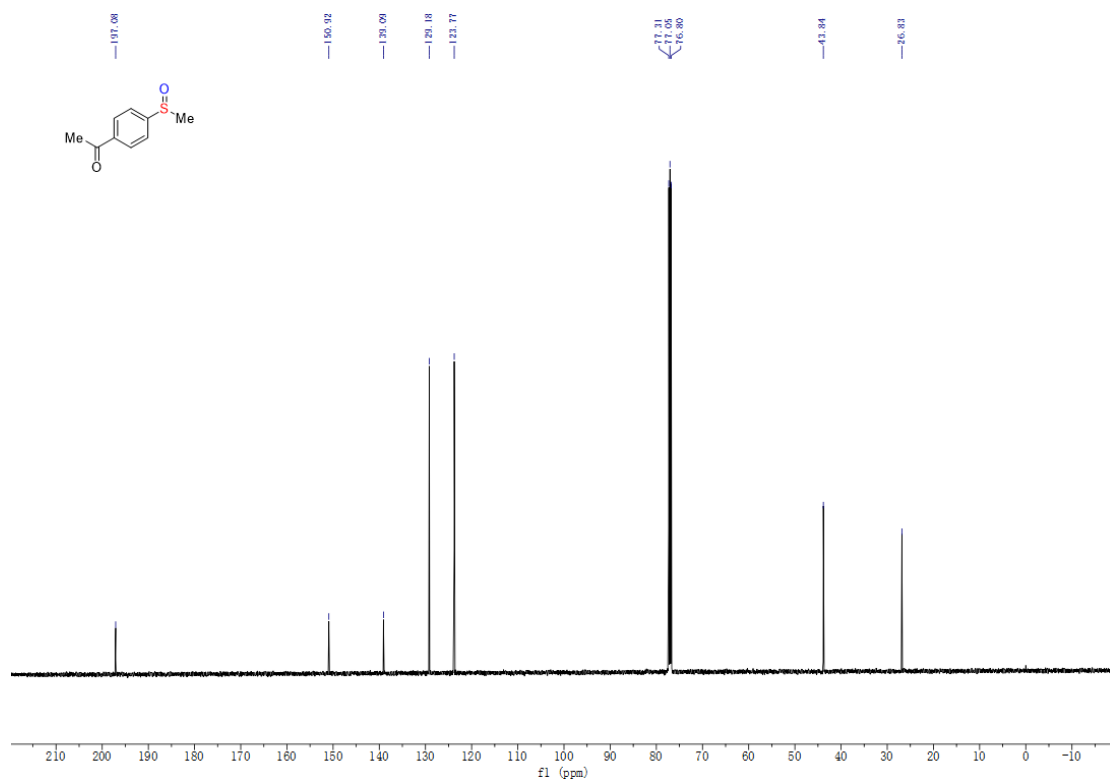

<sup>13</sup>C NMR of compound **2j**

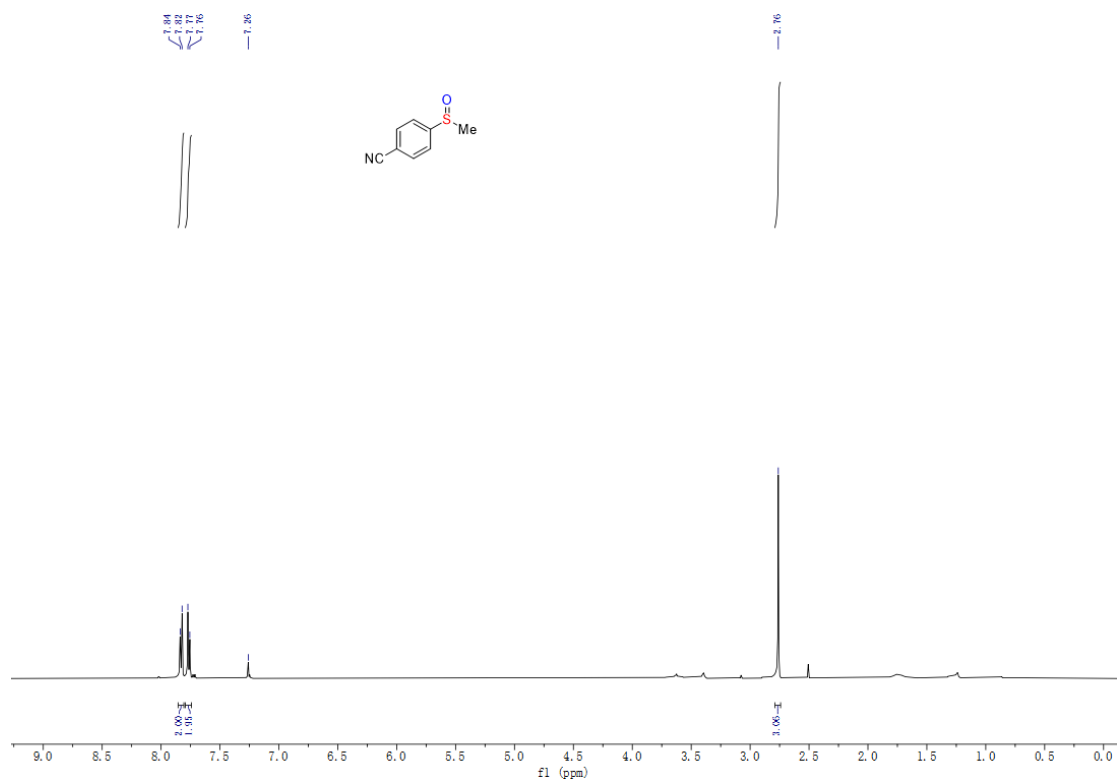

<sup>1</sup>H NMR of compound **2k**

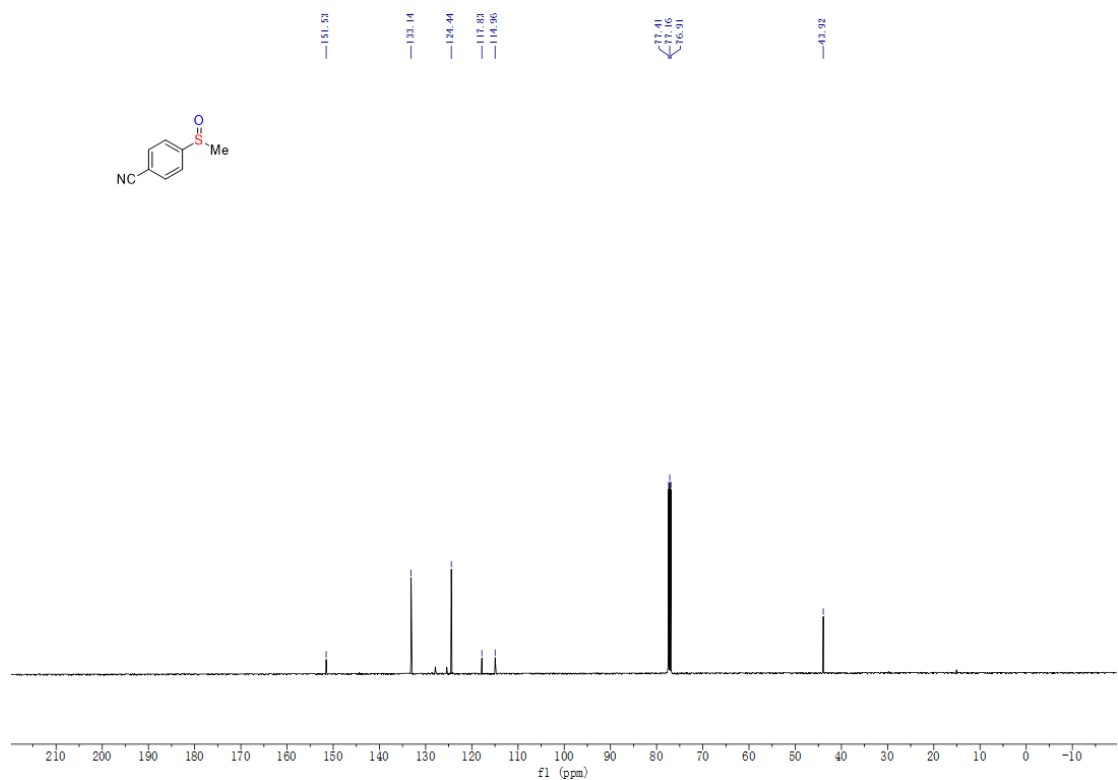

<sup>13</sup>C NMR of compound **2k**

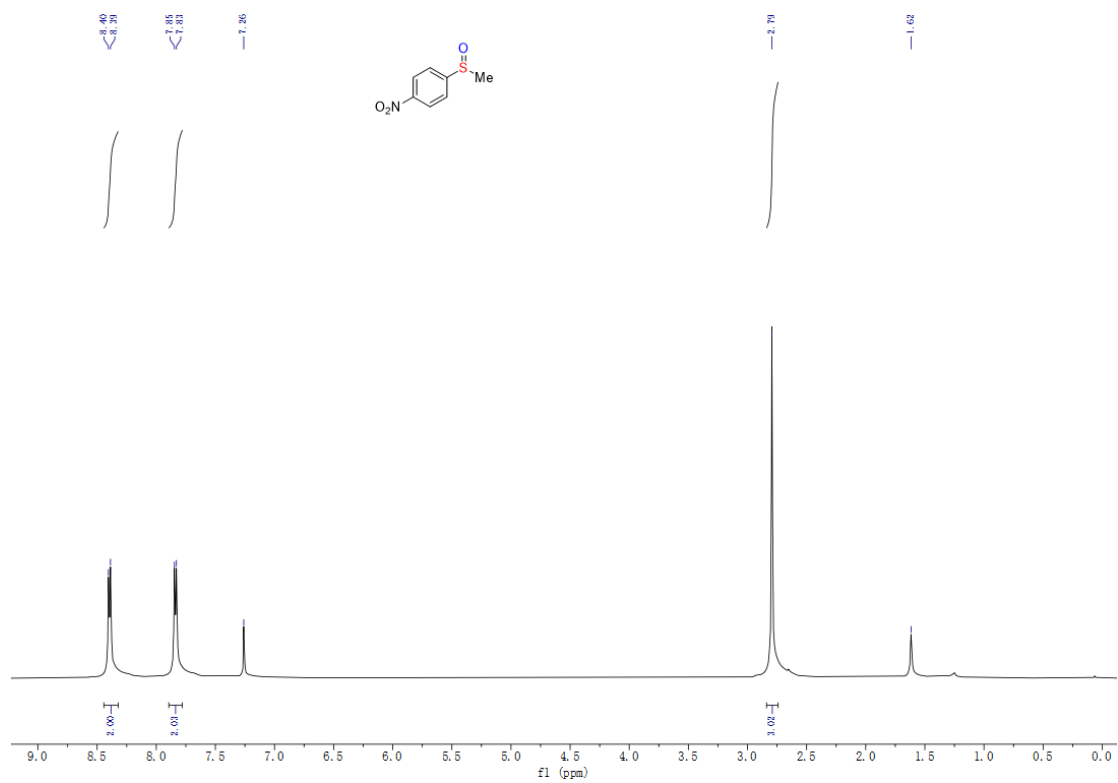

$^1\text{H}$  NMR of compound **21**

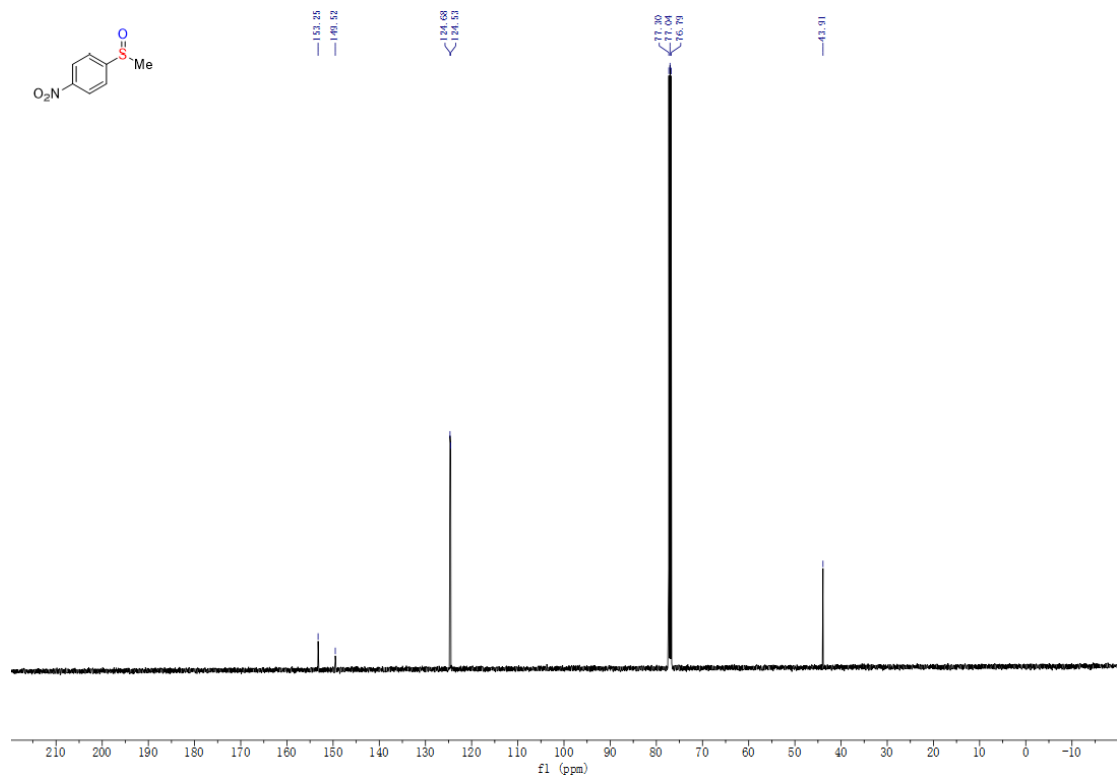

$^{13}\text{C}$  NMR of compound **21**



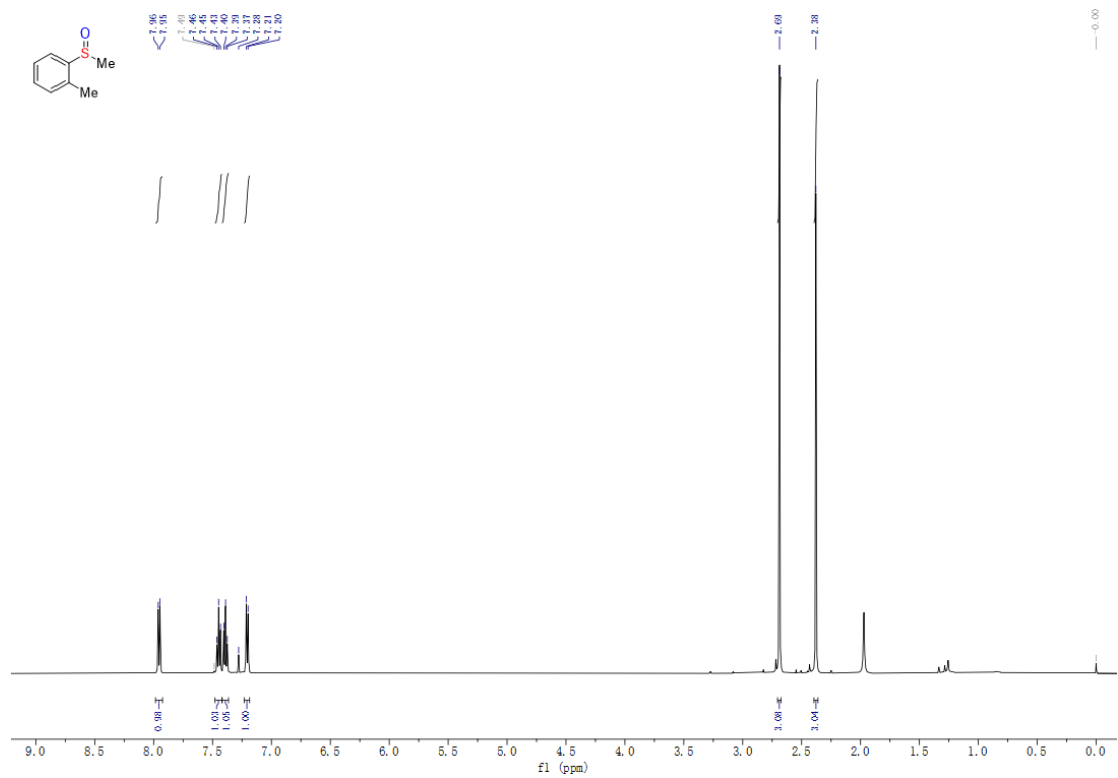

<sup>1</sup>H NMR of compound **2m**

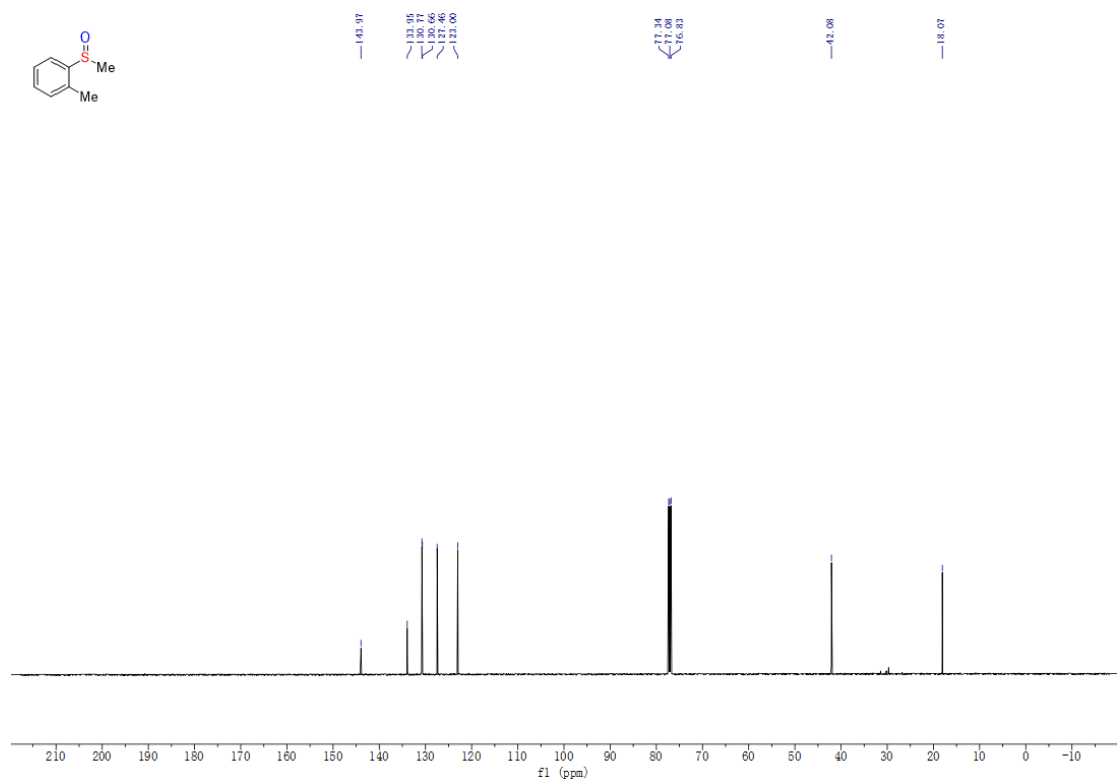

<sup>13</sup>C NMR of compound **2m**

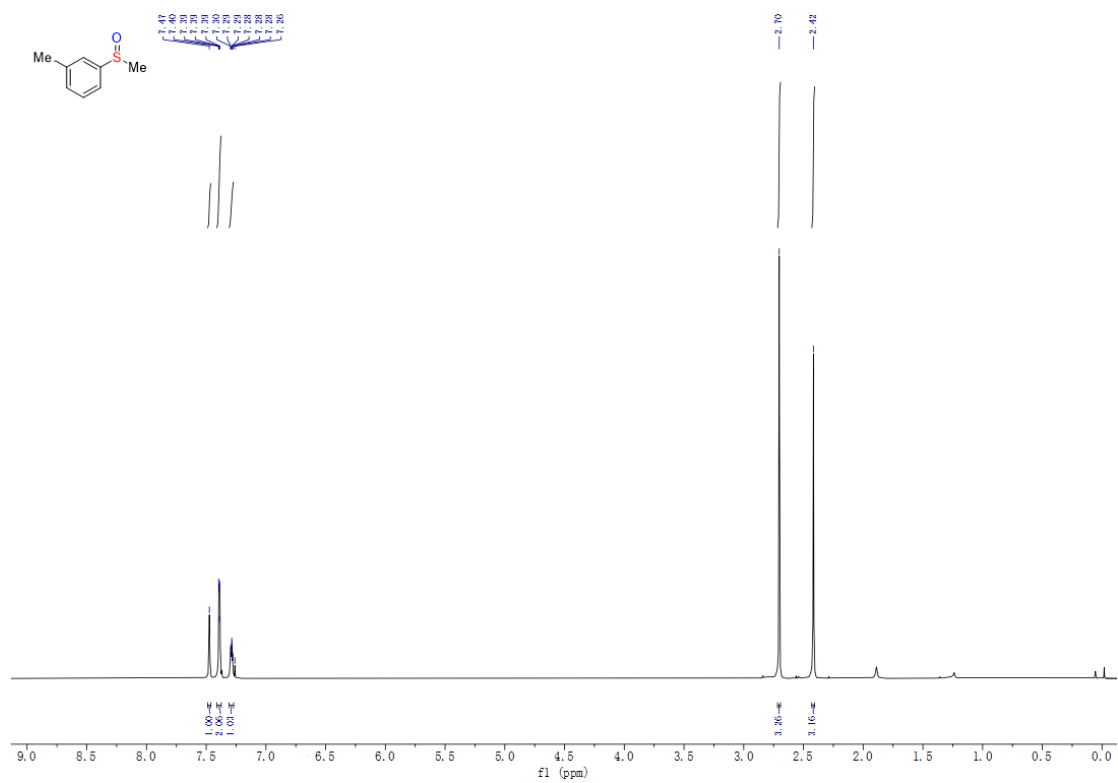

<sup>1</sup>H NMR of compound 2n

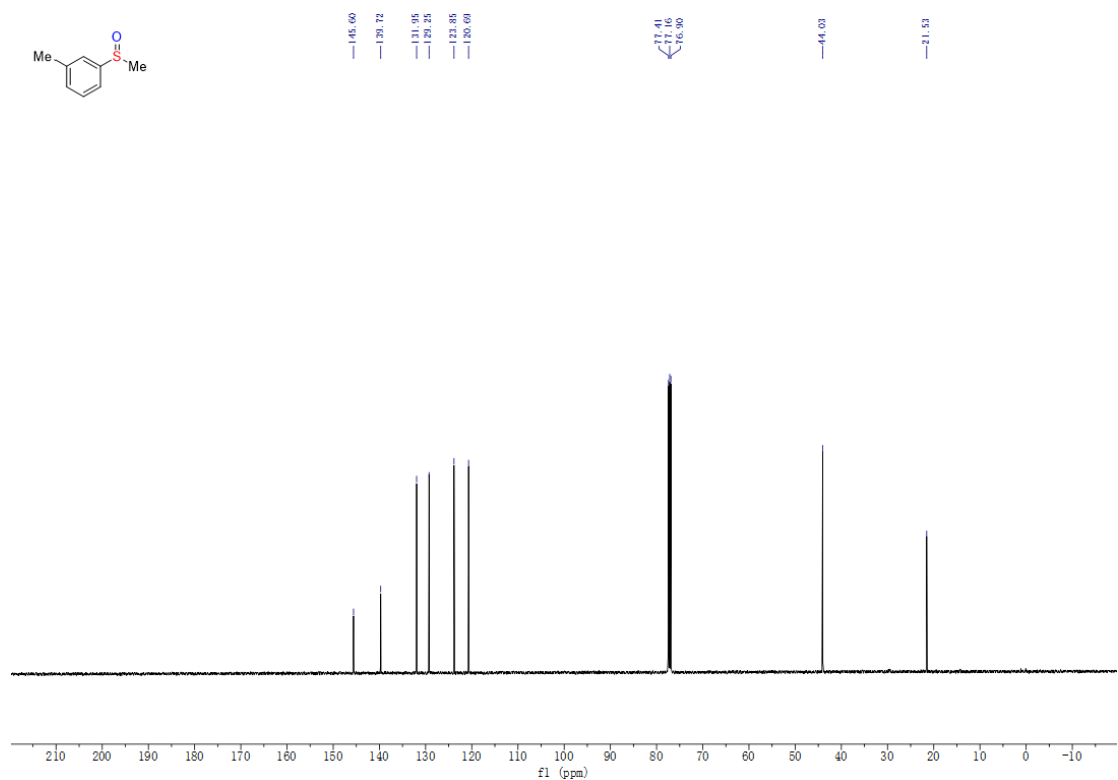

<sup>13</sup>C NMR of compound 2n

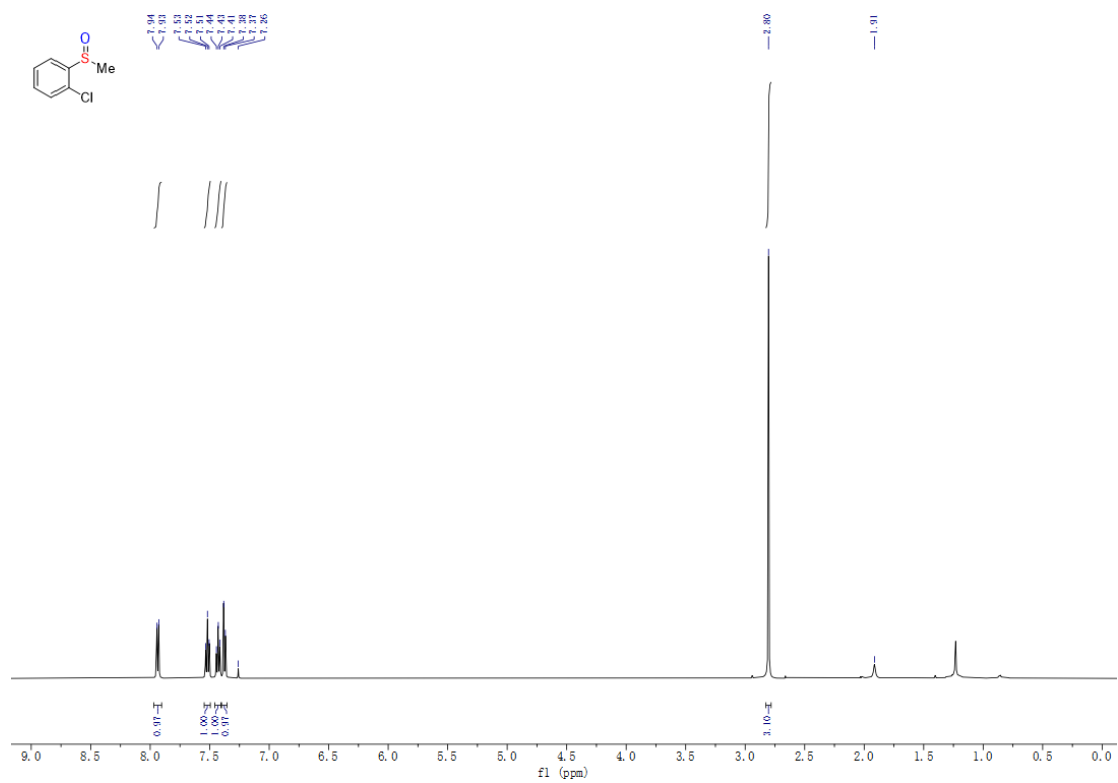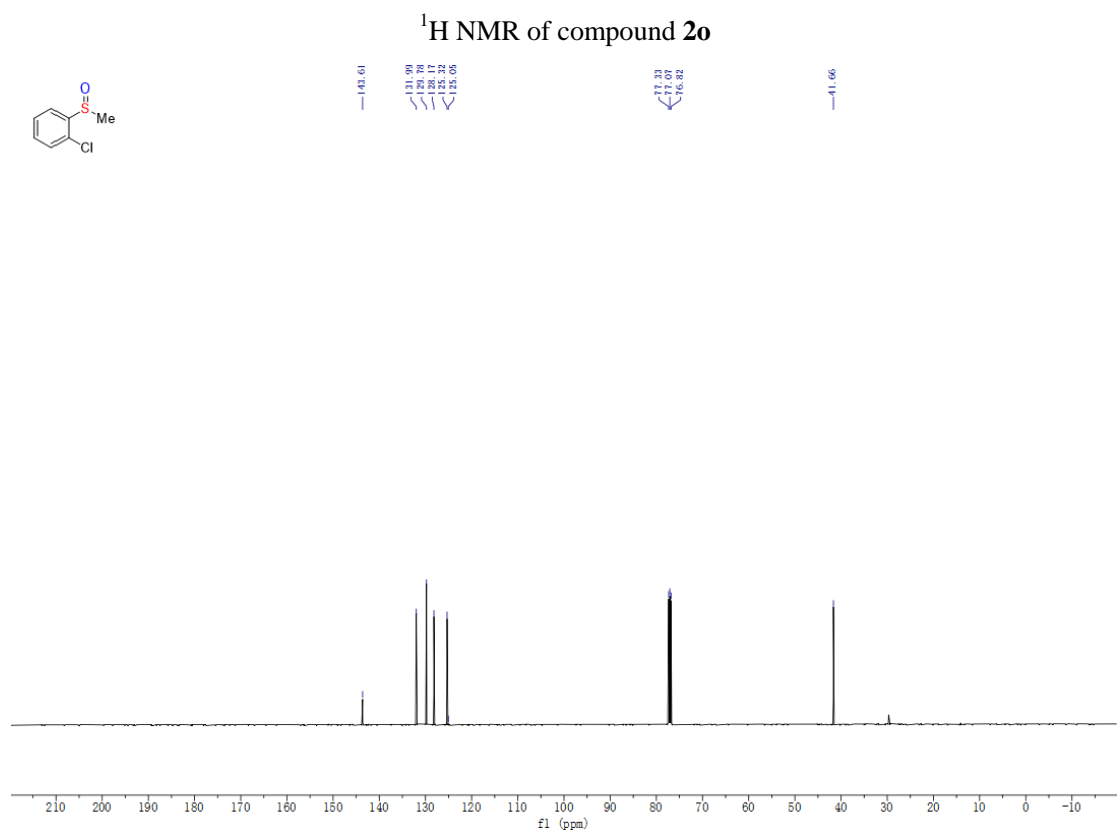

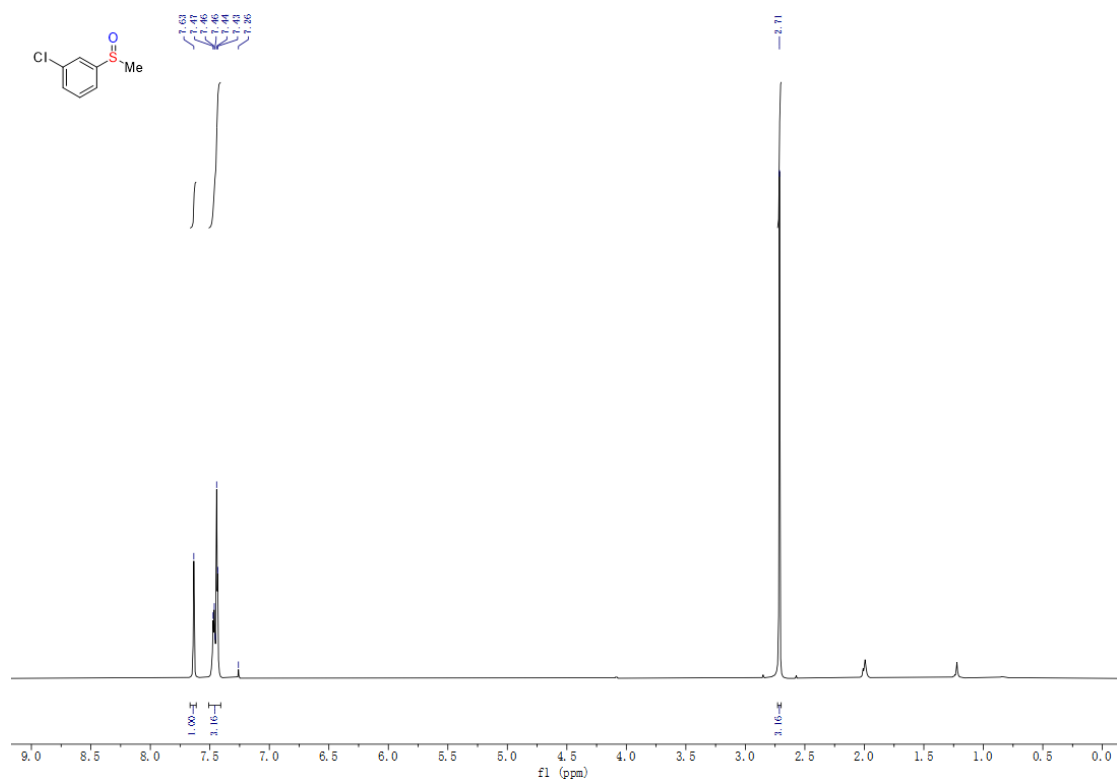

<sup>1</sup>H NMR of compound **2p**

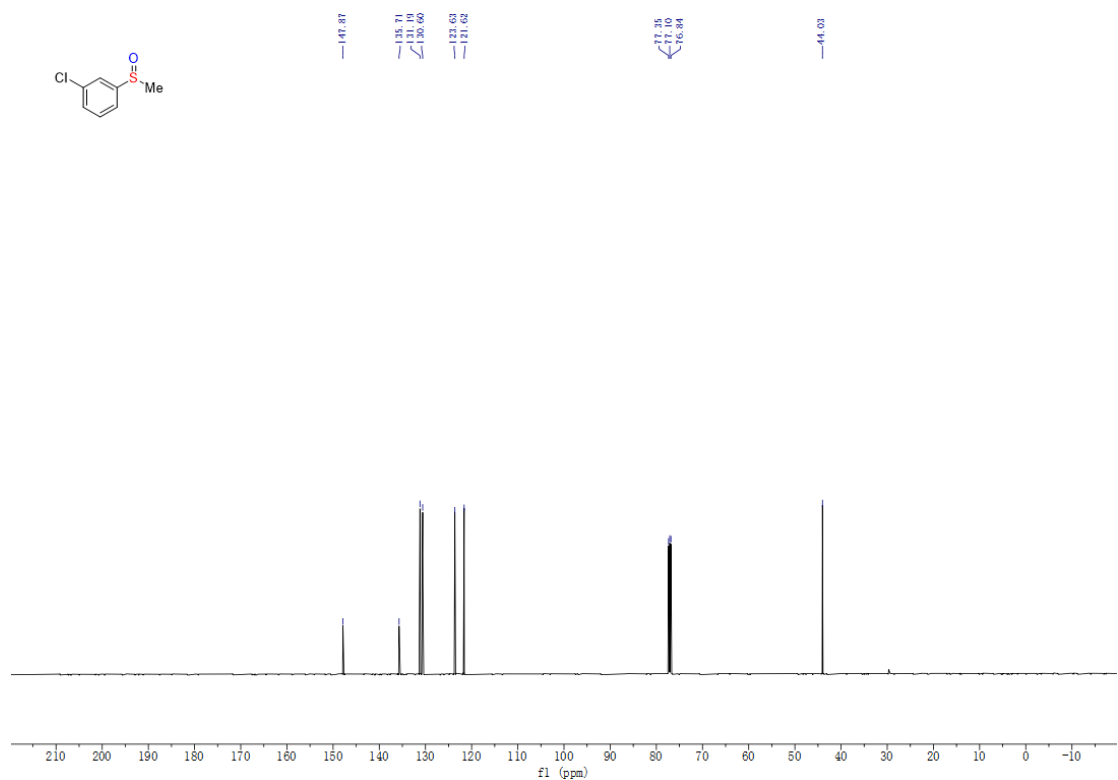

<sup>13</sup>C NMR of compound **2p**

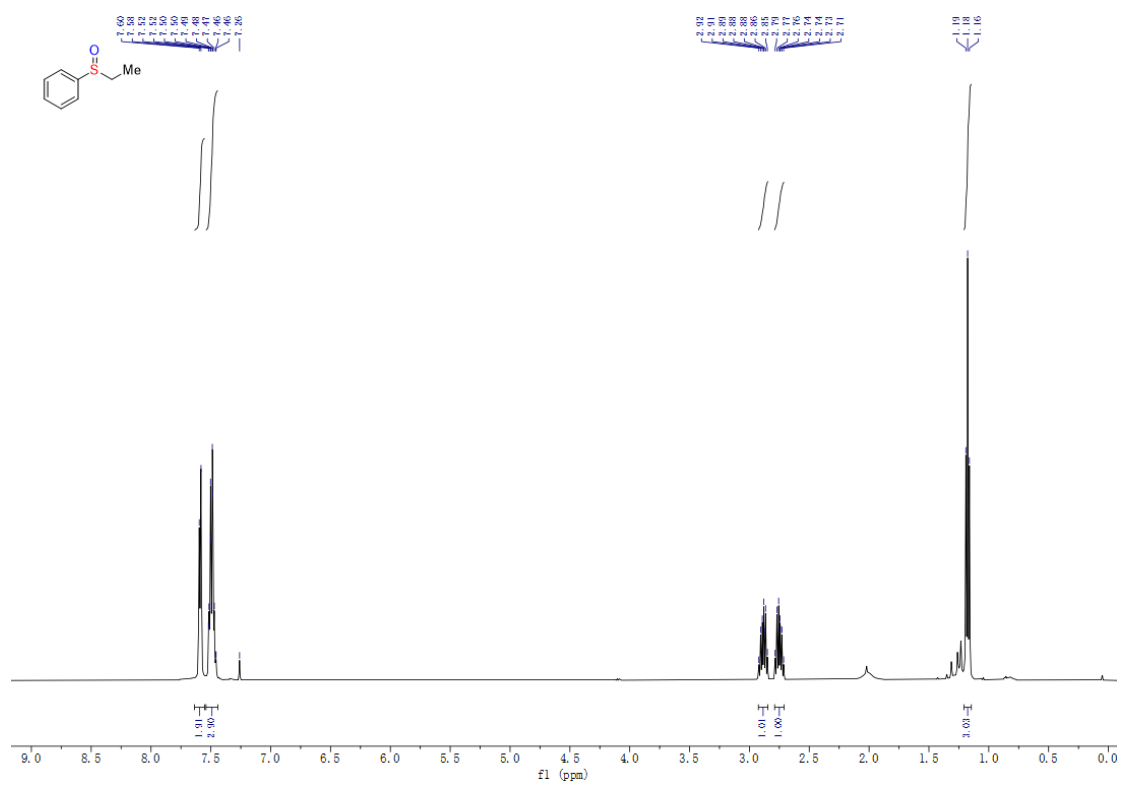

<sup>1</sup>H NMR of compound **2q**

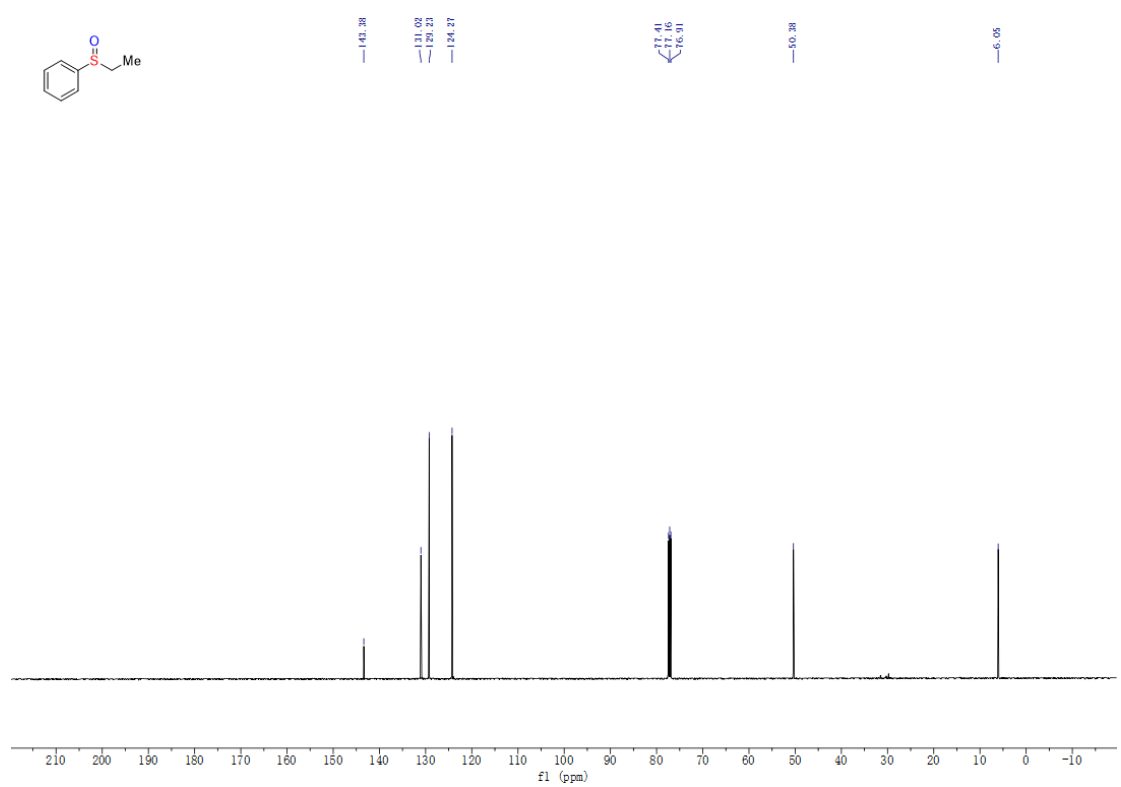

<sup>13</sup>C NMR of compound **2q**

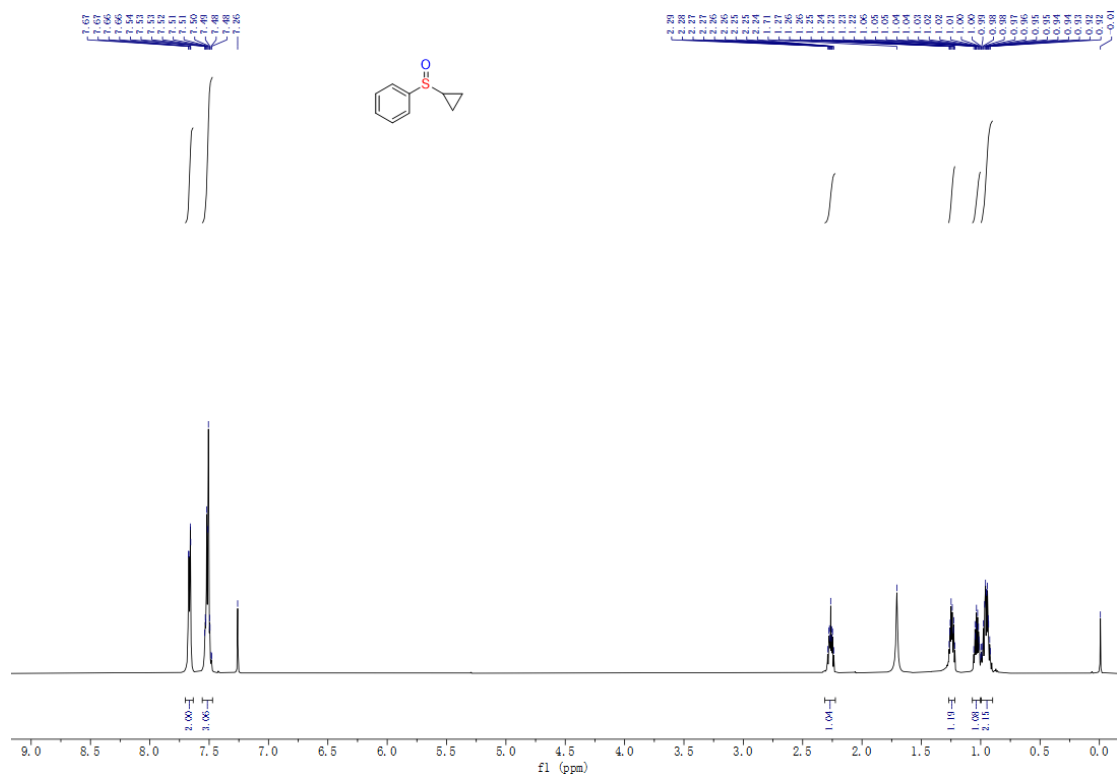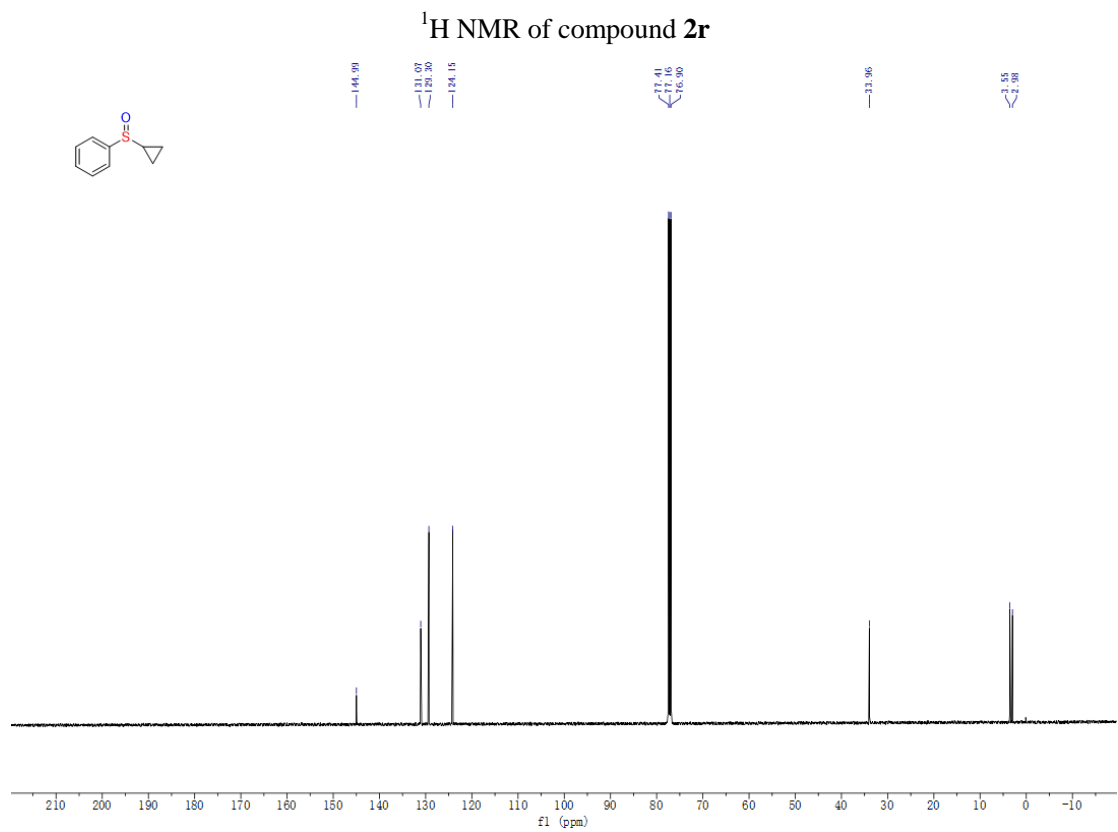

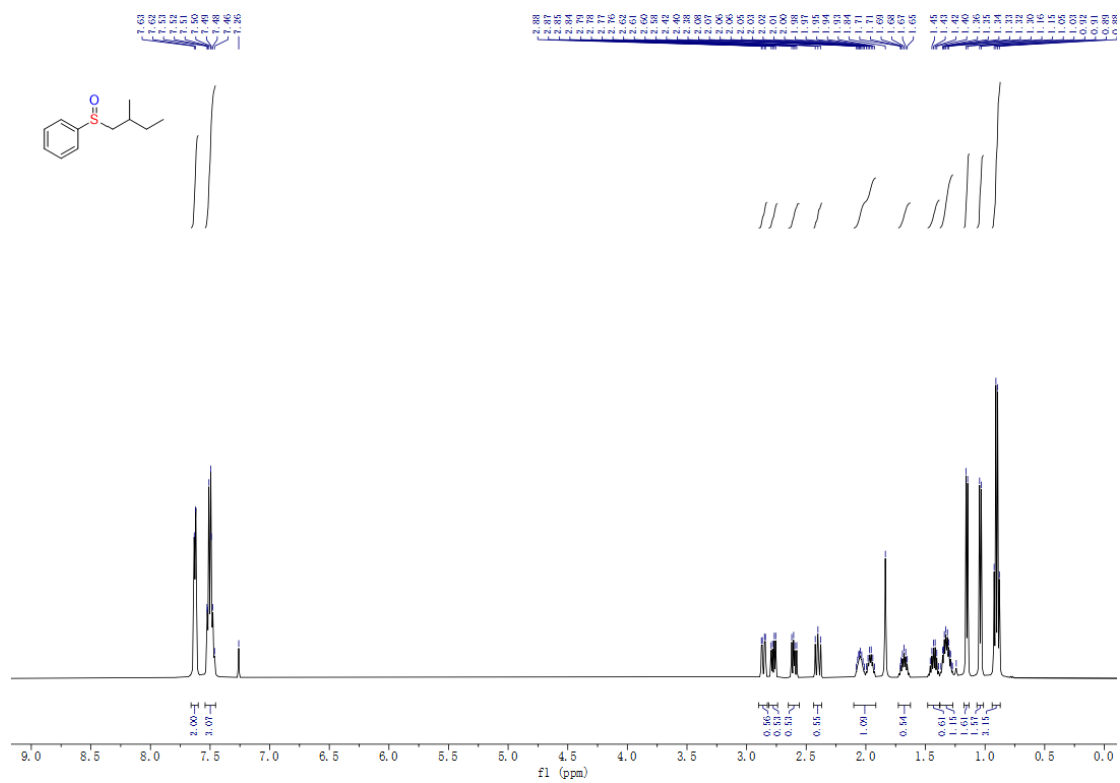

**<sup>1</sup>H NMR of compound 2s**

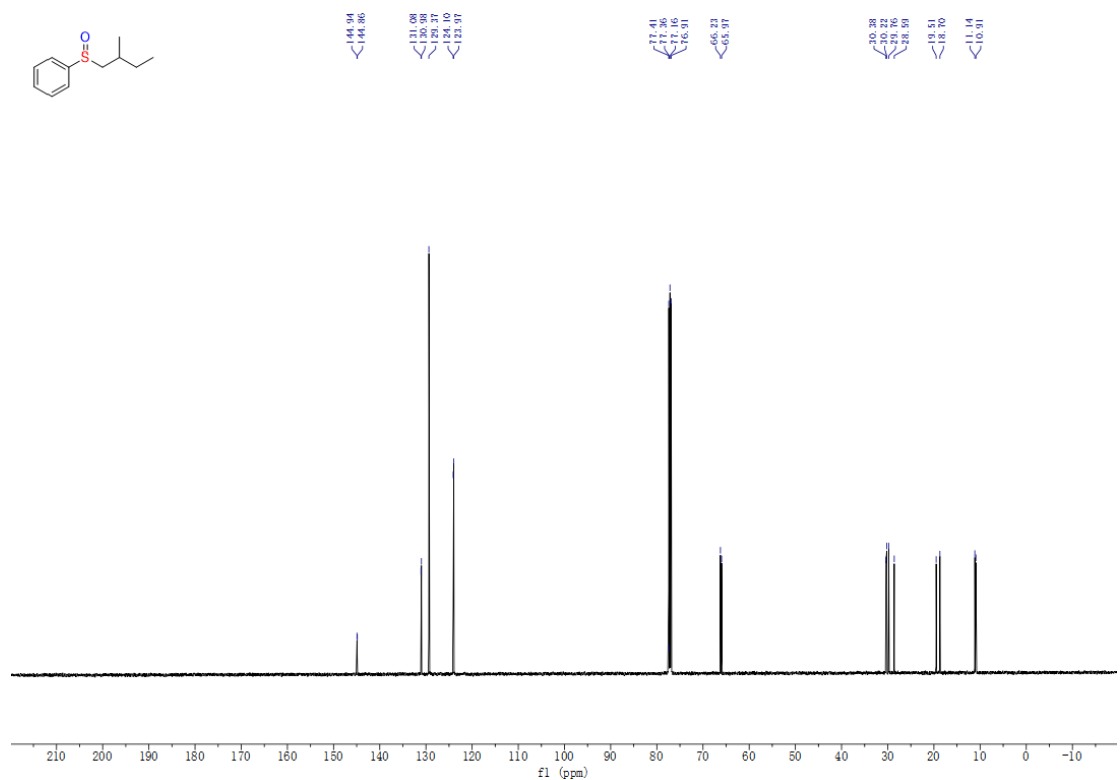

**<sup>13</sup>C NMR of compound 2s**

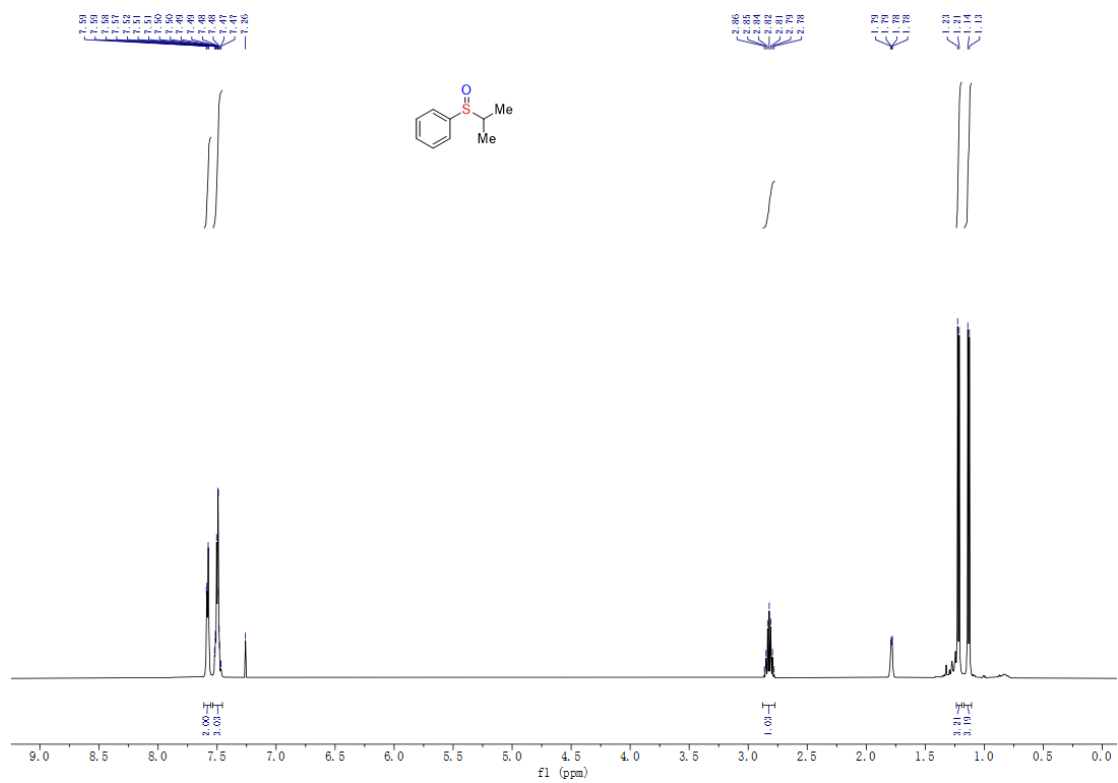

$^1\text{H NMR}$  of compound **2t**

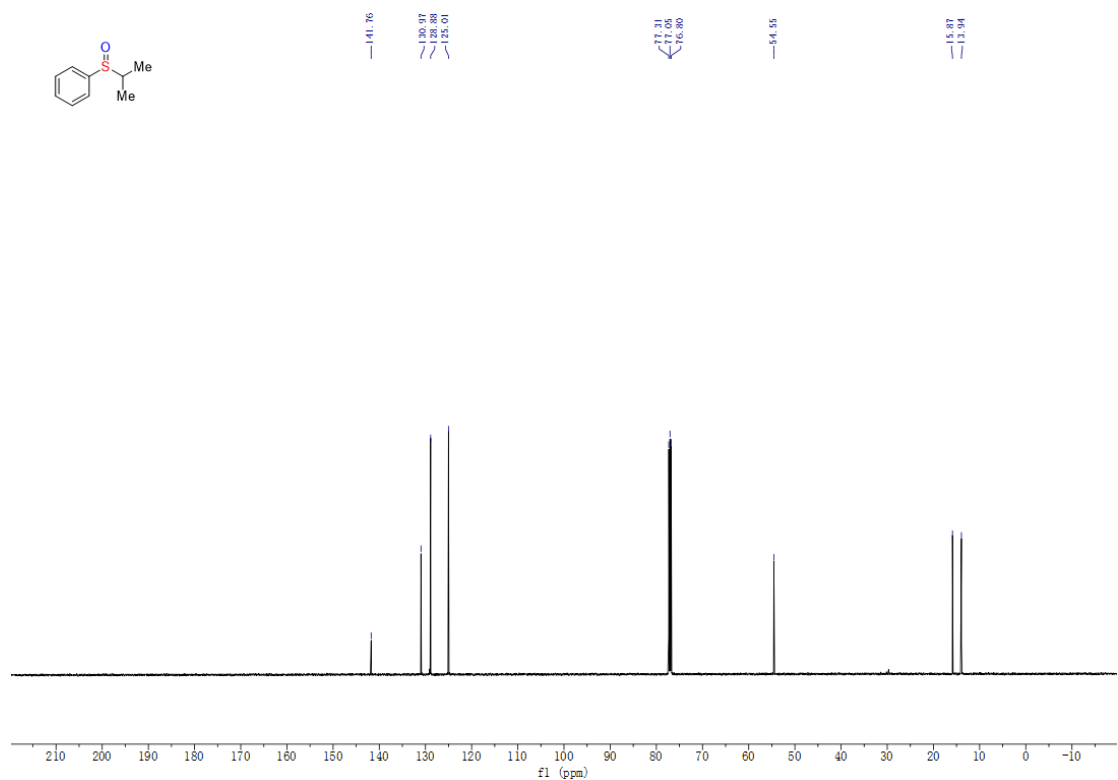

$^{13}\text{C NMR}$  of compound **2t**



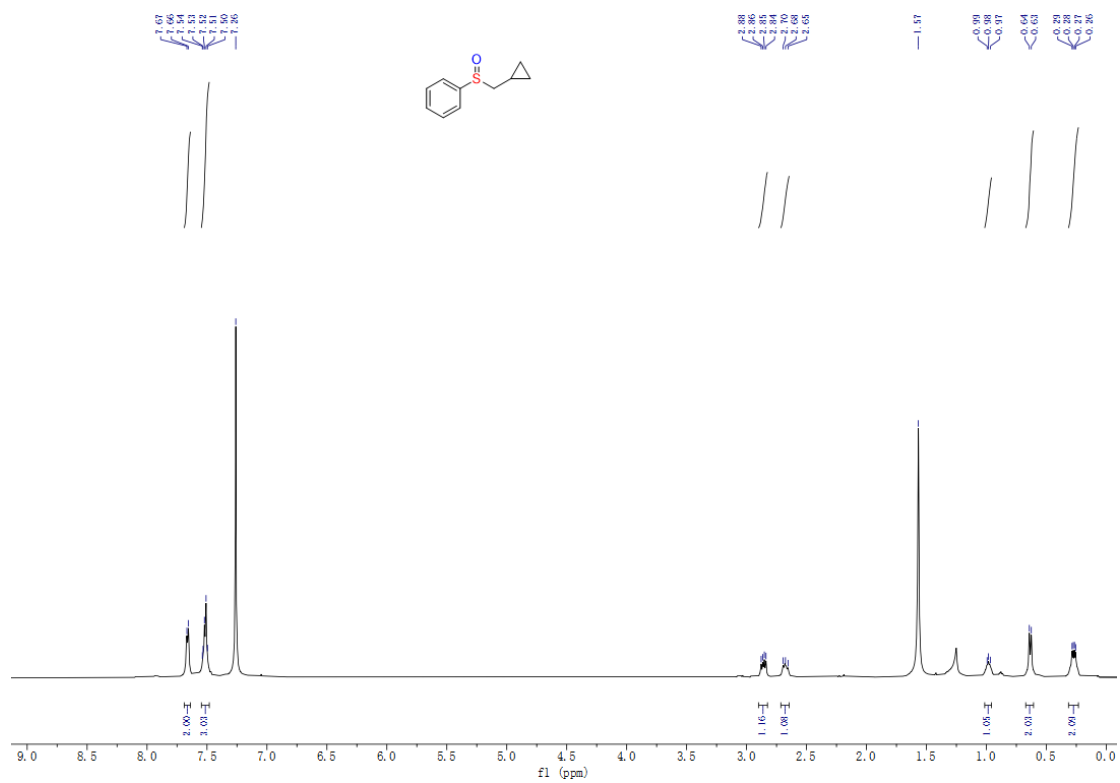

<sup>1</sup>H NMR of compound **2u**

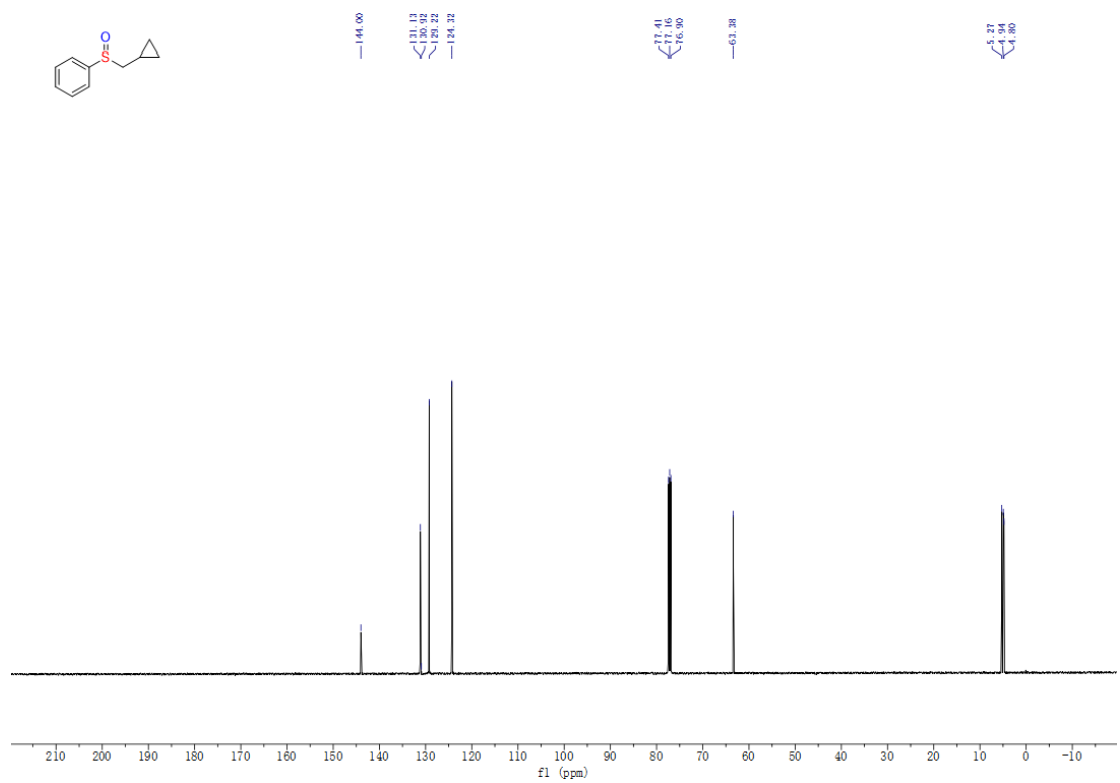

<sup>13</sup>C NMR of compound **2u**

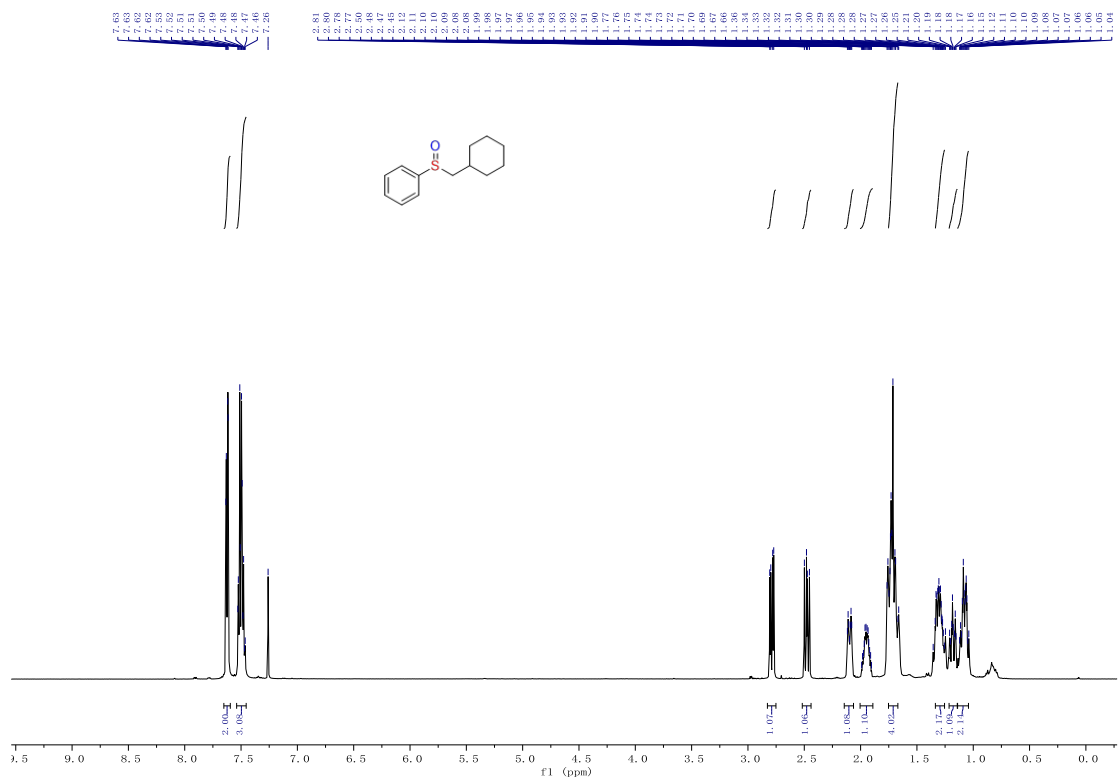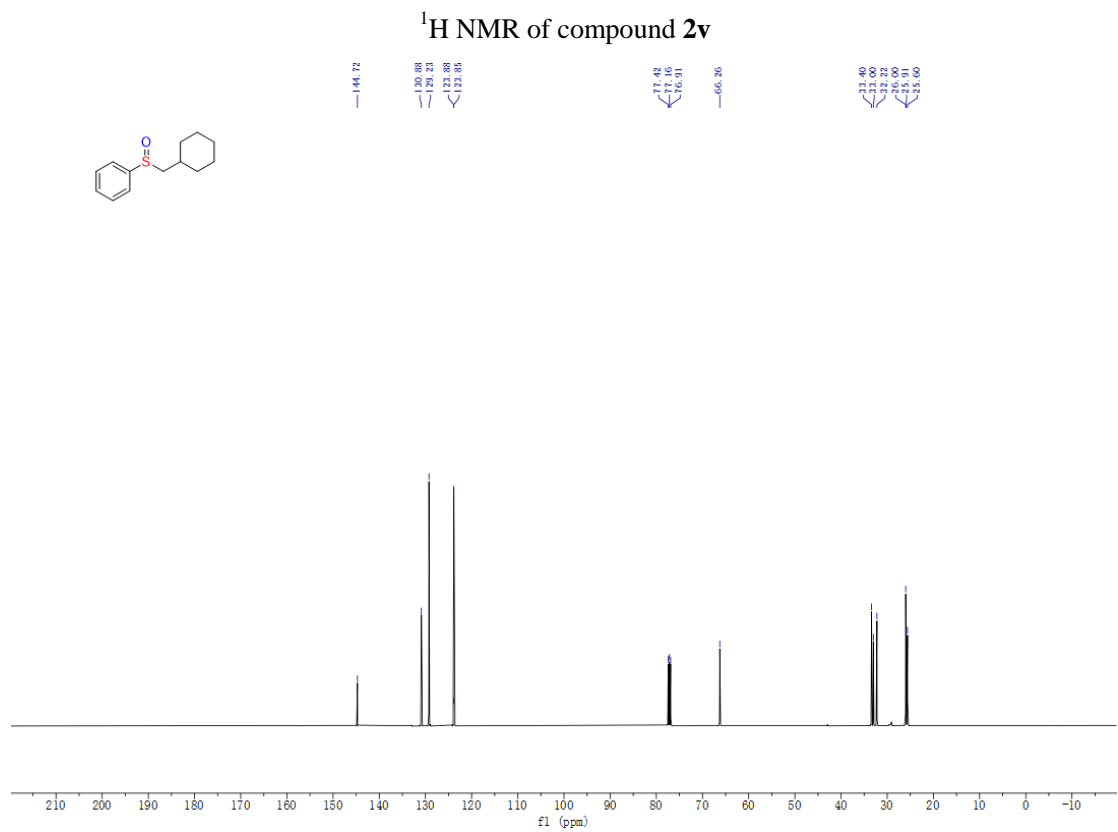

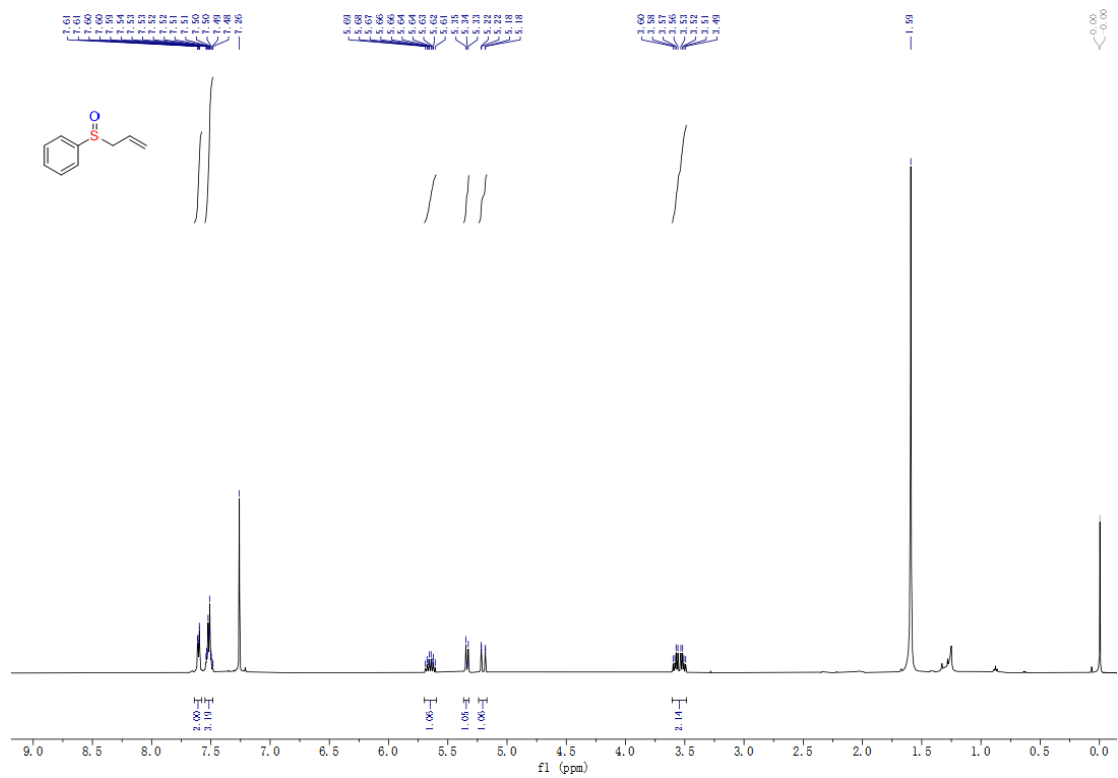

<sup>1</sup>H NMR of compound 2w

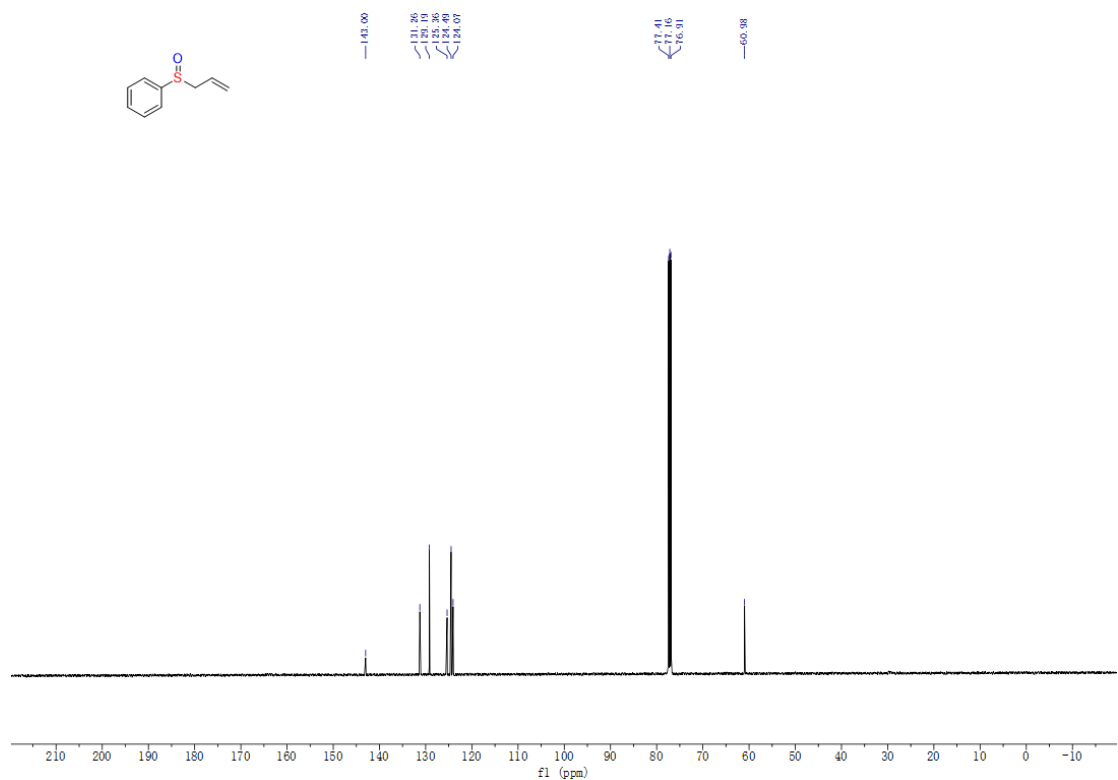

<sup>13</sup>C NMR of compound 2w

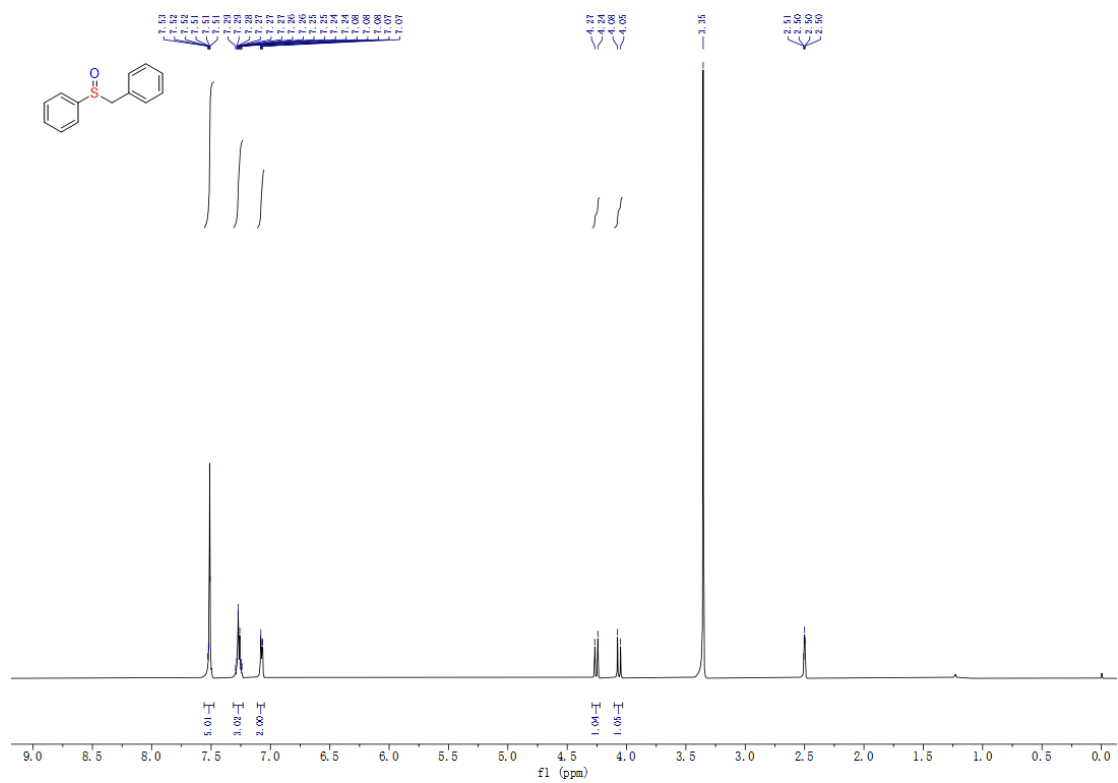

$^1\text{H NMR}$  of compound **2x**

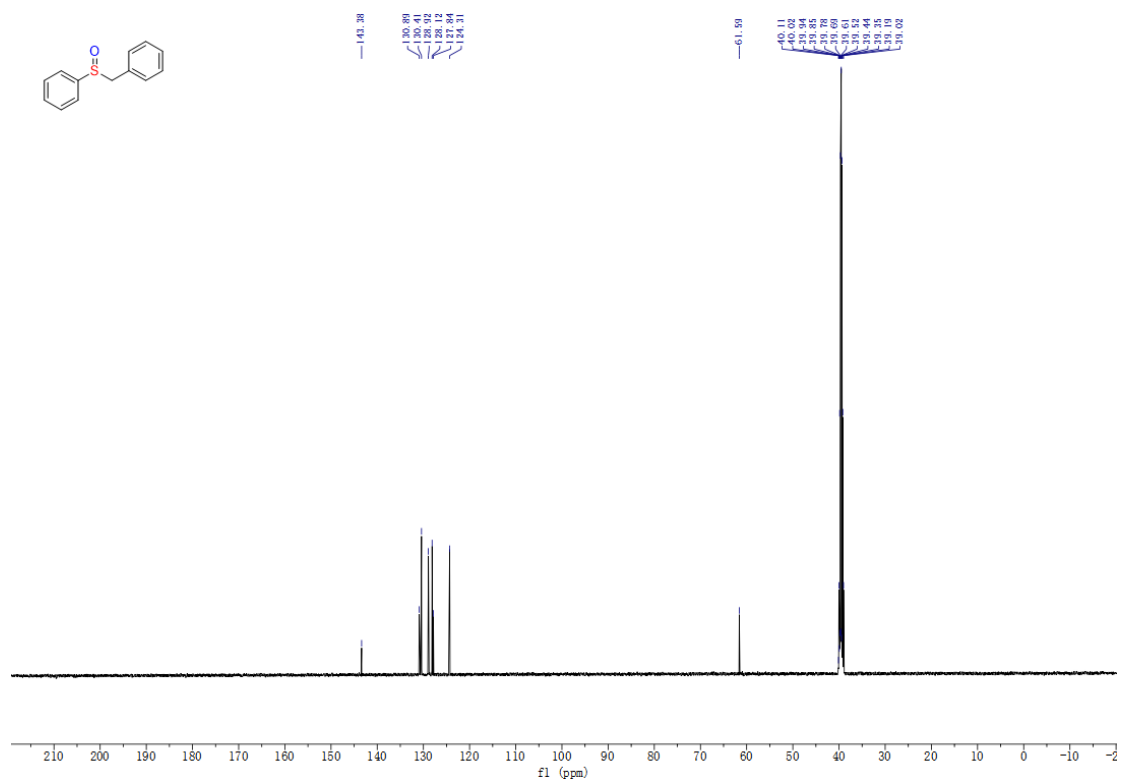

$^{13}\text{C NMR}$  of compound **2x**

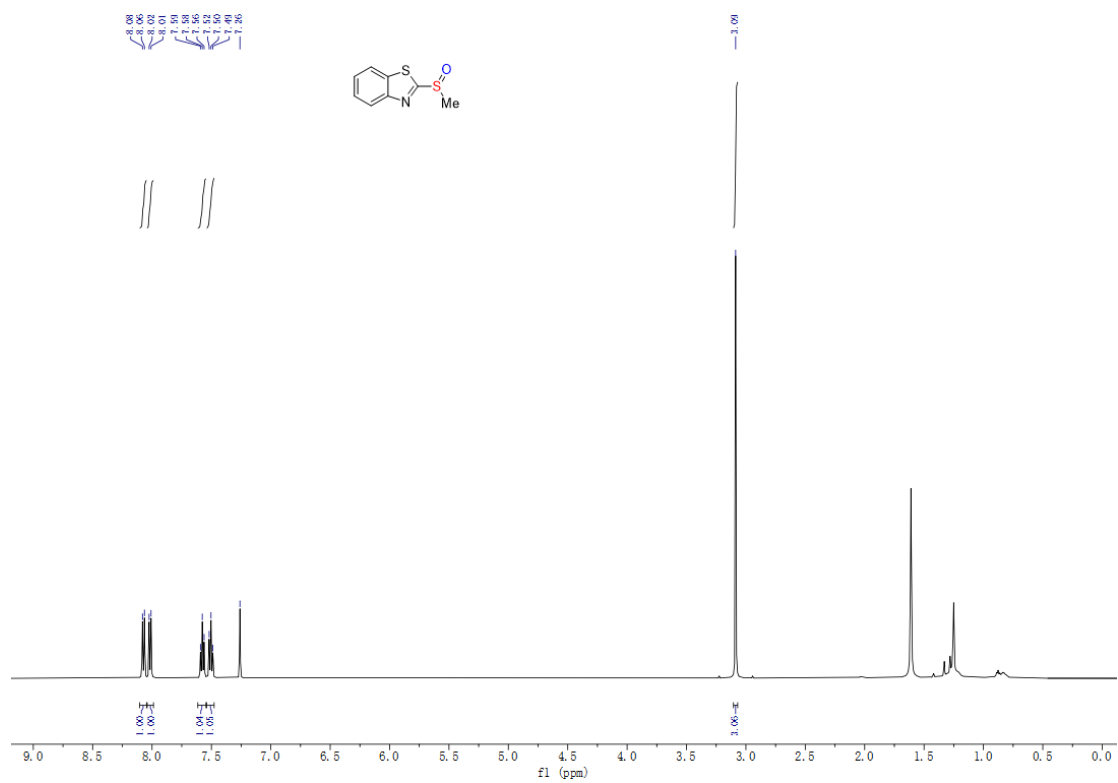

<sup>1</sup>H NMR of compound 2y

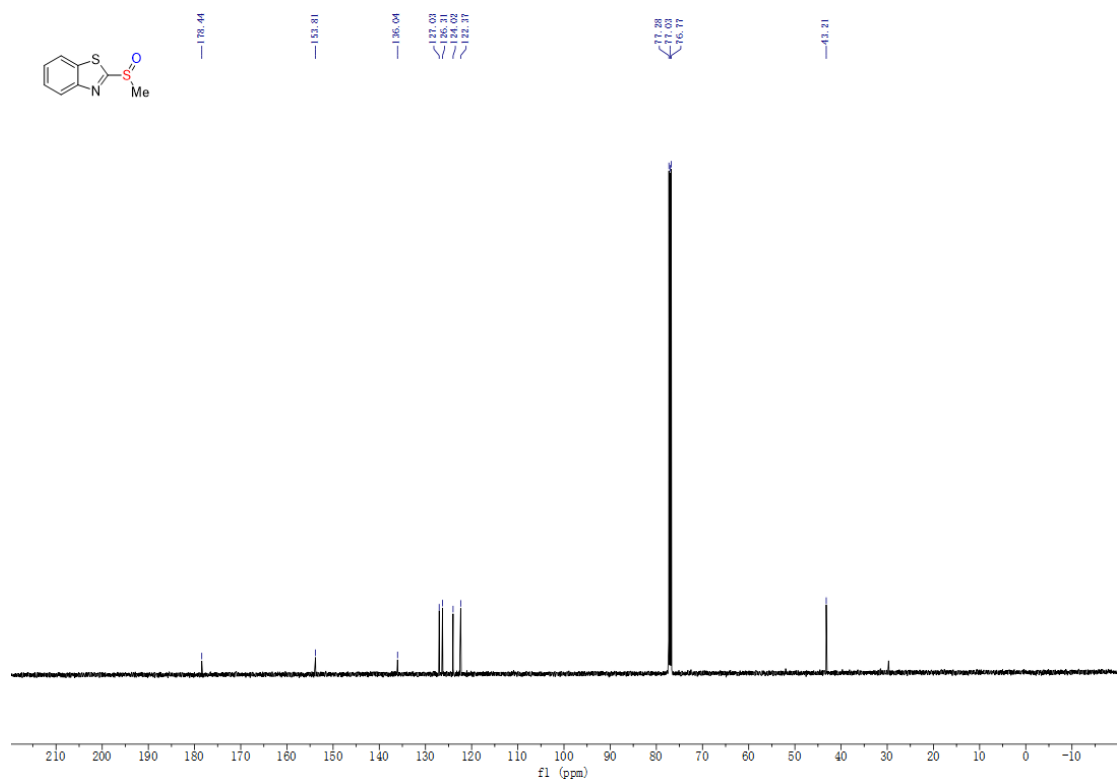

<sup>13</sup>C NMR of compound 2y

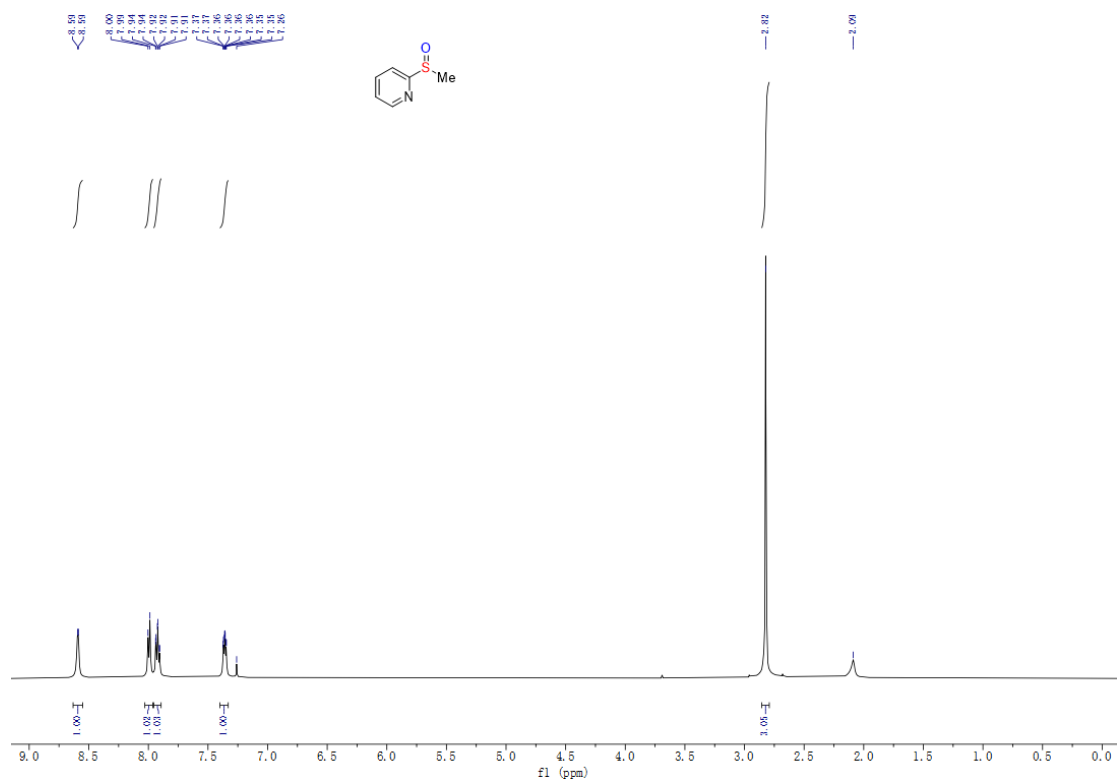

<sup>1</sup>H NMR of compound **2z**

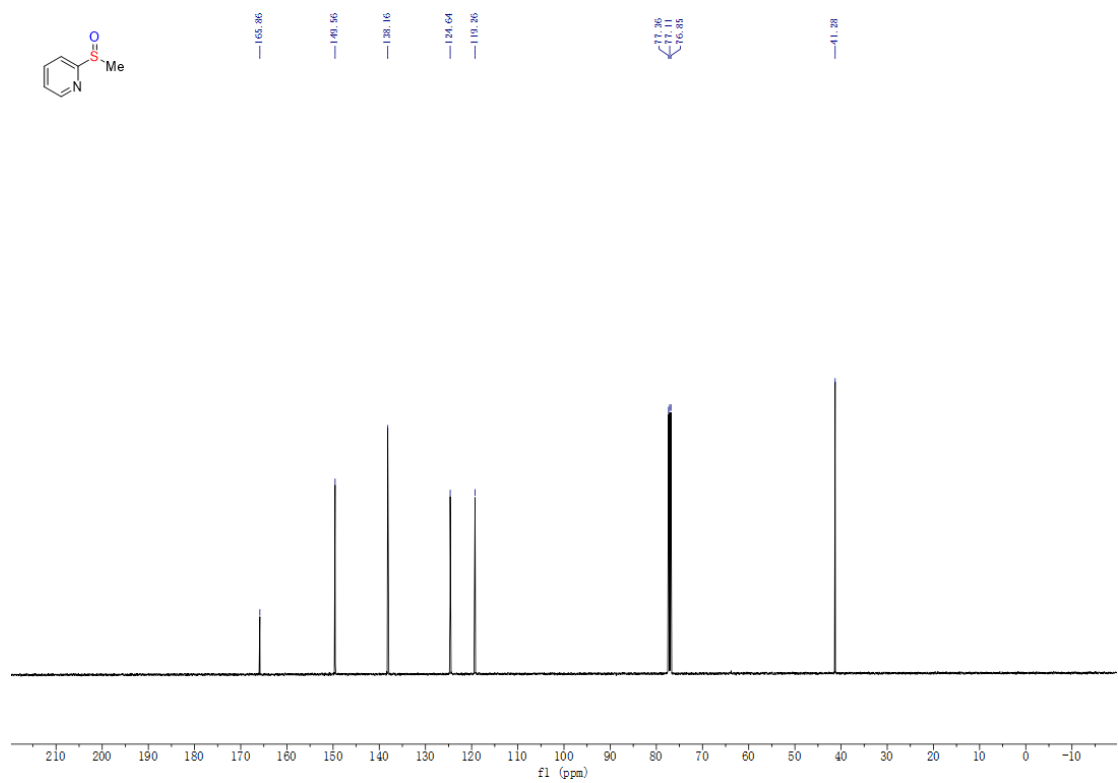

<sup>13</sup>C NMR of compound **2z**

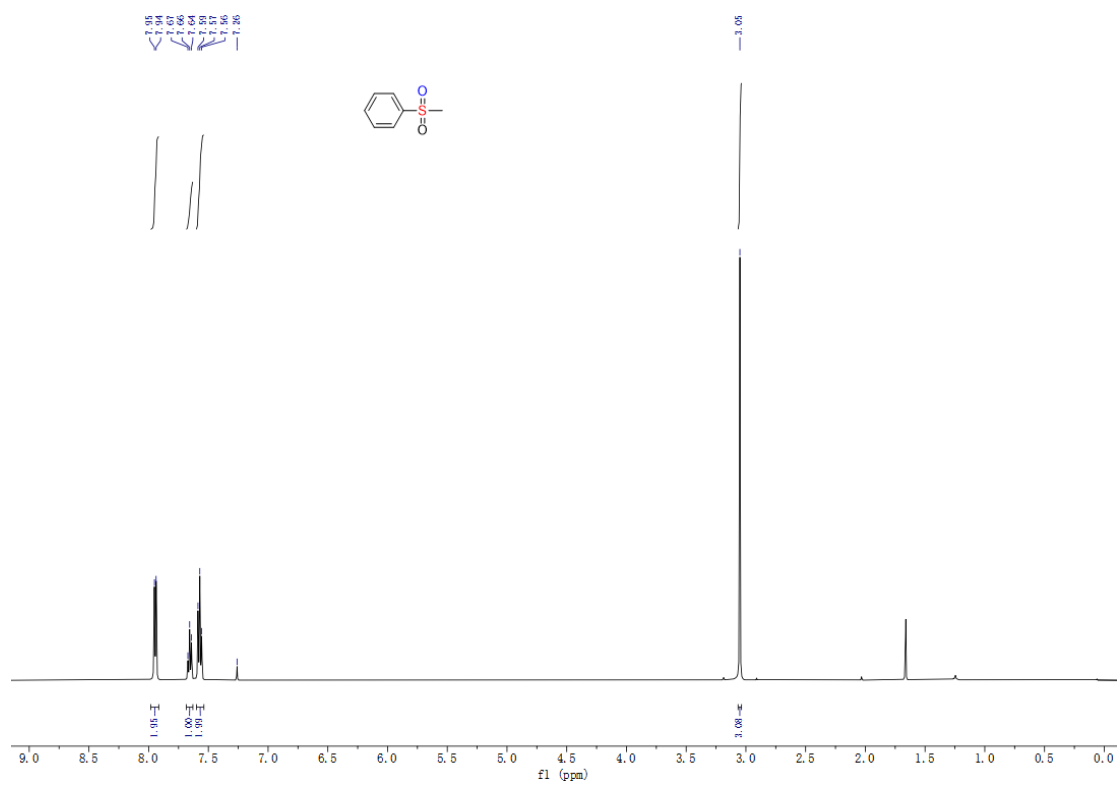

<sup>1</sup>H NMR of compound **3a**

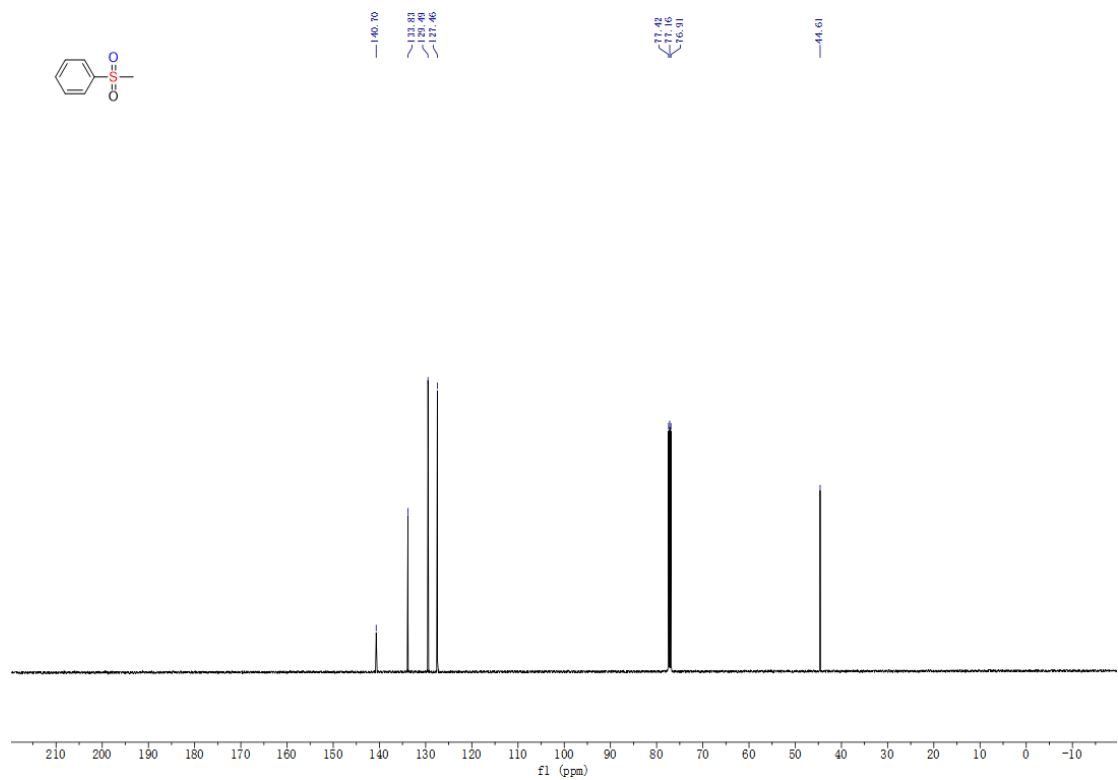

<sup>13</sup>C NMR of compound **3a**

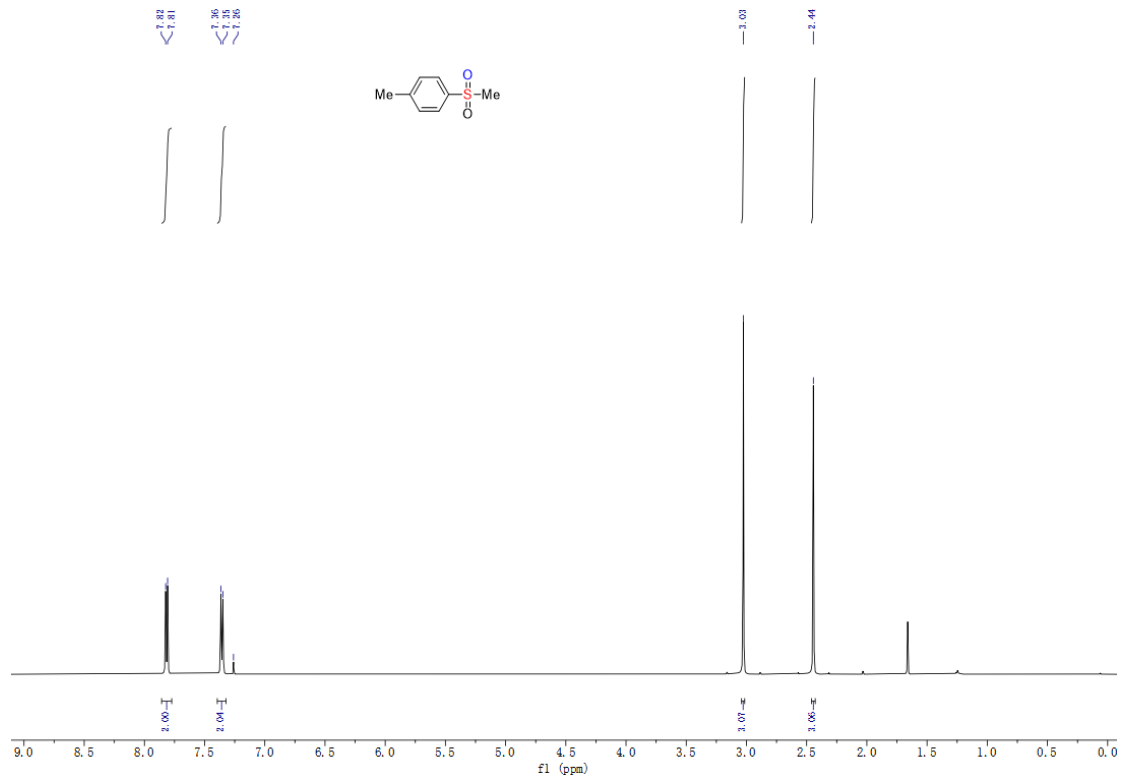

<sup>1</sup>H NMR of compound **3b**

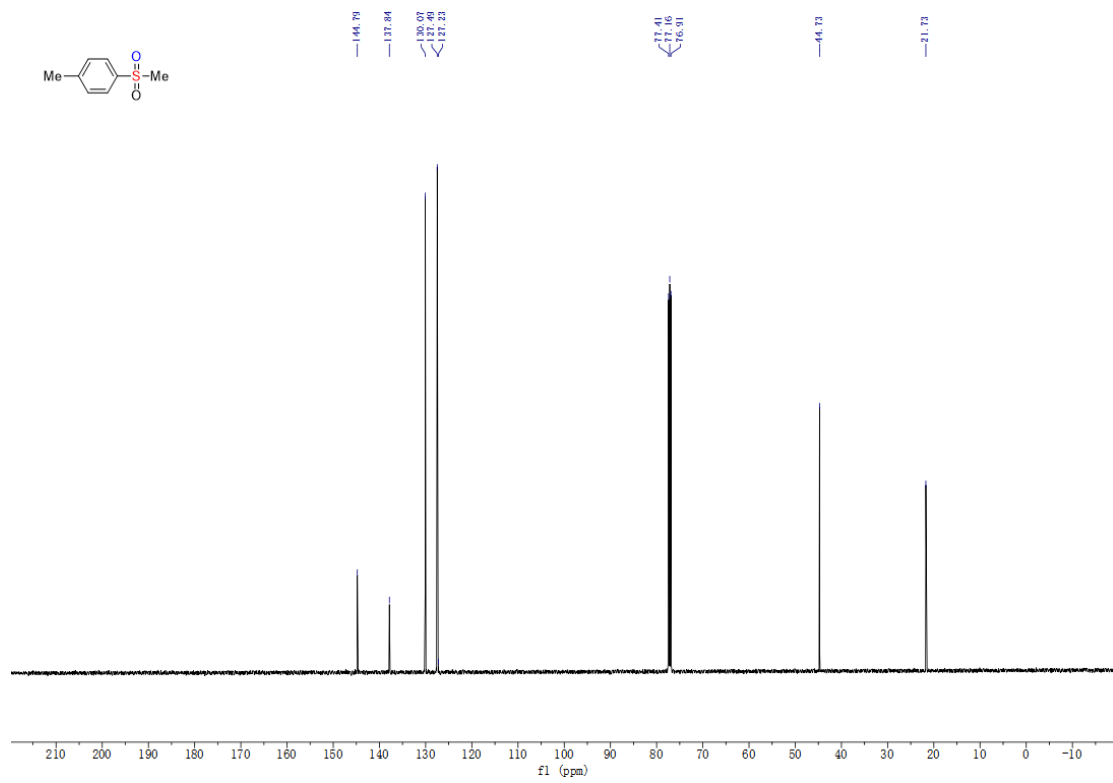

<sup>13</sup>C NMR of compound **3b**



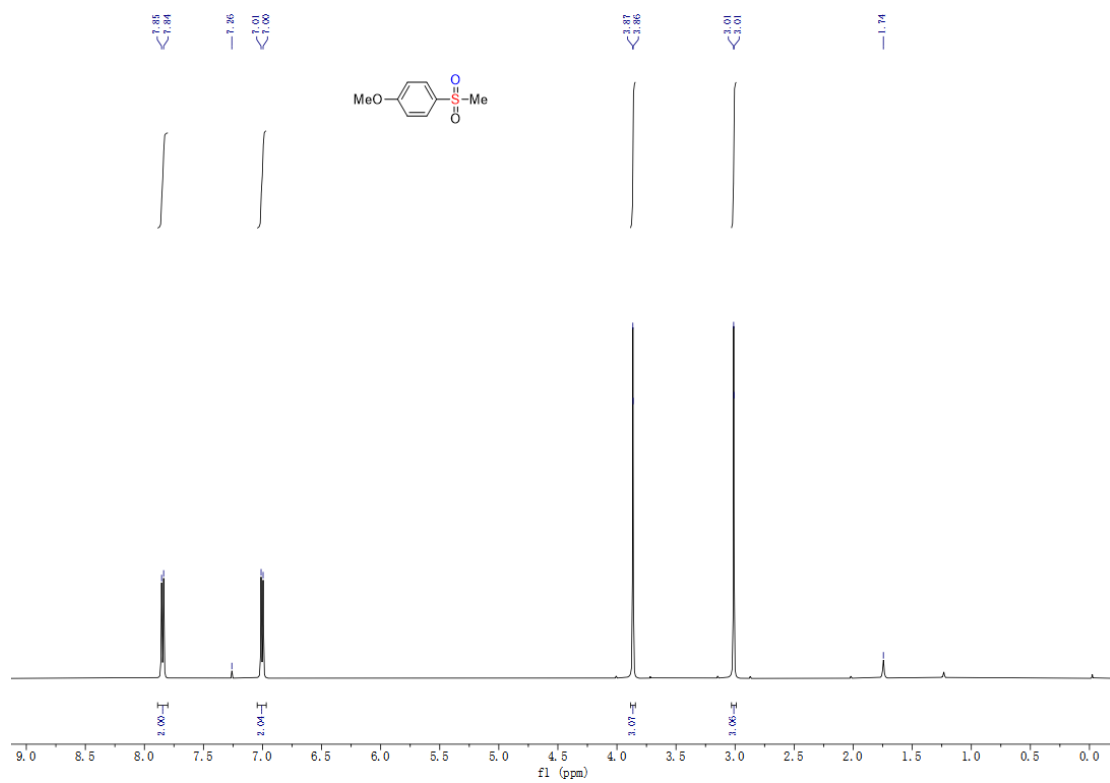

<sup>1</sup>H NMR of compound **3c**

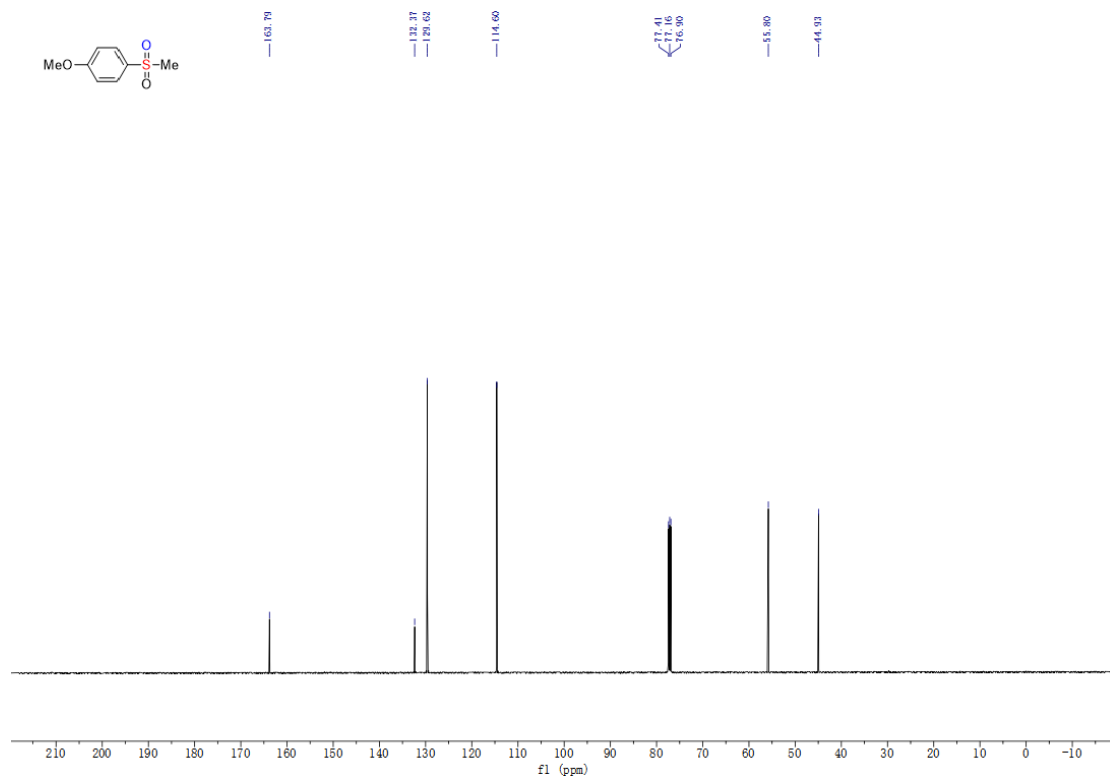

<sup>13</sup>C NMR of compound **3c**

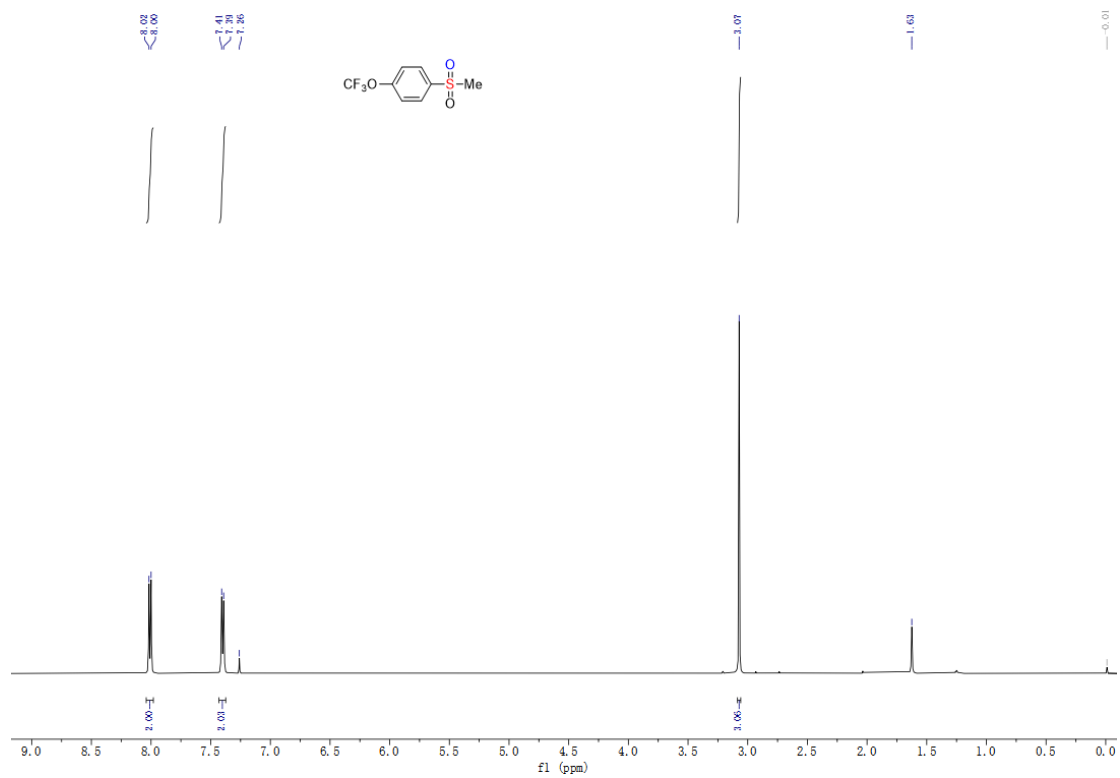

<sup>1</sup>H NMR of compound **3d**

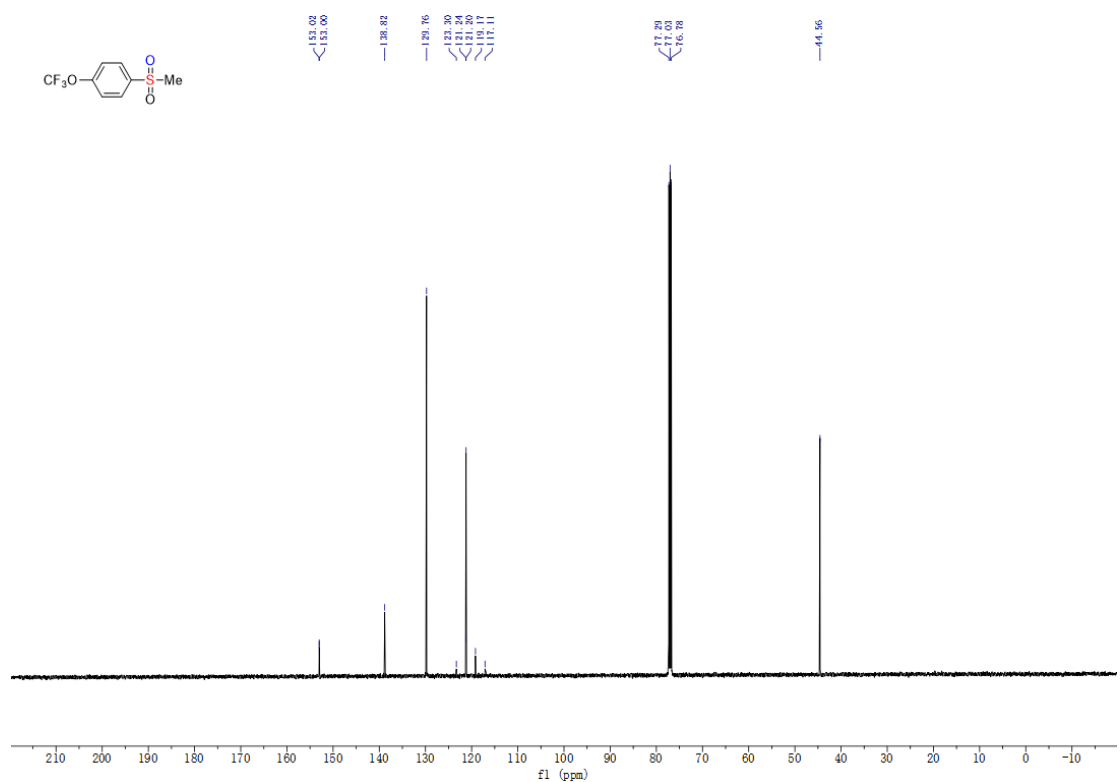

<sup>13</sup>C NMR of compound **3d**

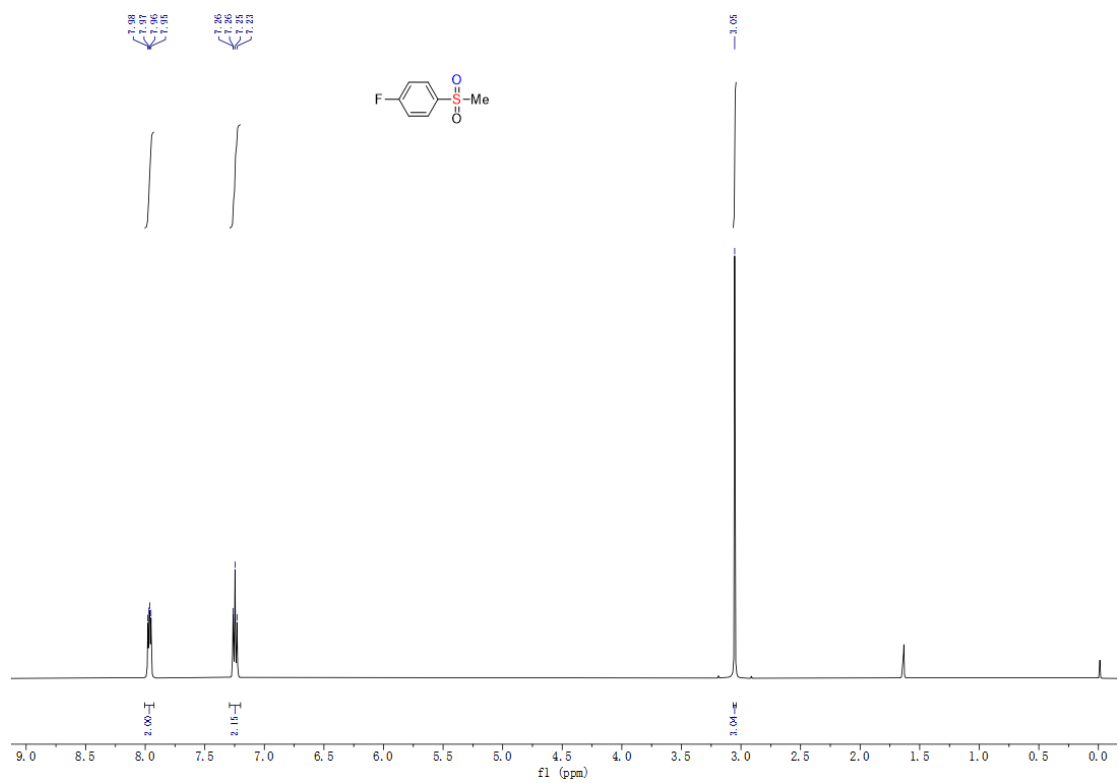

<sup>1</sup>H NMR of compound **3e**

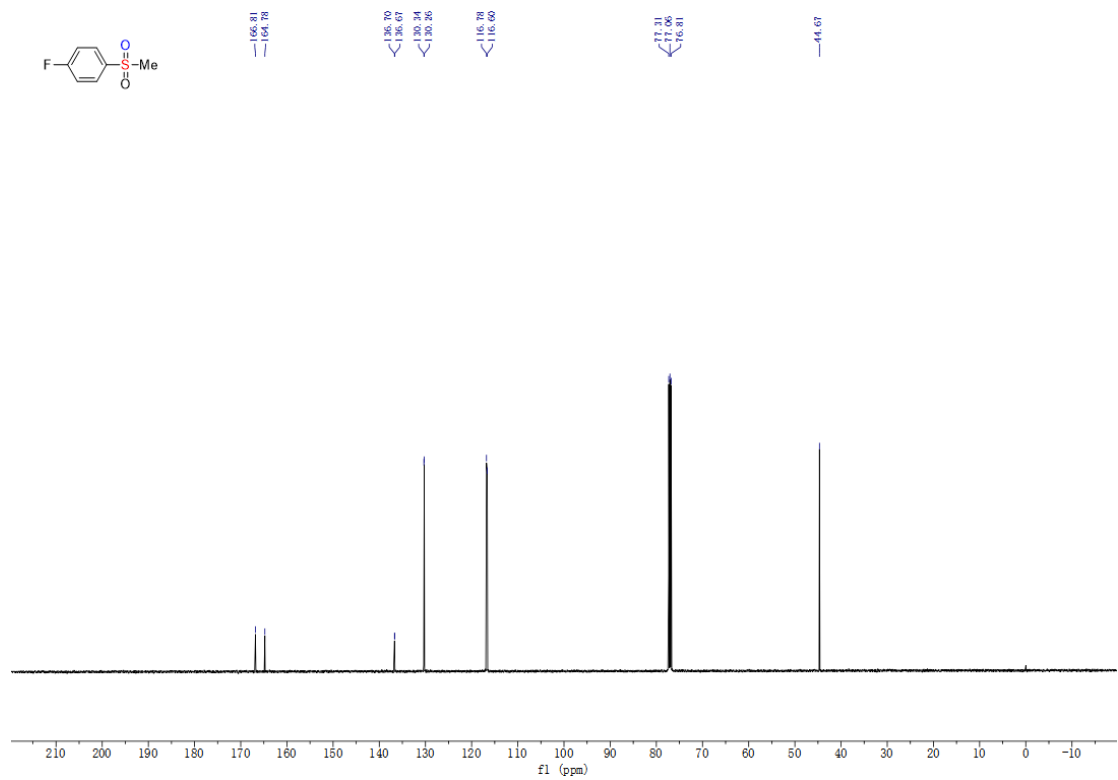

<sup>13</sup>C NMR of compound **3e**

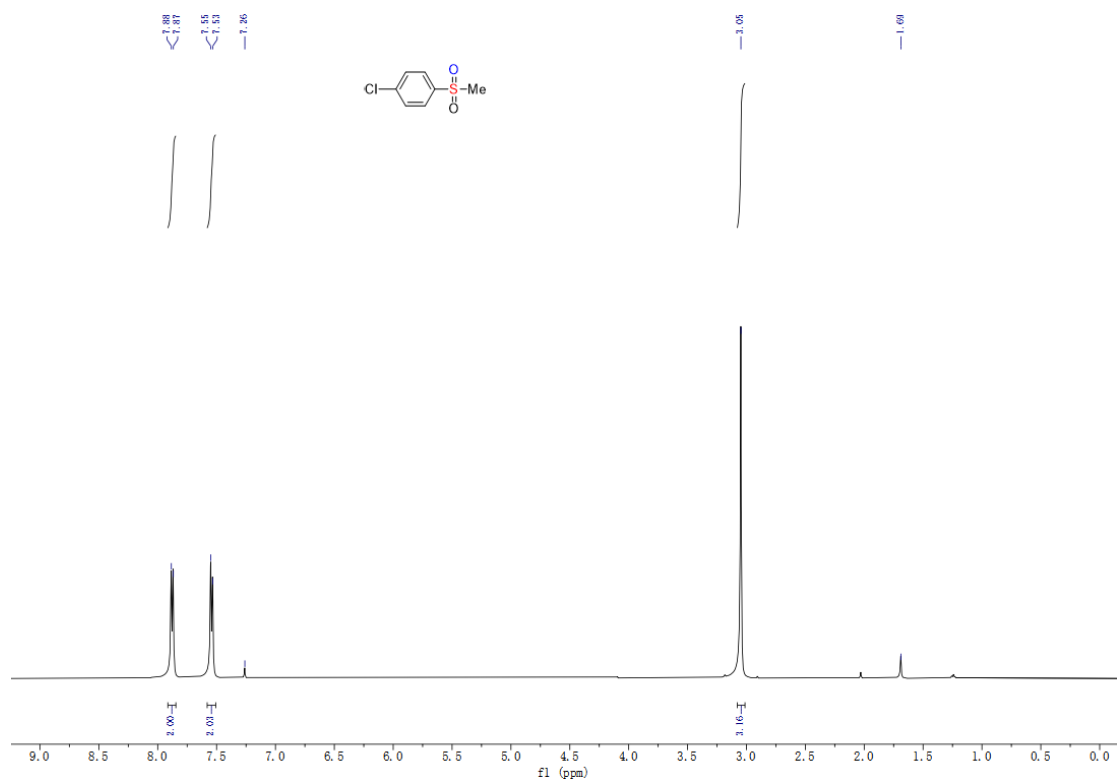

$^1\text{H}$  NMR of compound **3f**

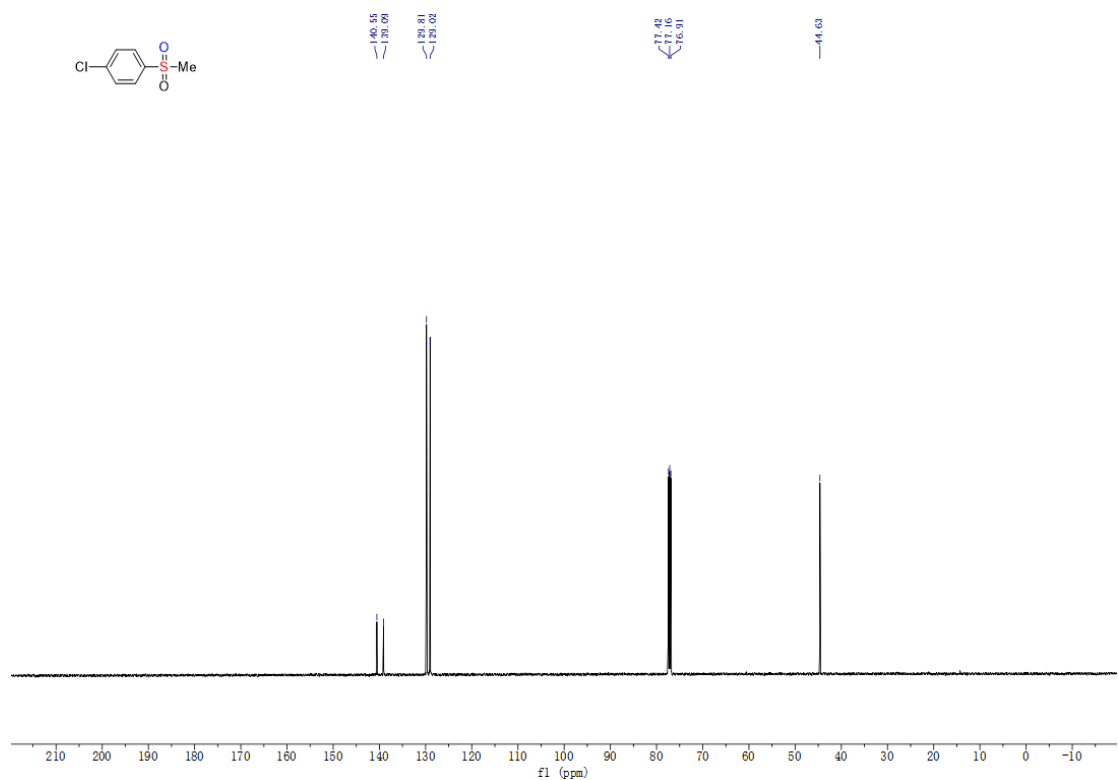

$^{13}\text{C}$  NMR of compound **3f**

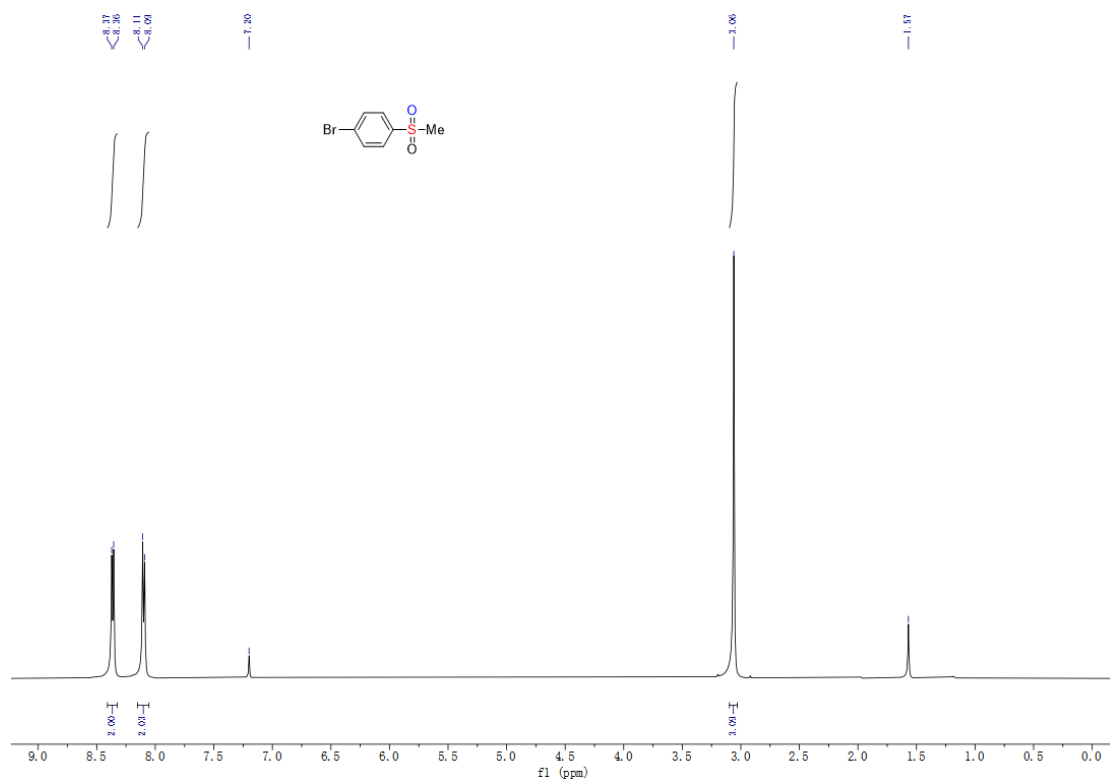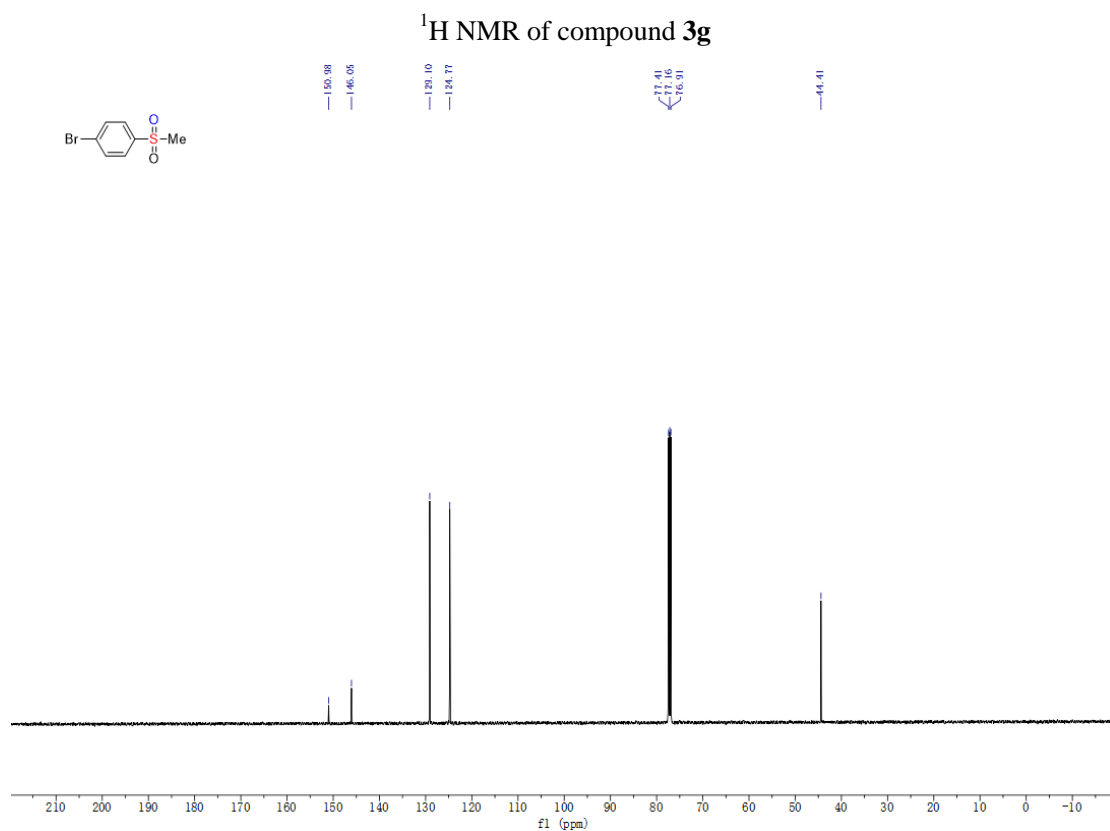

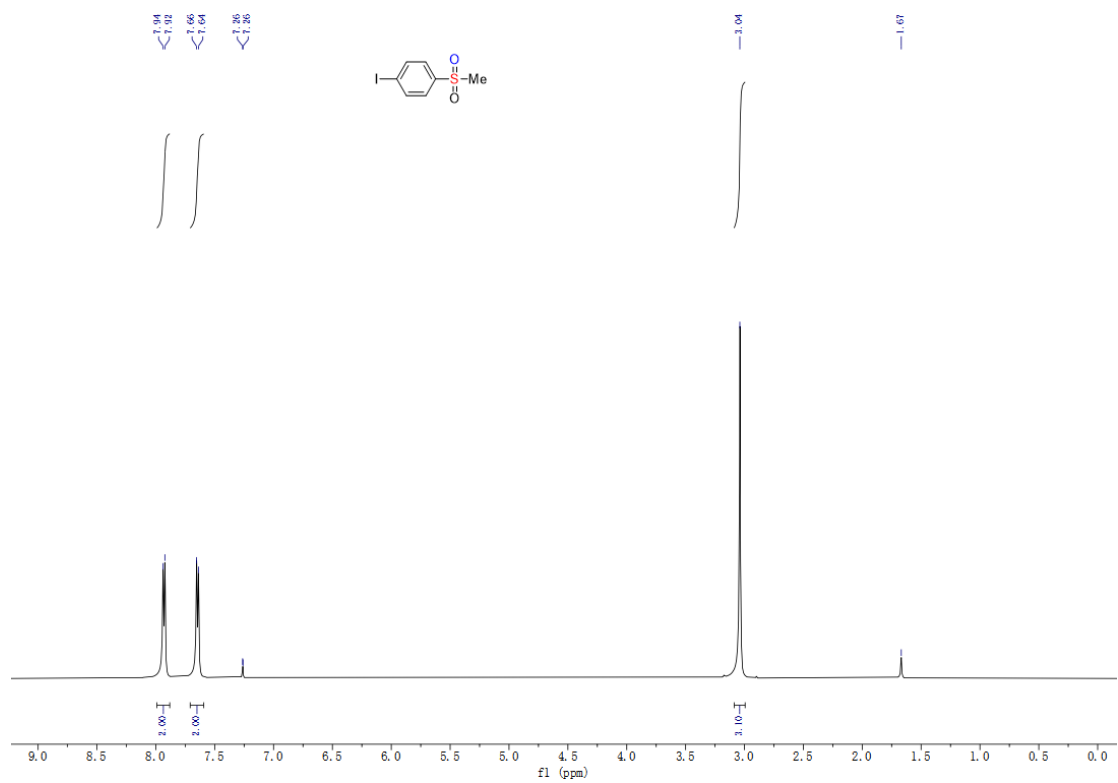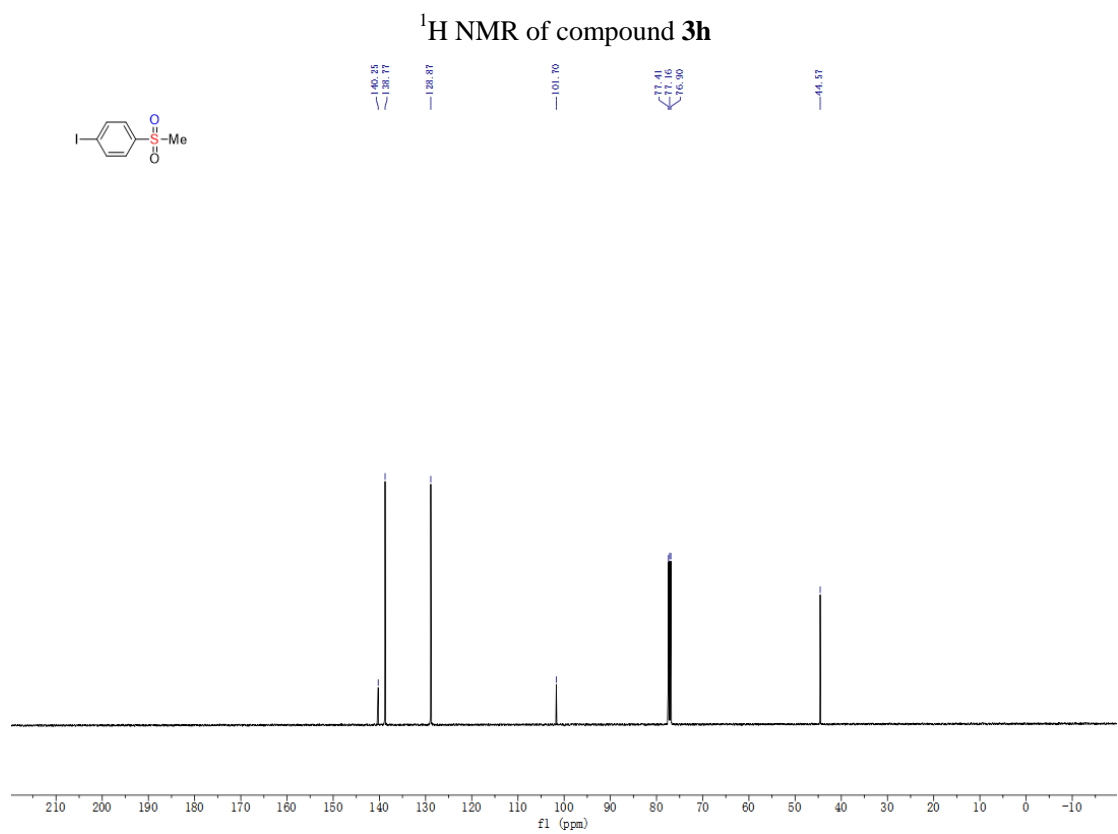

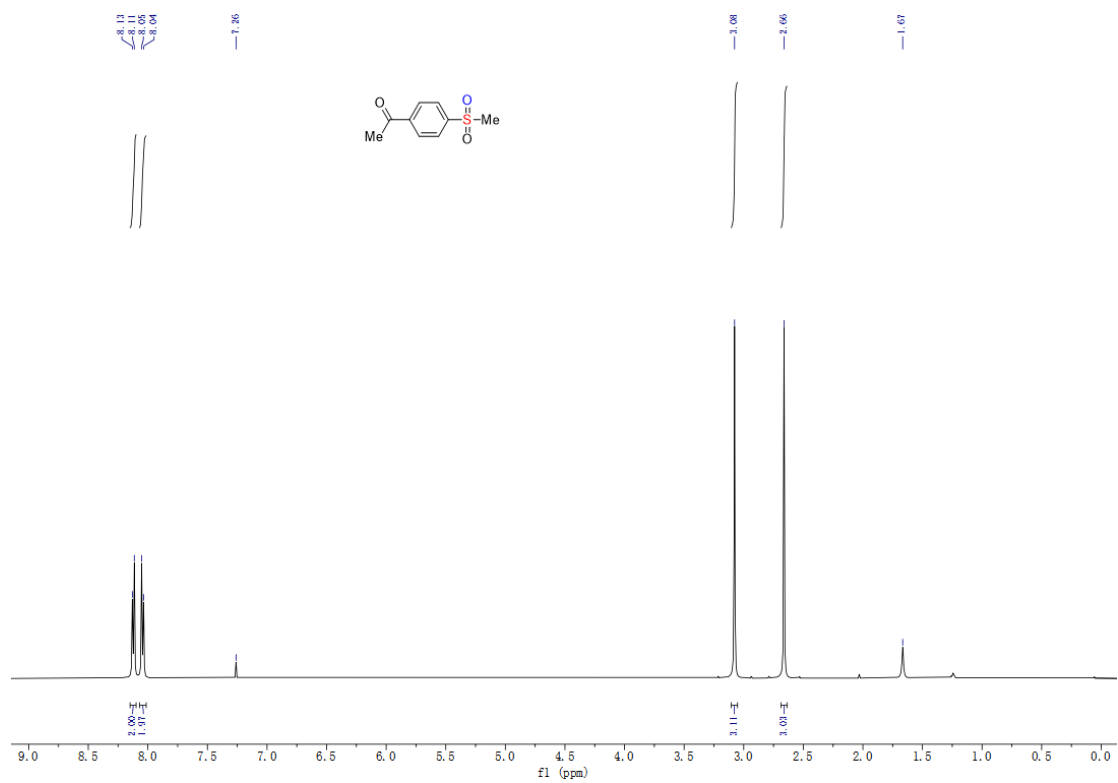

$^1\text{H NMR}$  of compound 3j

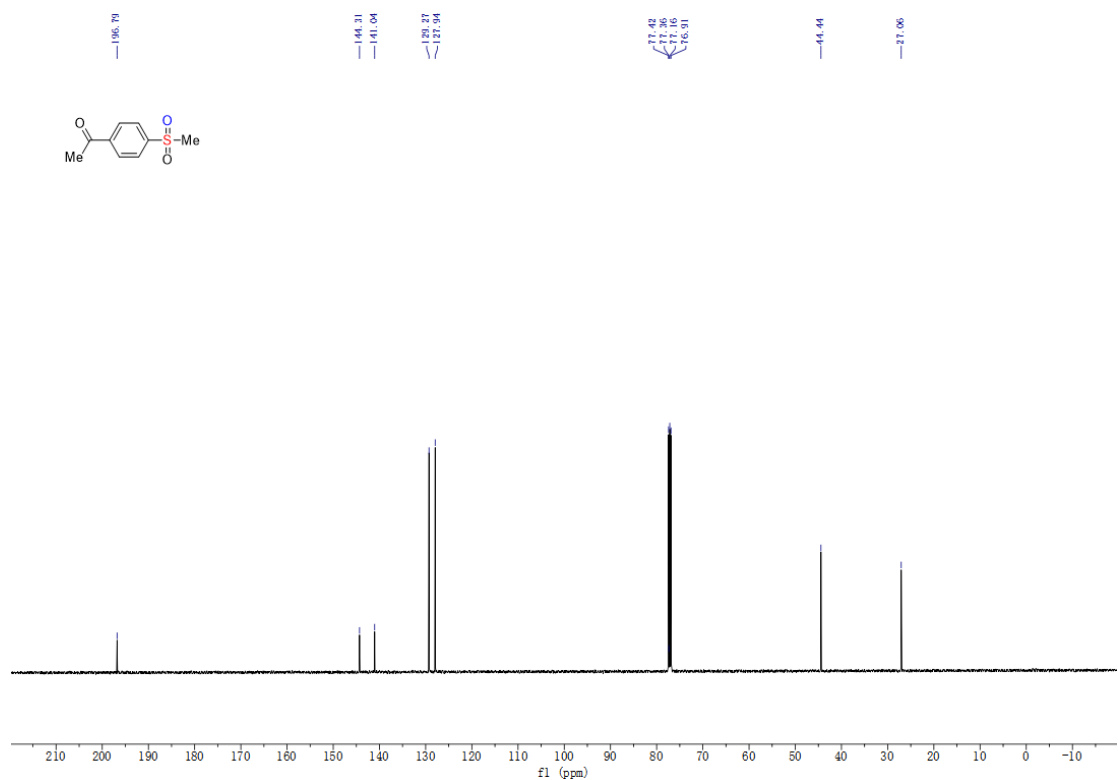

$^{13}\text{C NMR}$  of compound 3j

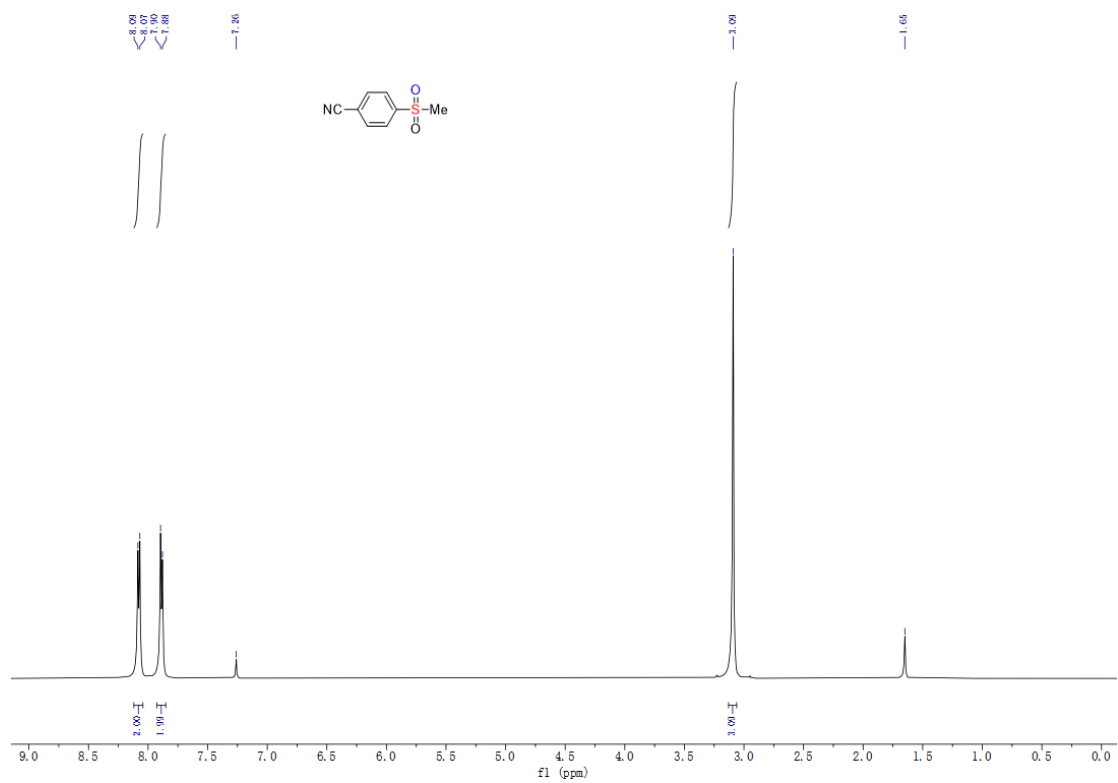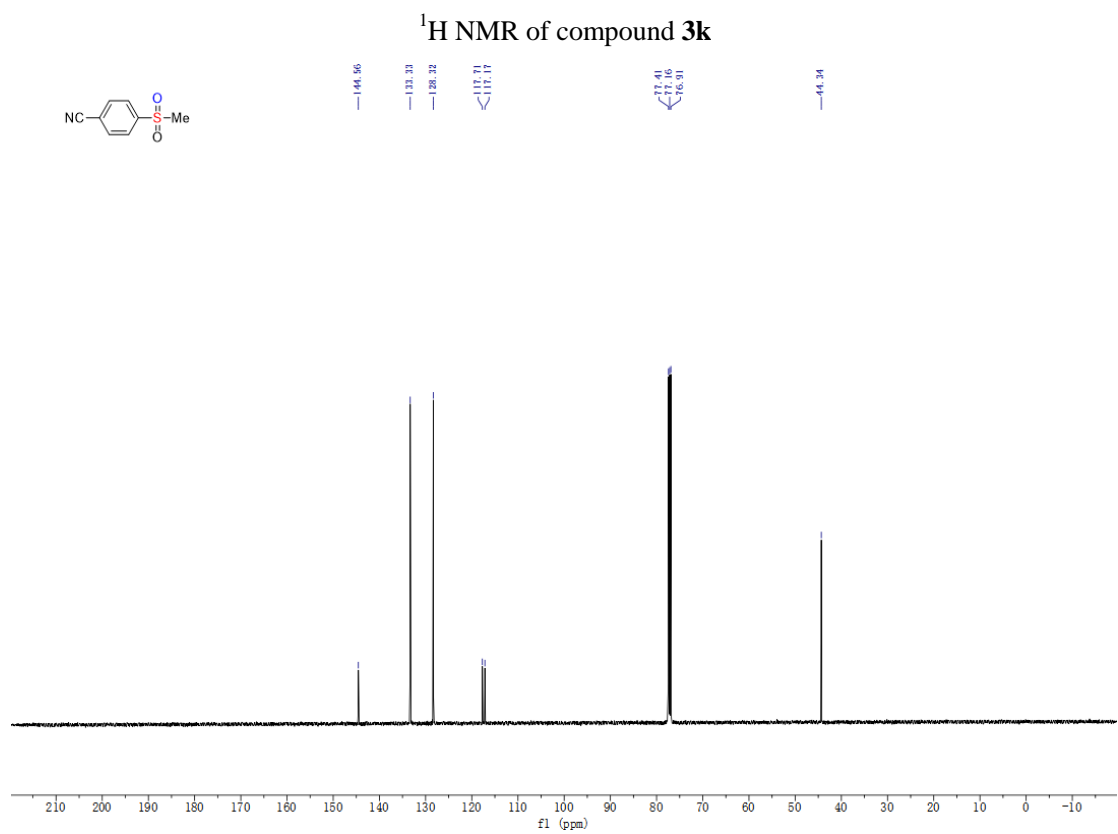



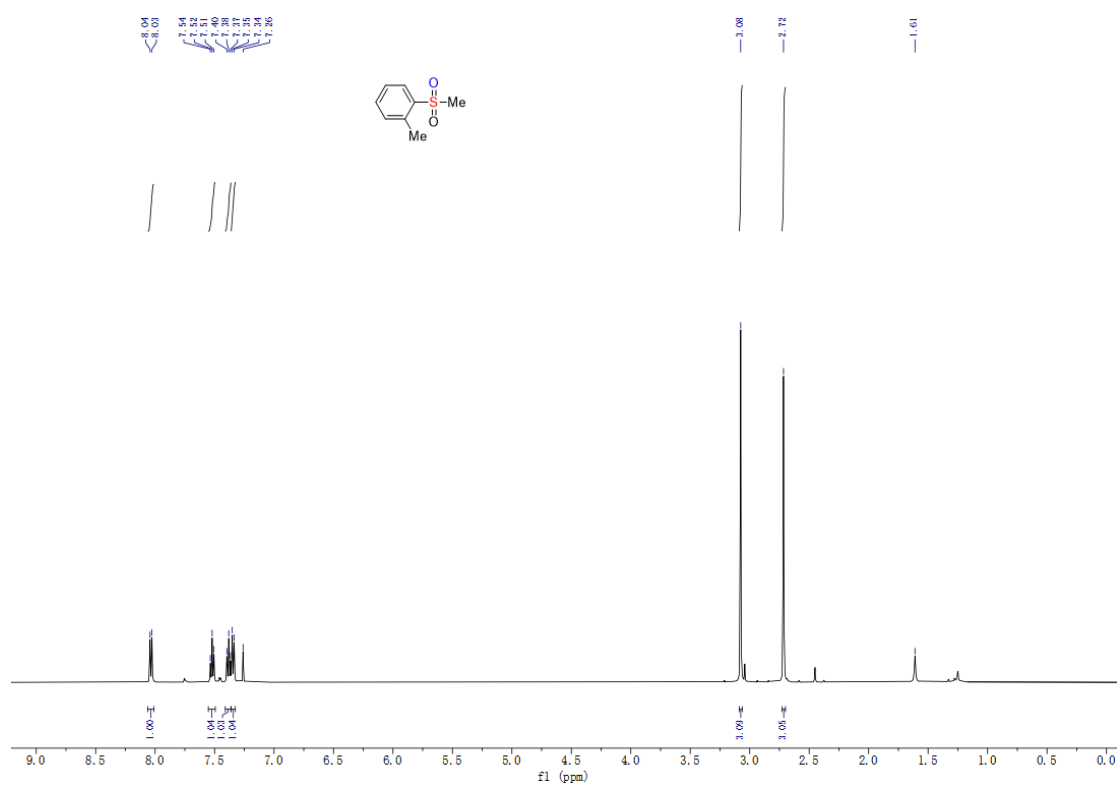

<sup>1</sup>H NMR of compound 3m

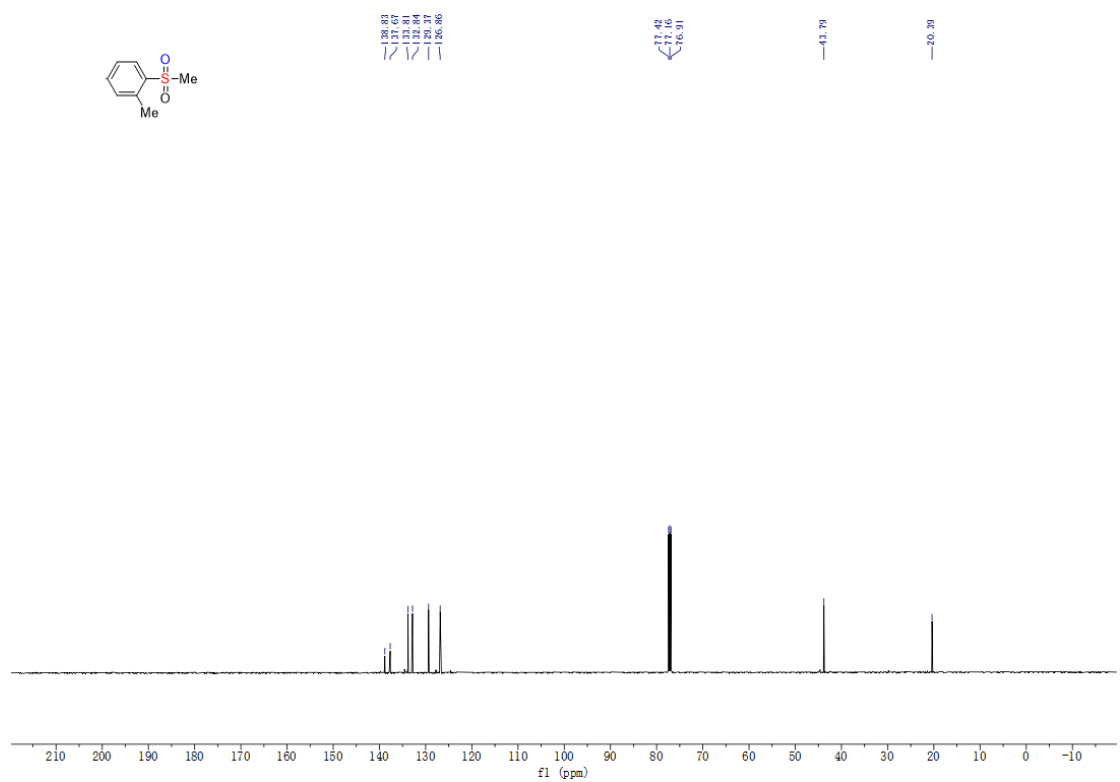

<sup>13</sup>C NMR of compound 3m

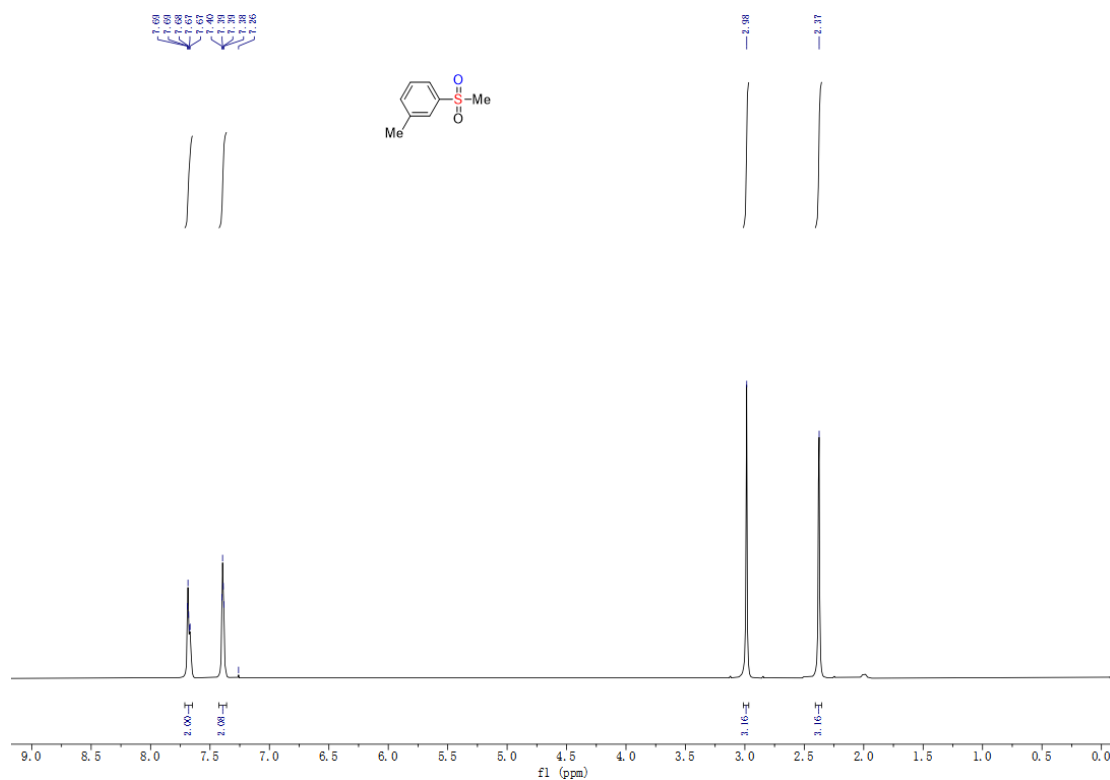

$^1\text{H NMR}$  of compound **3n**

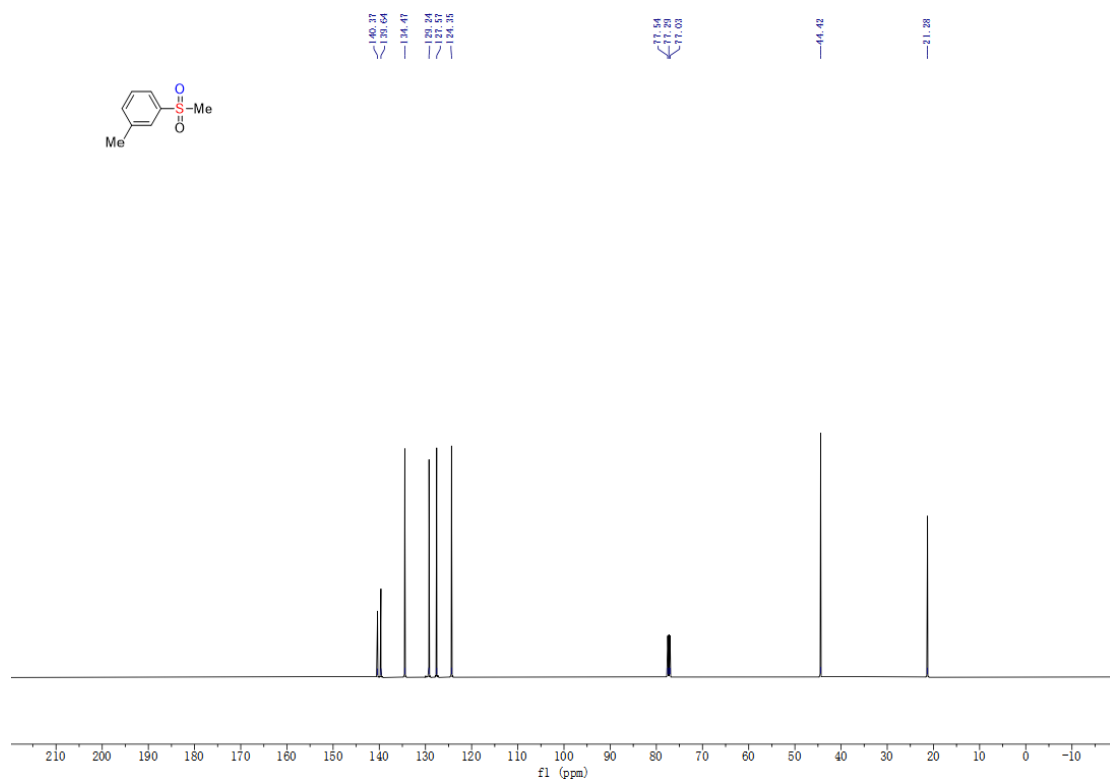

$^{13}\text{C NMR}$  of compound **3n**

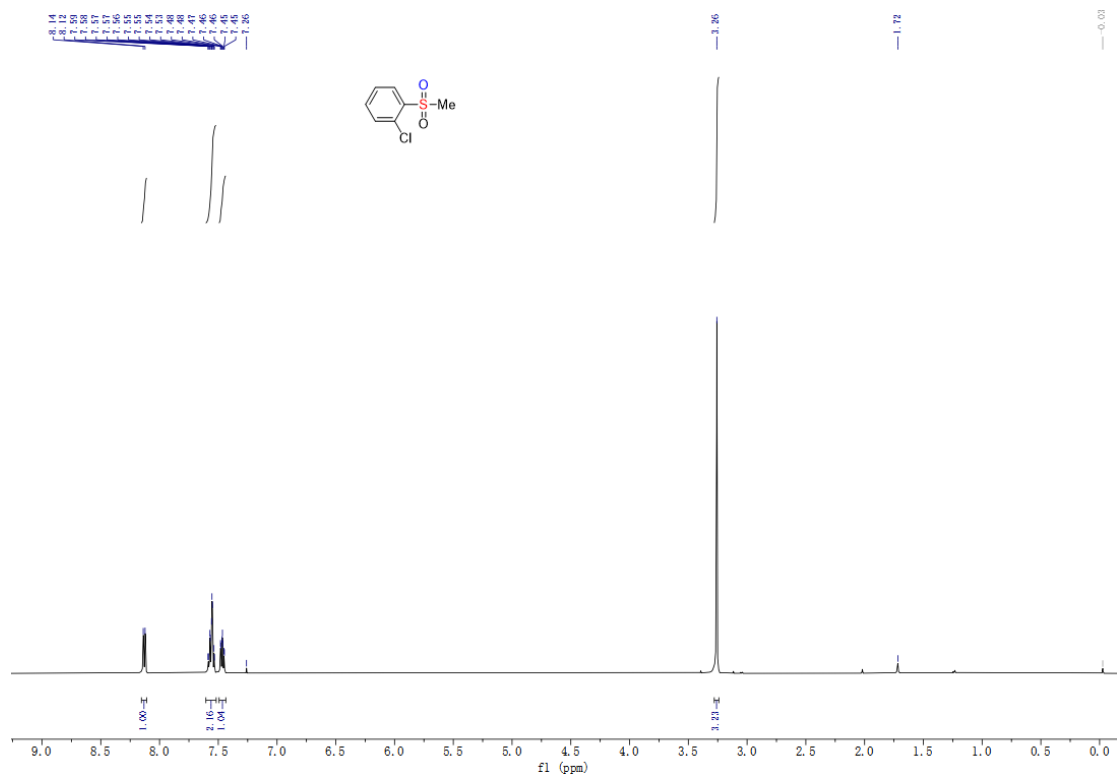

<sup>1</sup>H NMR of compound **3o**

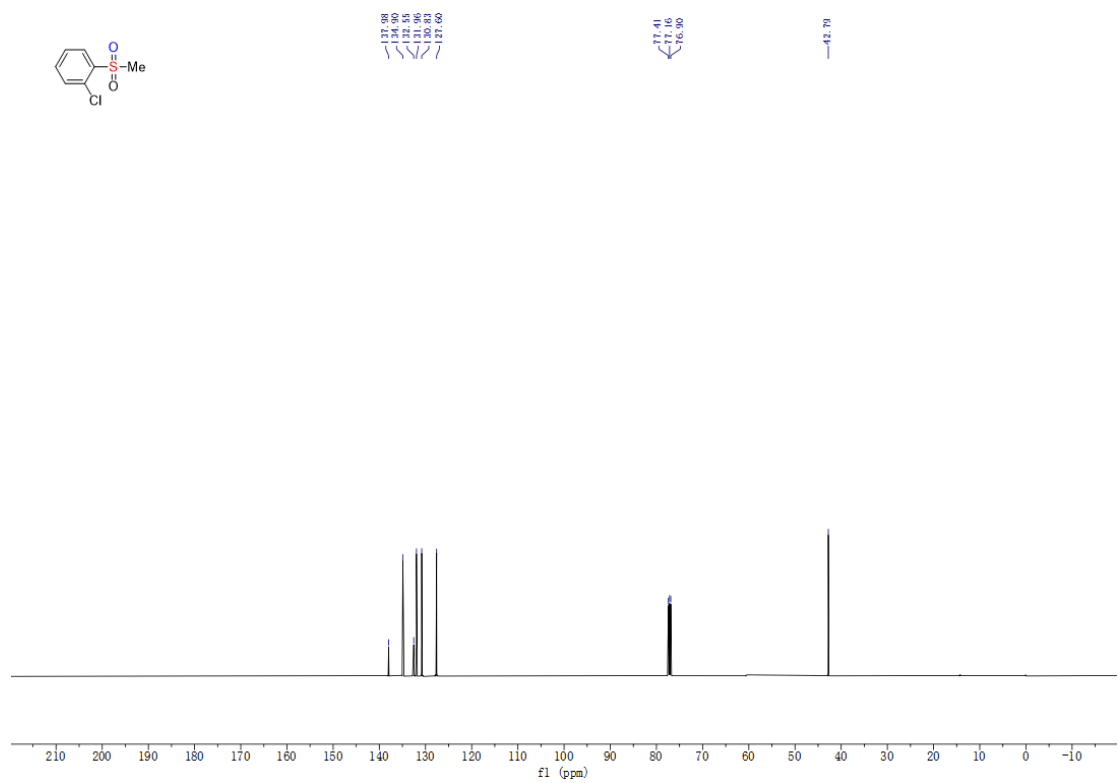

<sup>13</sup>C NMR of compound **3o**

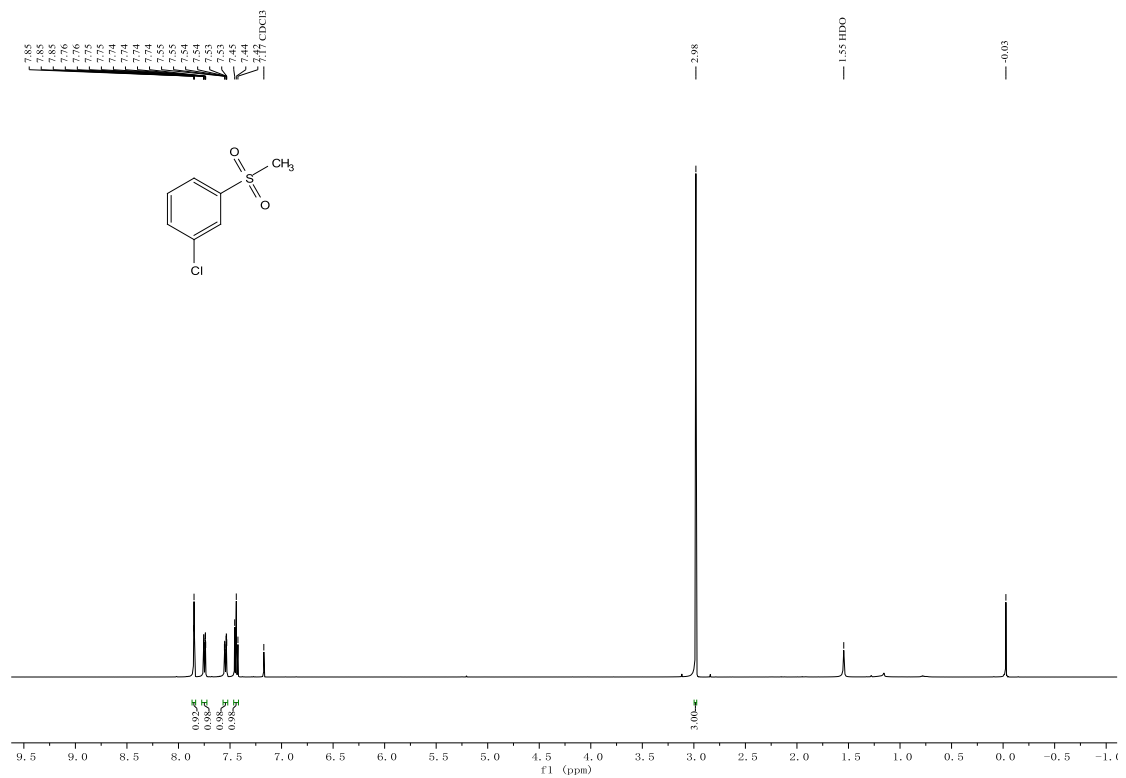

$^1\text{H NMR}$  of compound **3p**

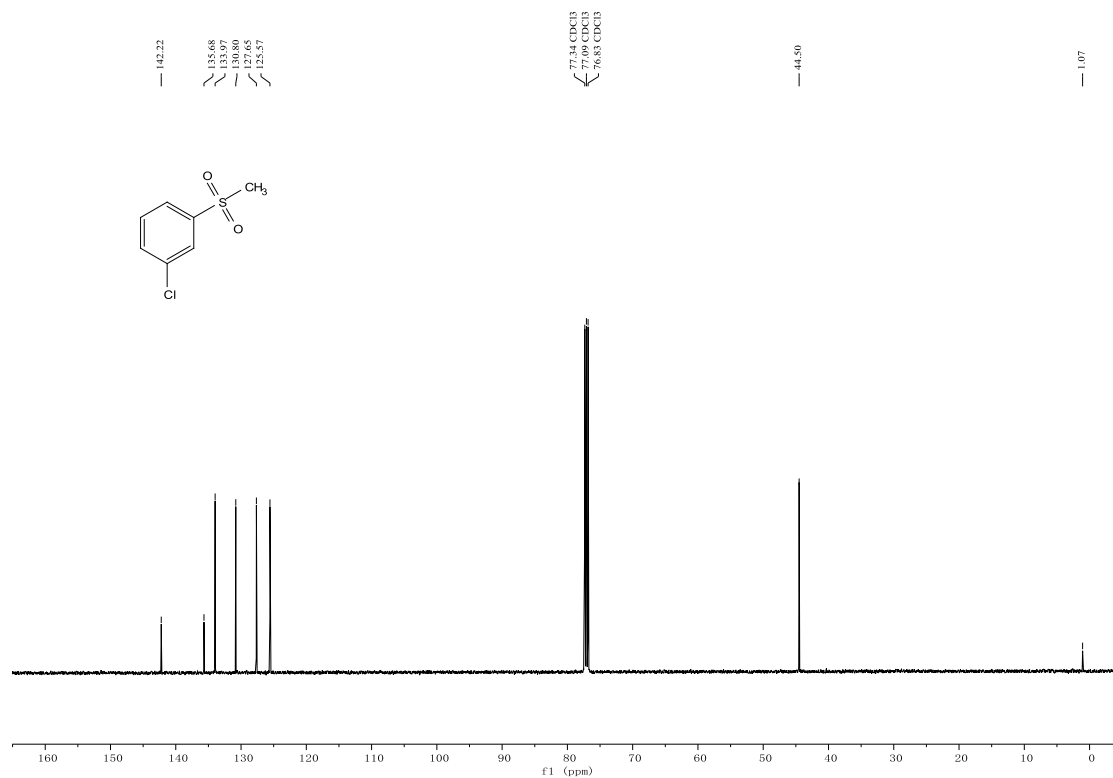

$^{13}\text{C NMR}$  of compound **3p**

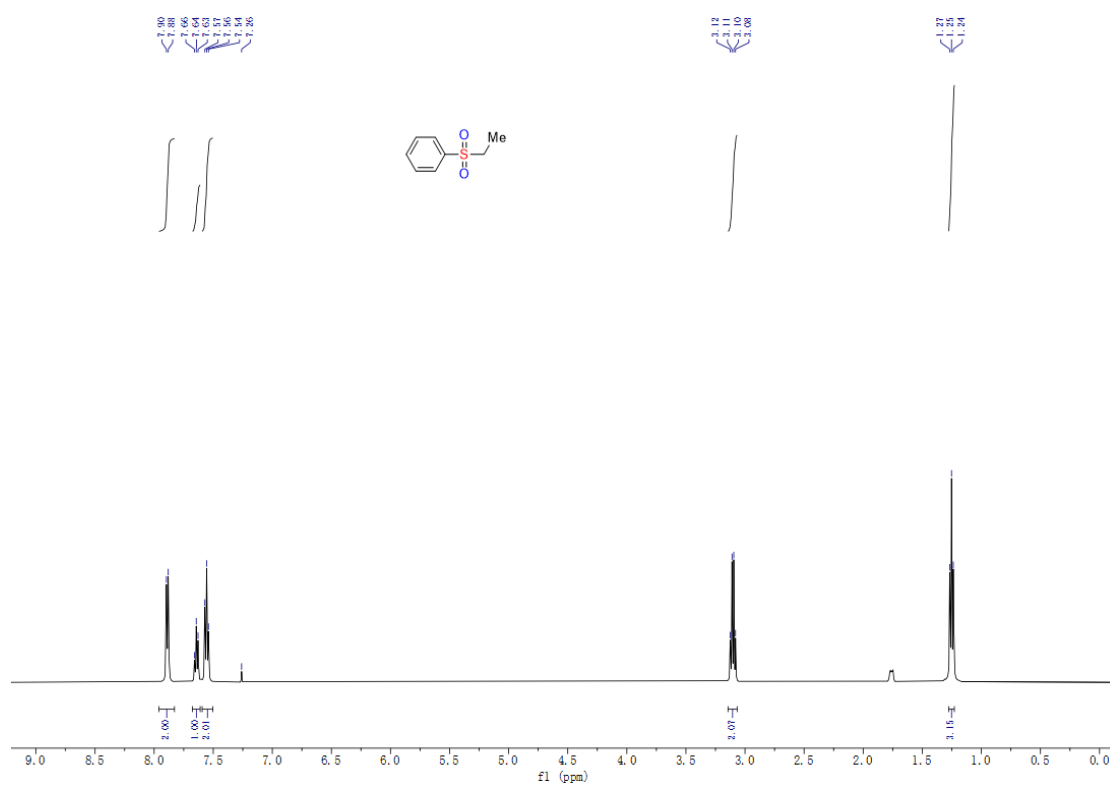

<sup>1</sup>H NMR of compound **3q**

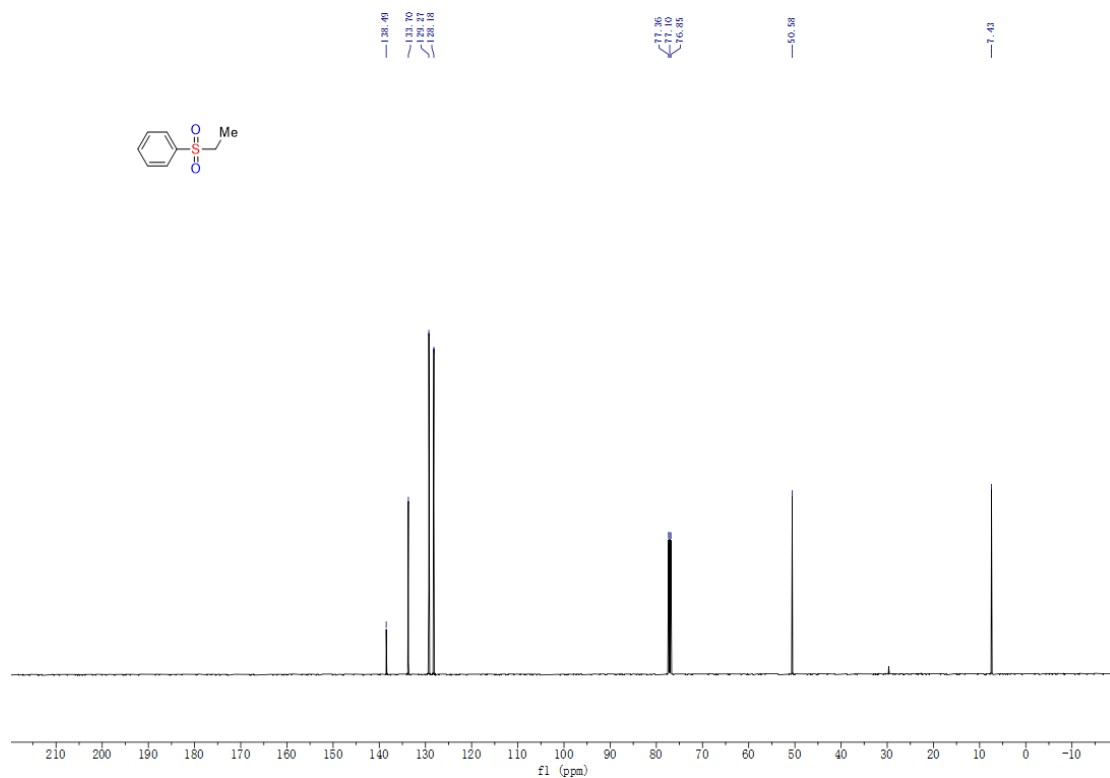

<sup>13</sup>C NMR of compound **3q**

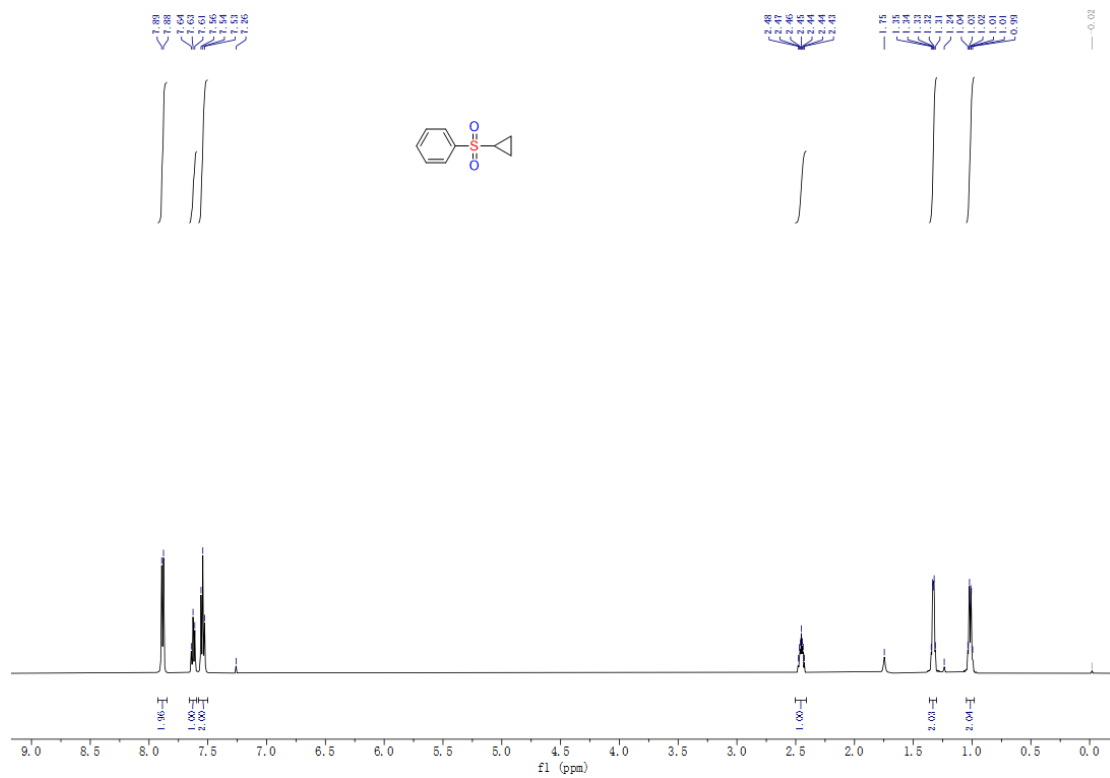

<sup>1</sup>H NMR of compound **3r**

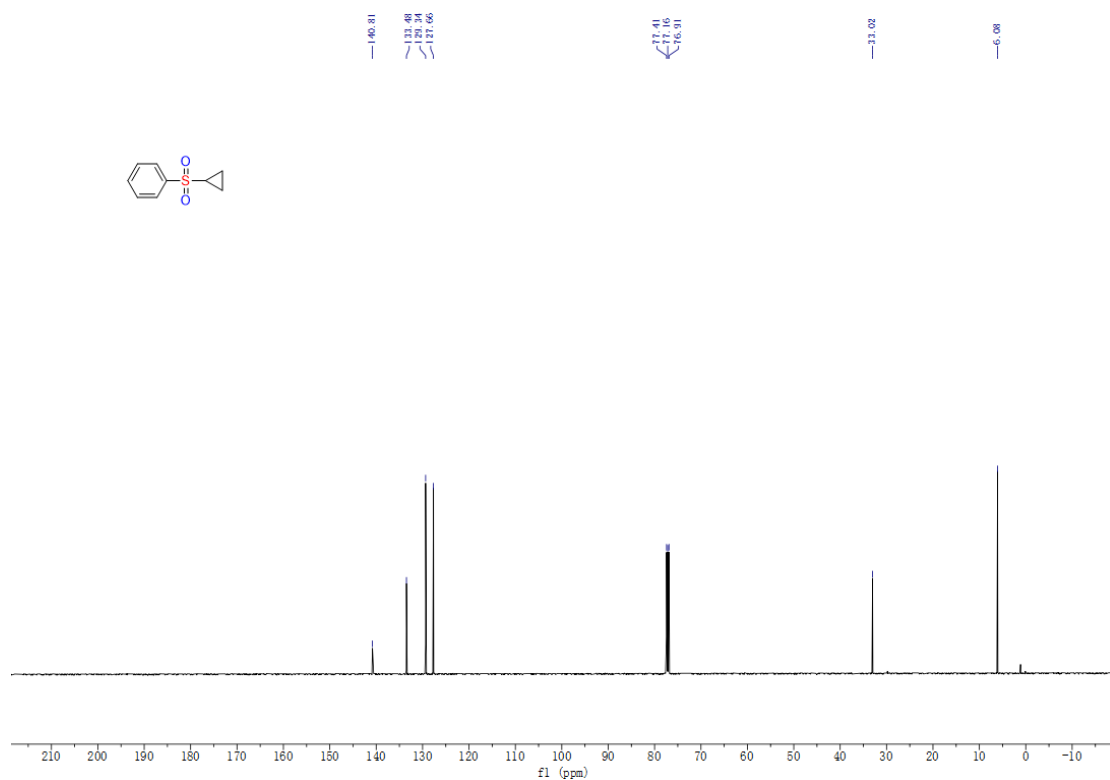

<sup>13</sup>C NMR of compound **3r**

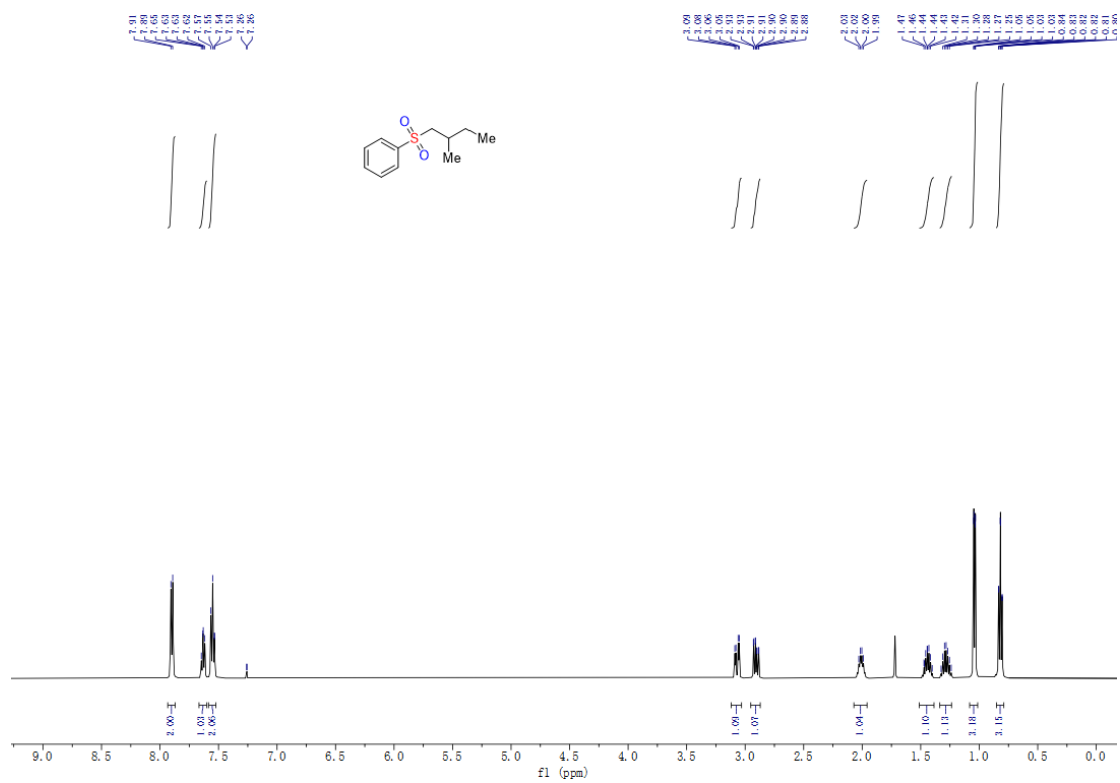

<sup>1</sup>H NMR of compound 3s

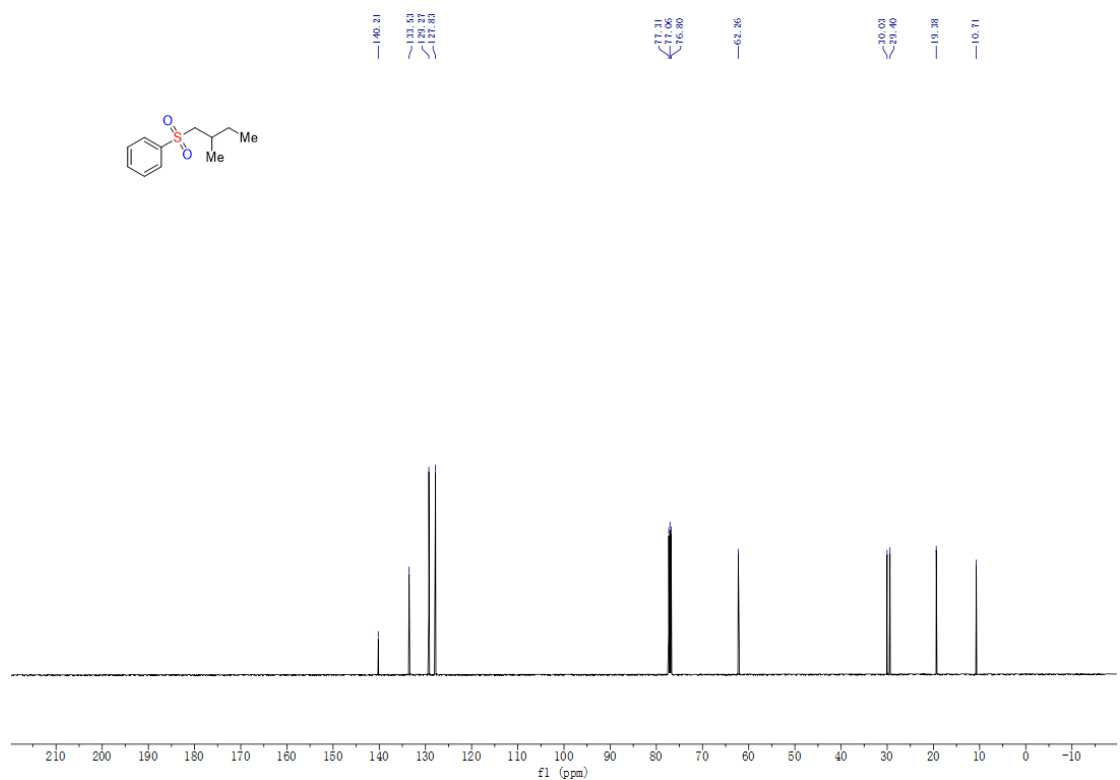

<sup>13</sup>C NMR of compound 3s

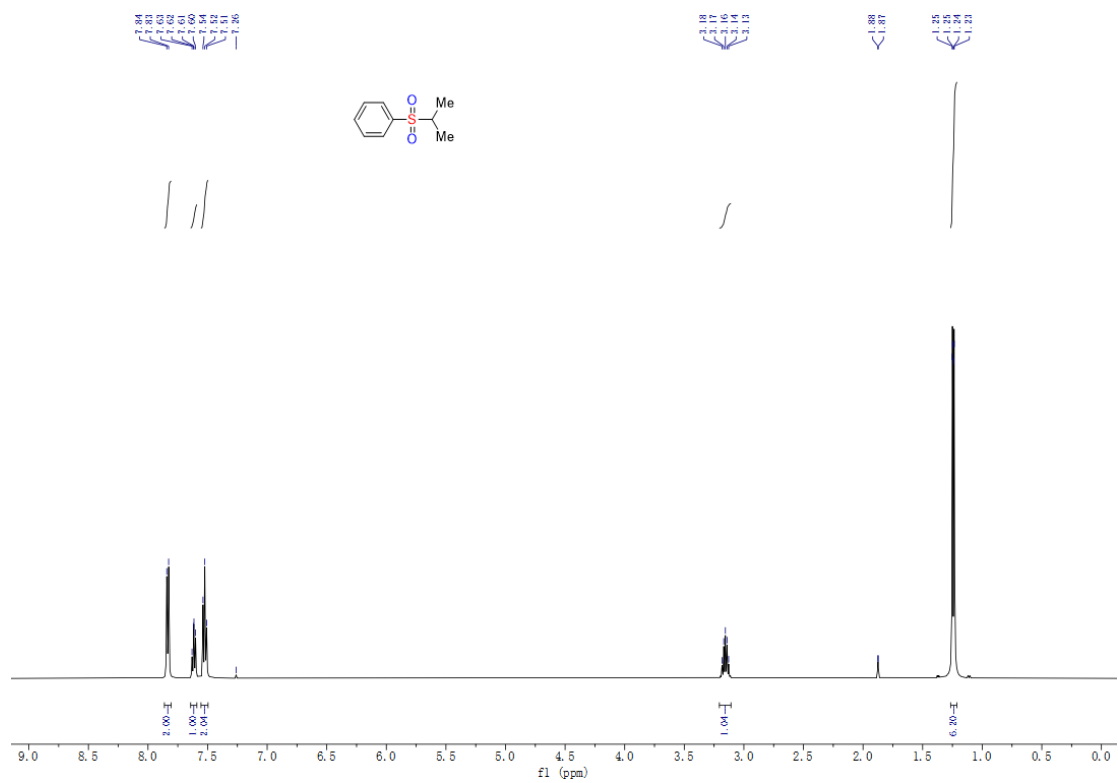

$^1\text{H NMR}$  of compound **3t**

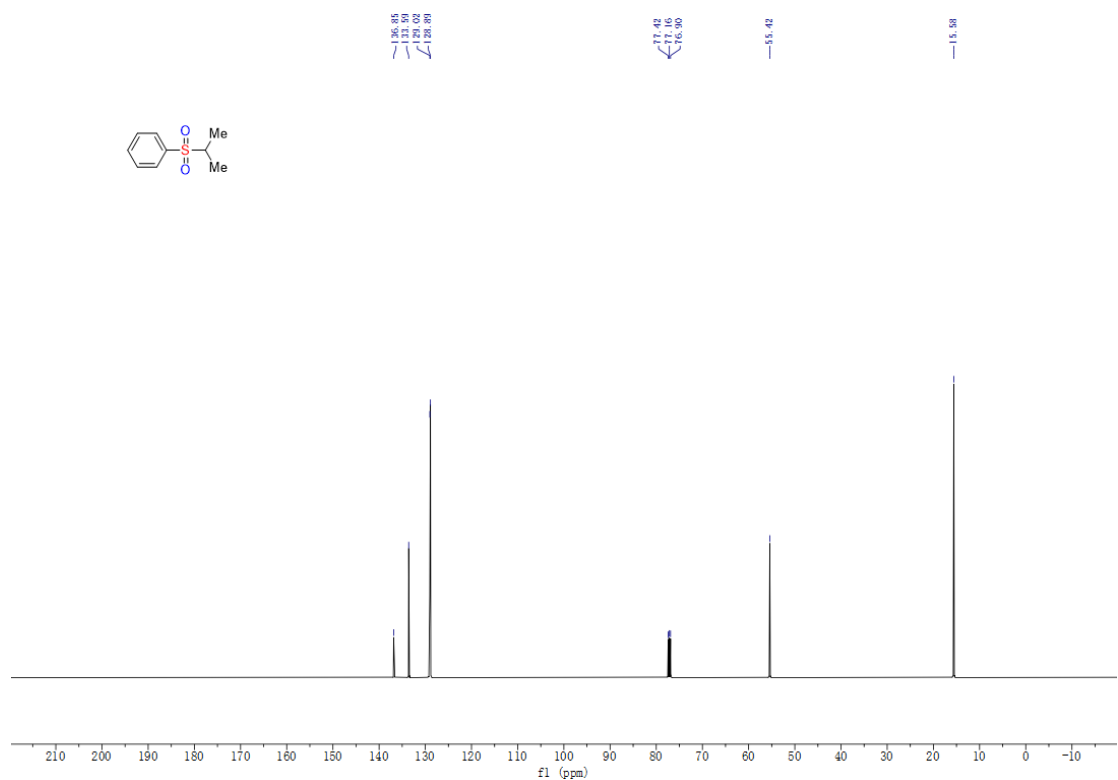

$^{13}\text{C NMR}$  of compound **3t**



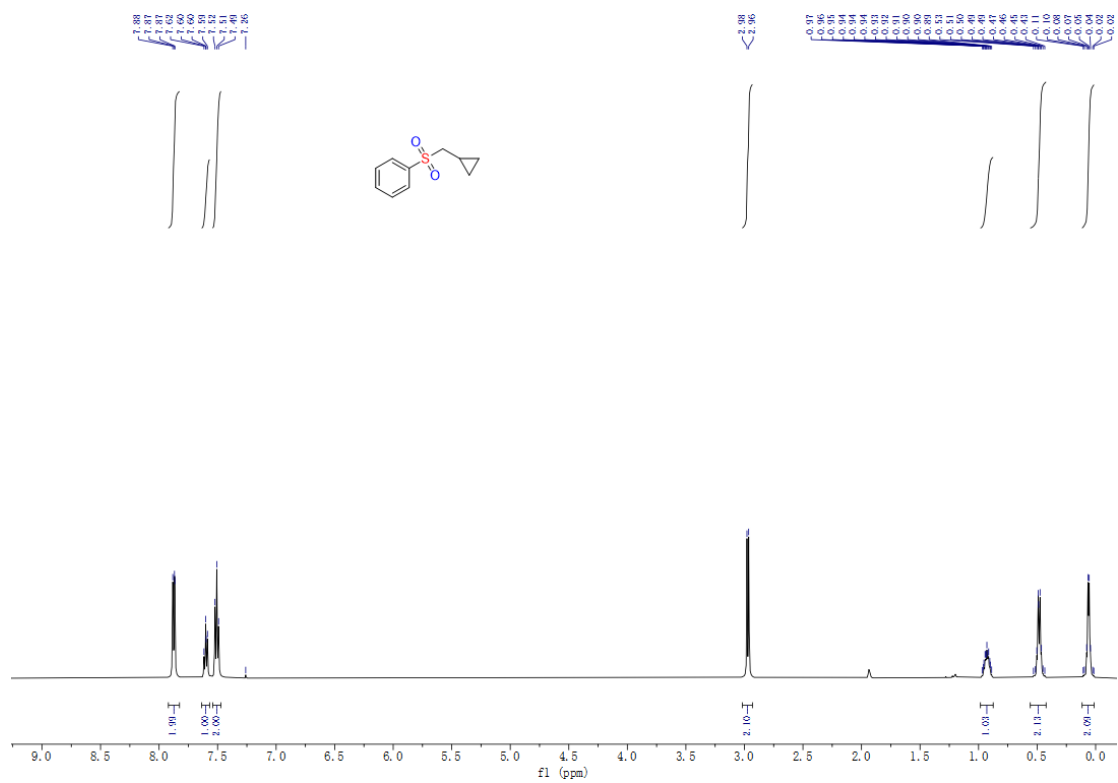

$^1\text{H NMR}$  of compound 3u

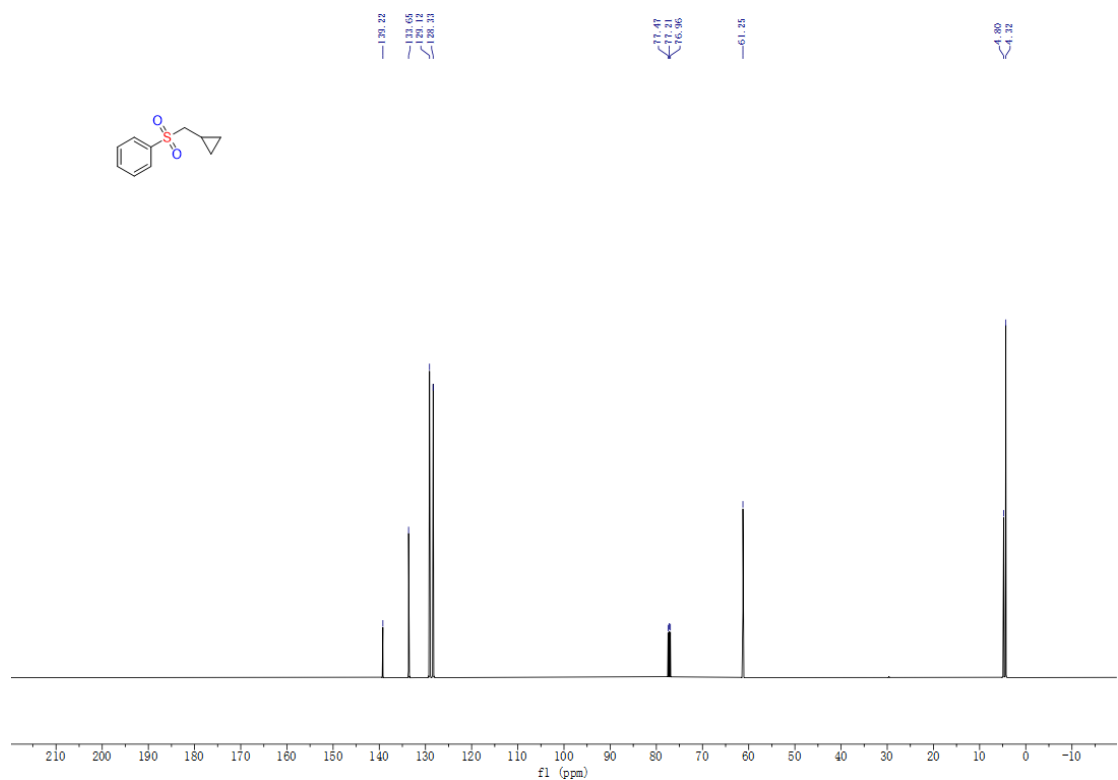

$^{13}\text{C NMR}$  of compound 3u

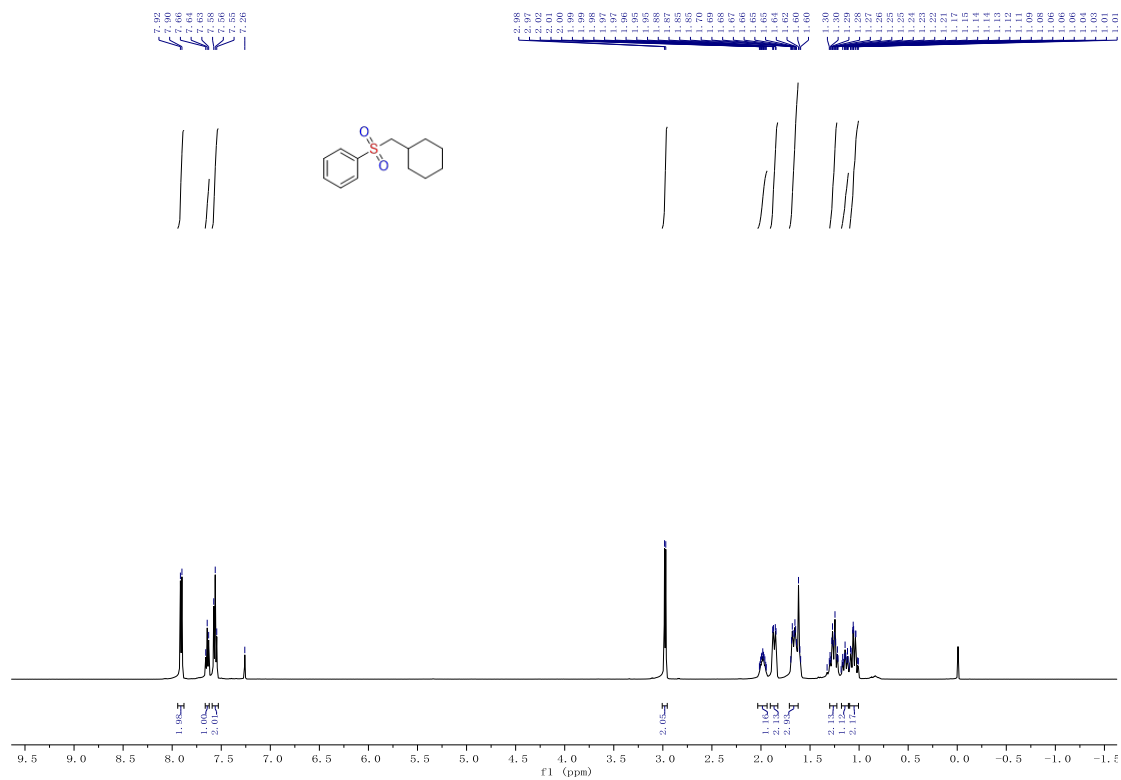

<sup>1</sup>H NMR of compound 3v

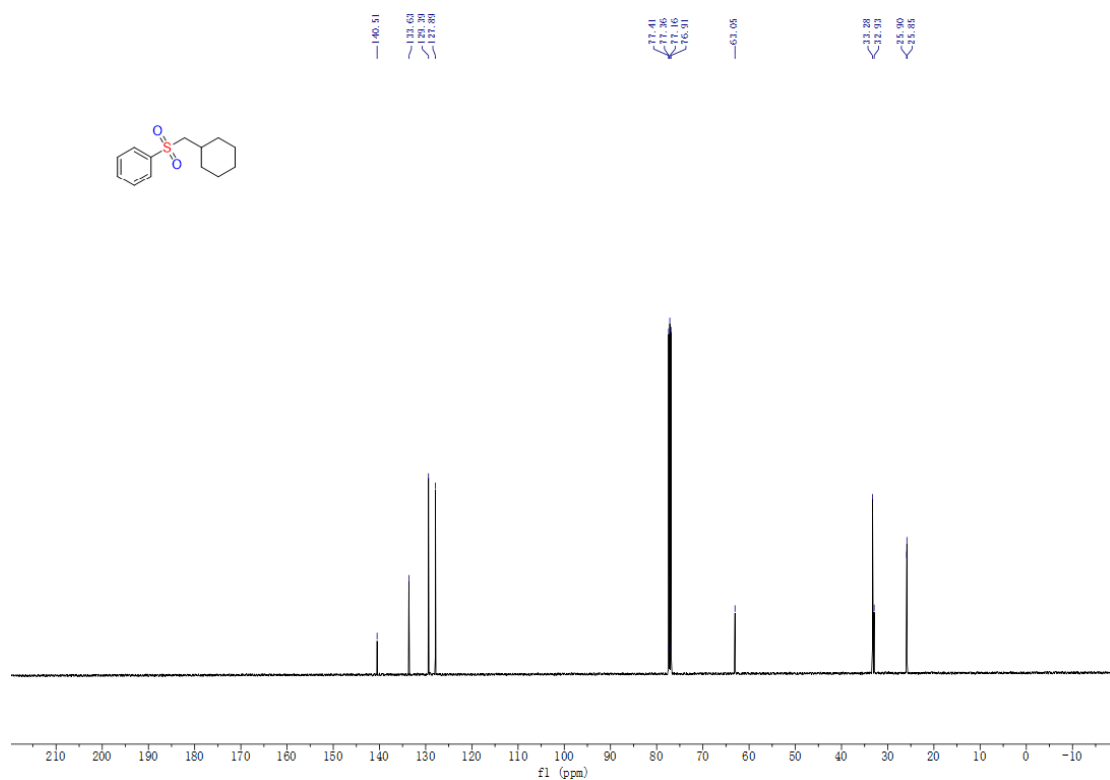

<sup>13</sup>C NMR of compound 3v

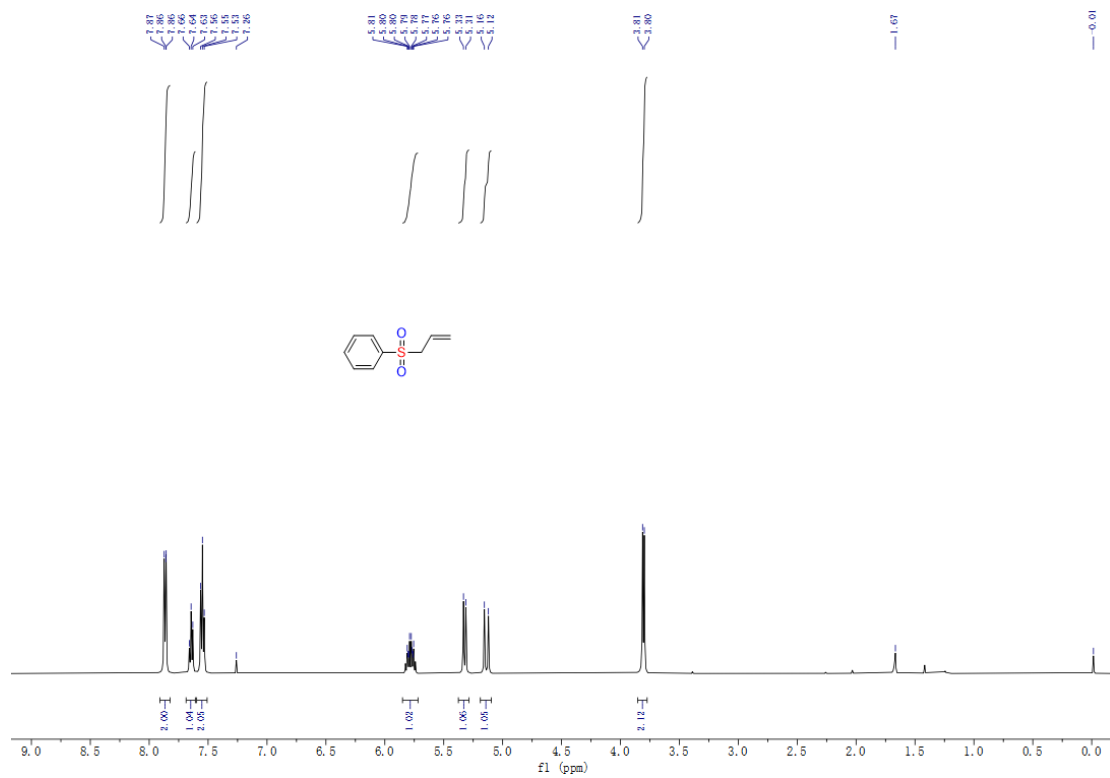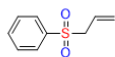

<sup>1</sup>H NMR of compound **3w**

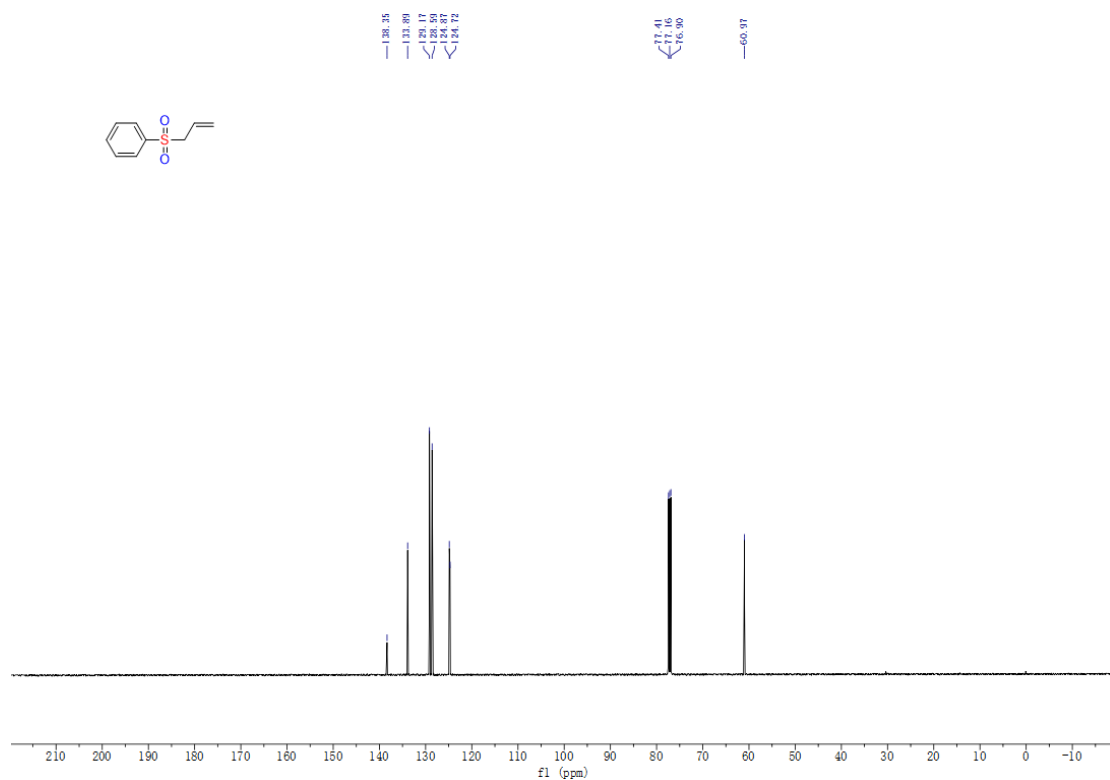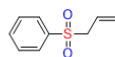

<sup>13</sup>C NMR of compound **3w**

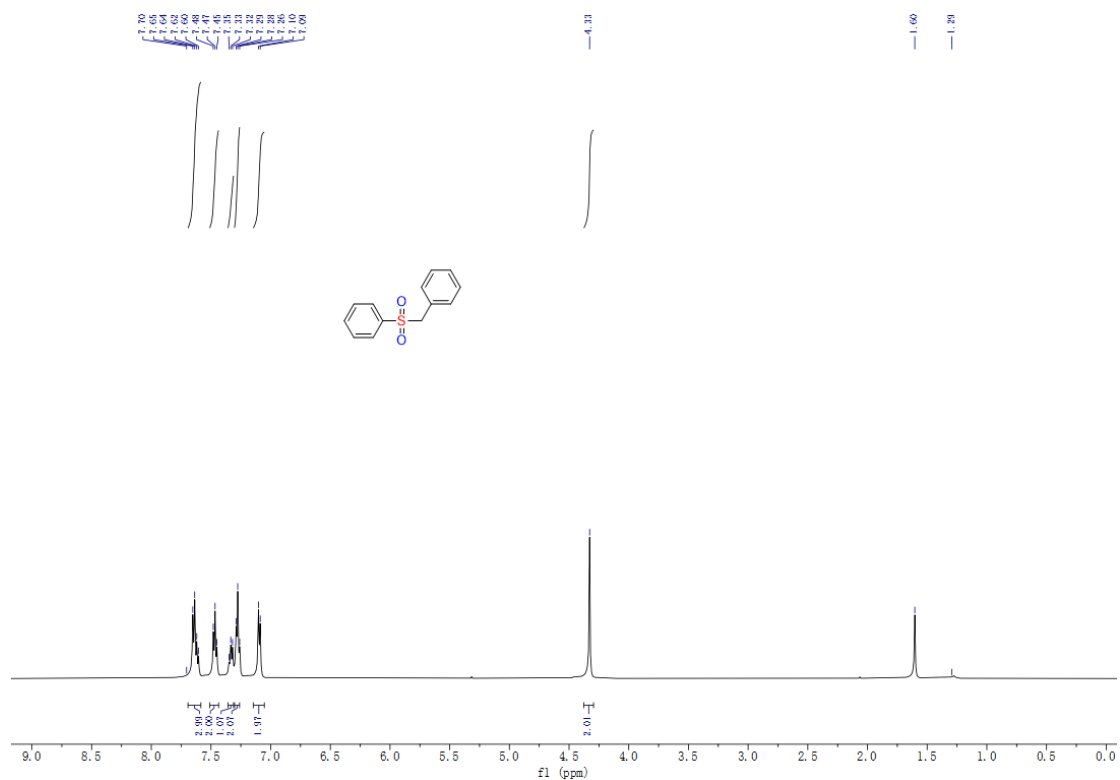

$^1\text{H NMR}$  of compound **3x**

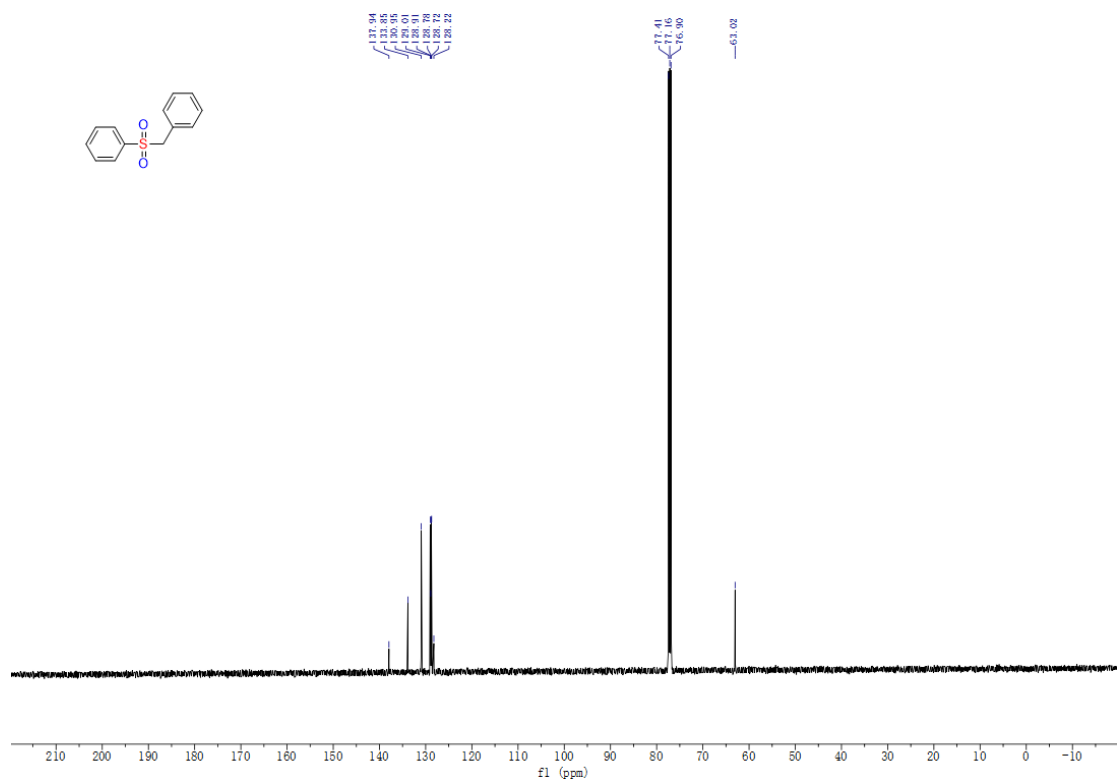

$^{13}\text{C NMR}$  of compound **3x**

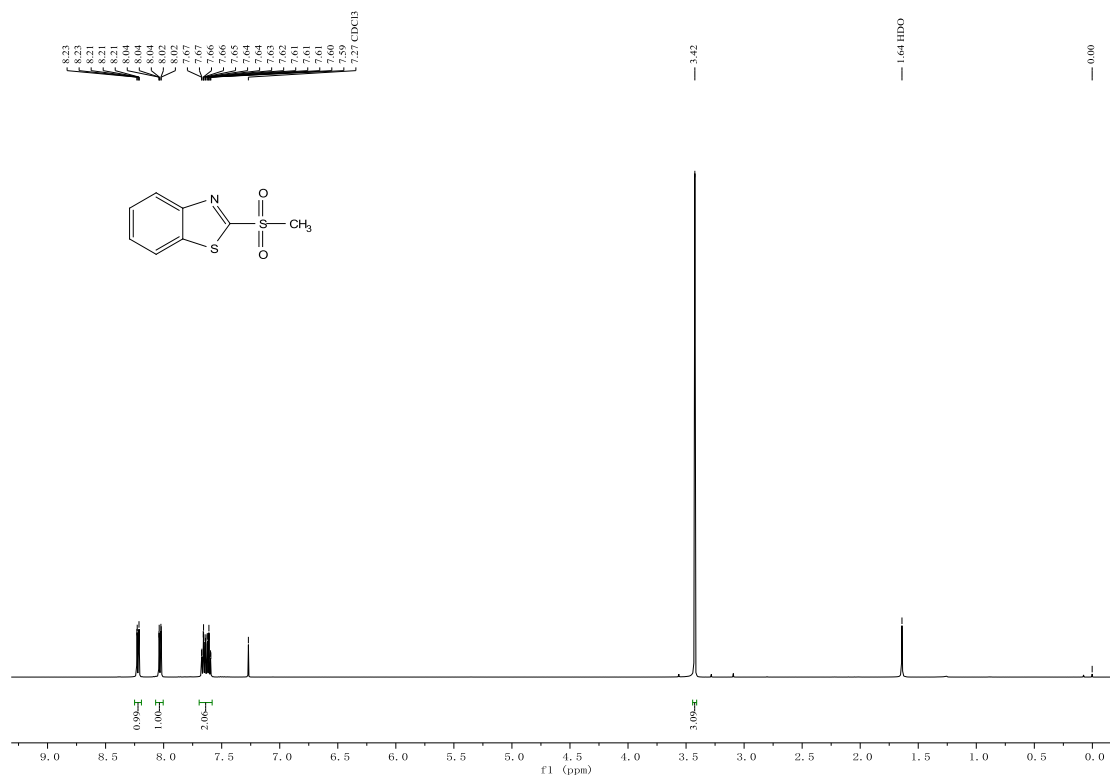

<sup>1</sup>H NMR of compound **3y**

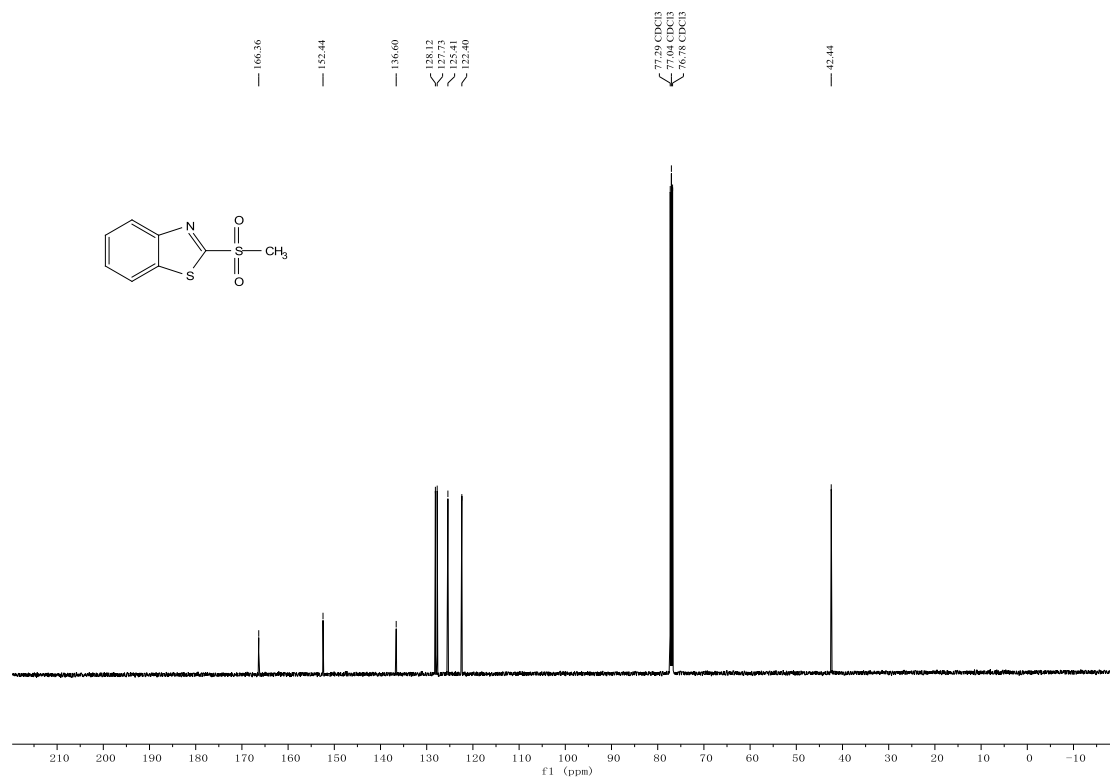

<sup>13</sup>C NMR of compound **3y**

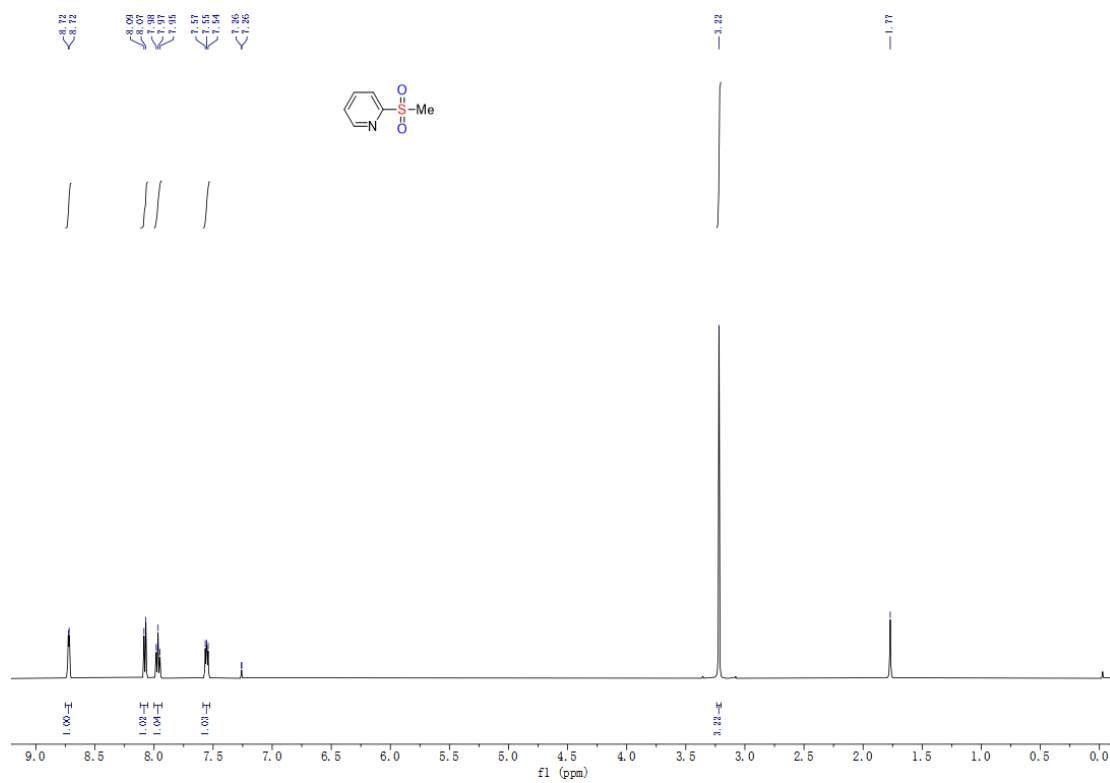

<sup>1</sup>H NMR of compound **3z**

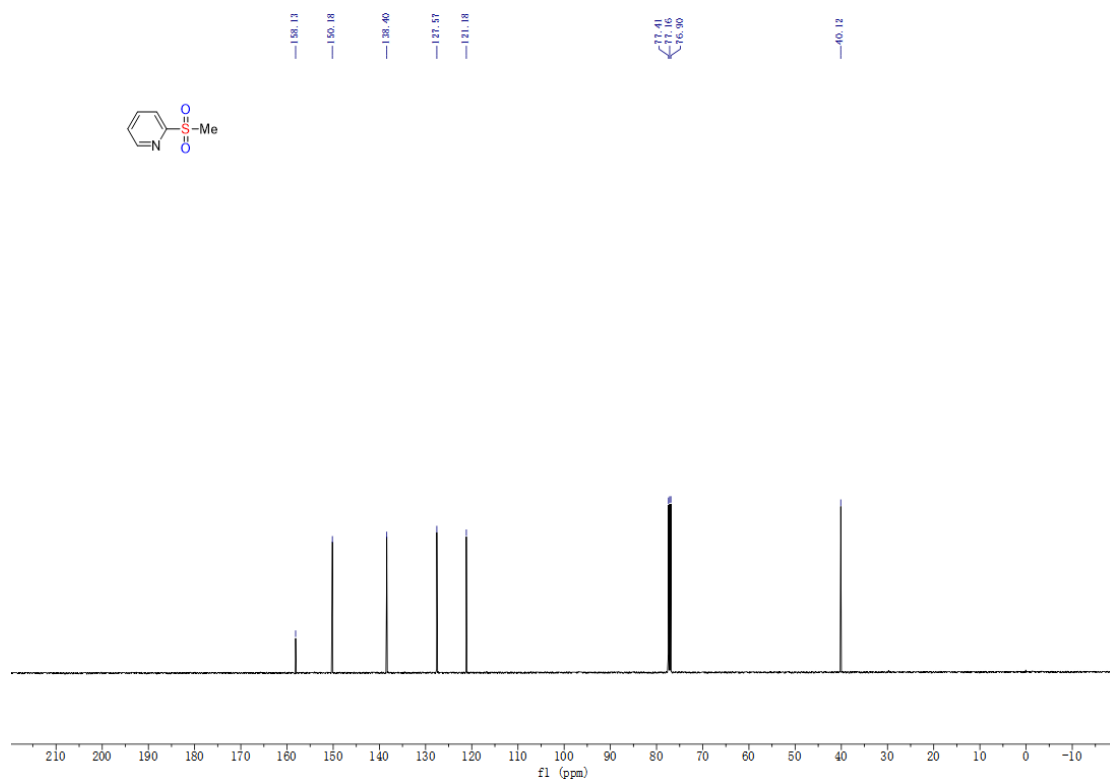

<sup>13</sup>C NMR of compound **3z**
